# Supplementary material for: Replication and Explorations of High-Order Epistasis Using a Large Advanced Intercross Line Pedigree
Source: PubMed Central journal article supplement (PMC3140984; doi:10.1371/journal.pgen.1002180), 2011-07-21

F values

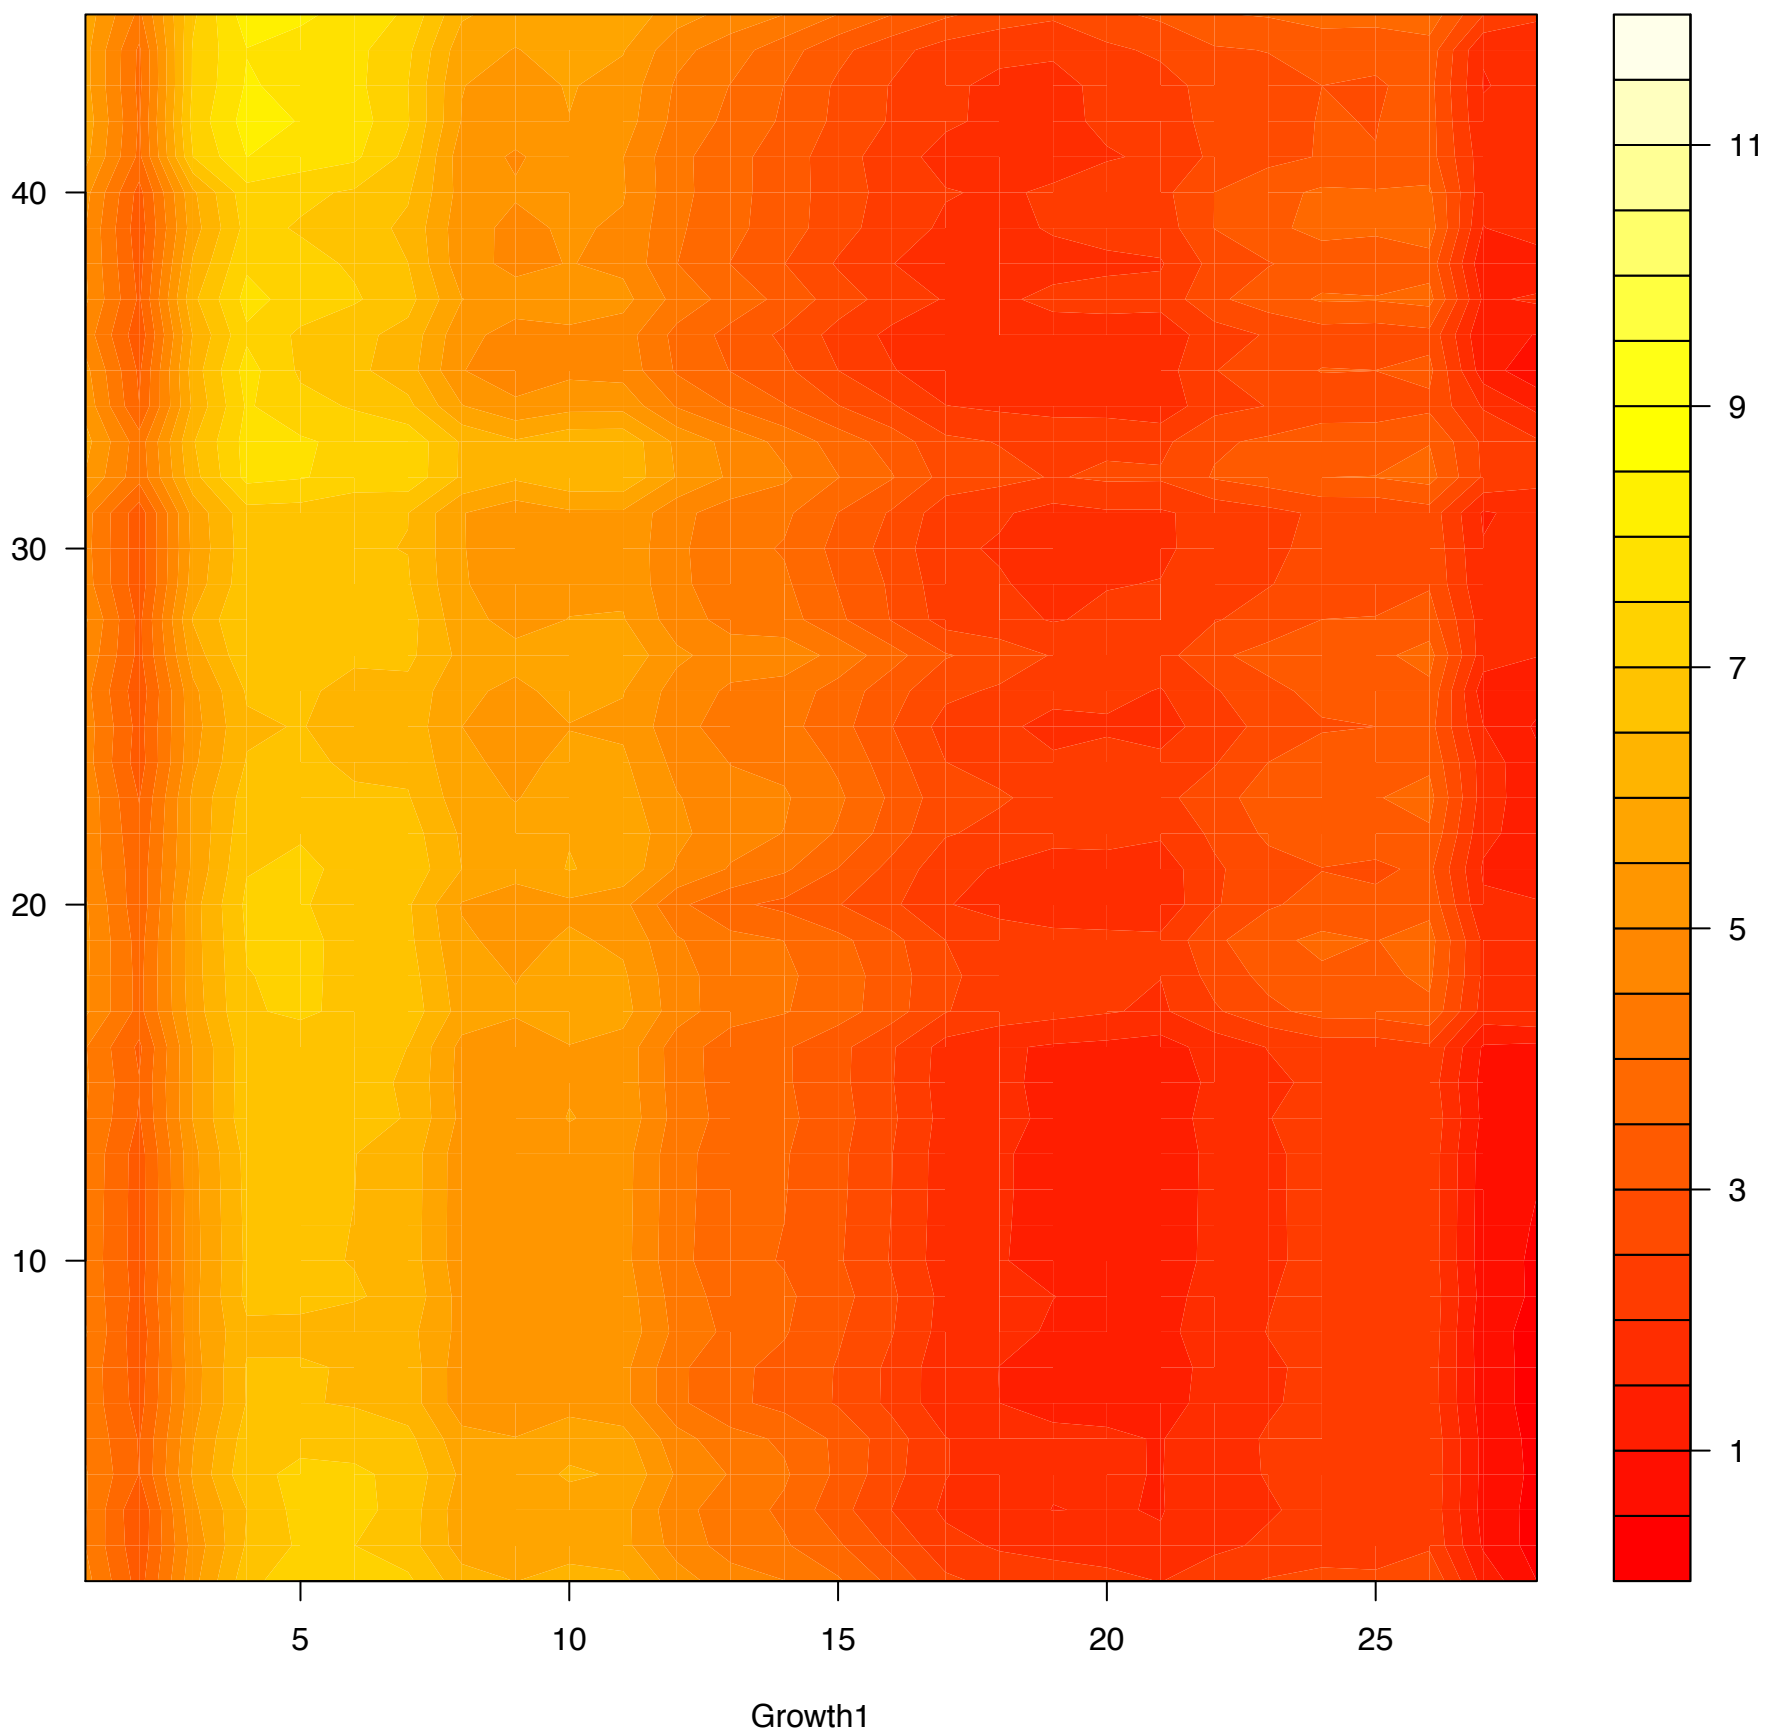

F values

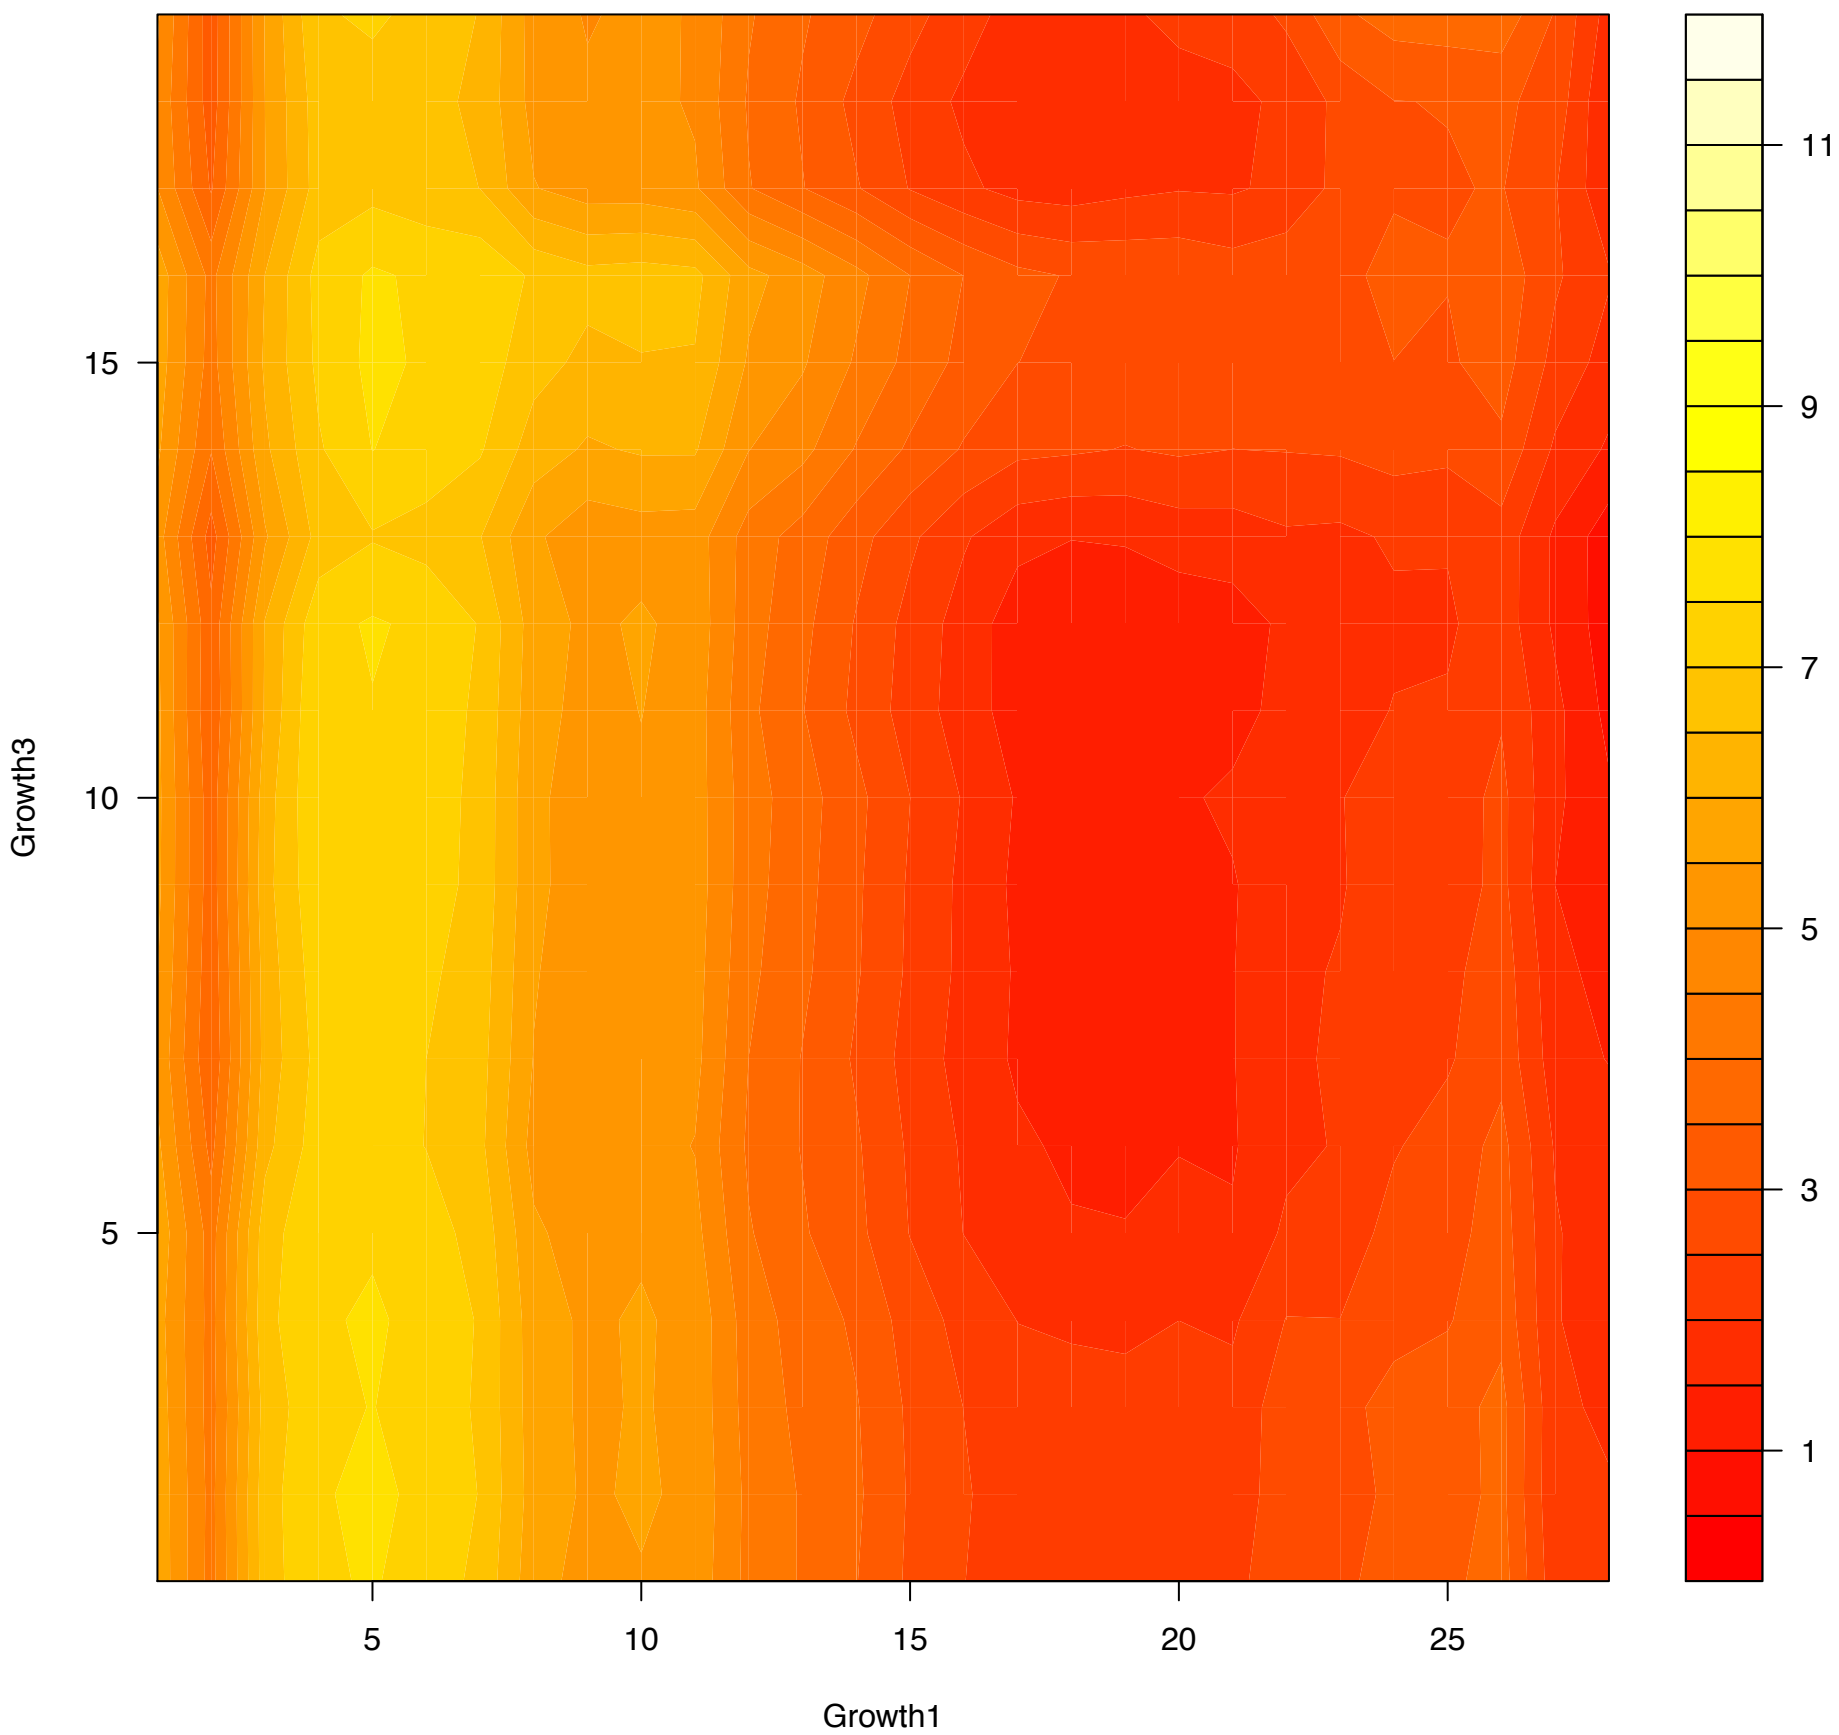

**F values**

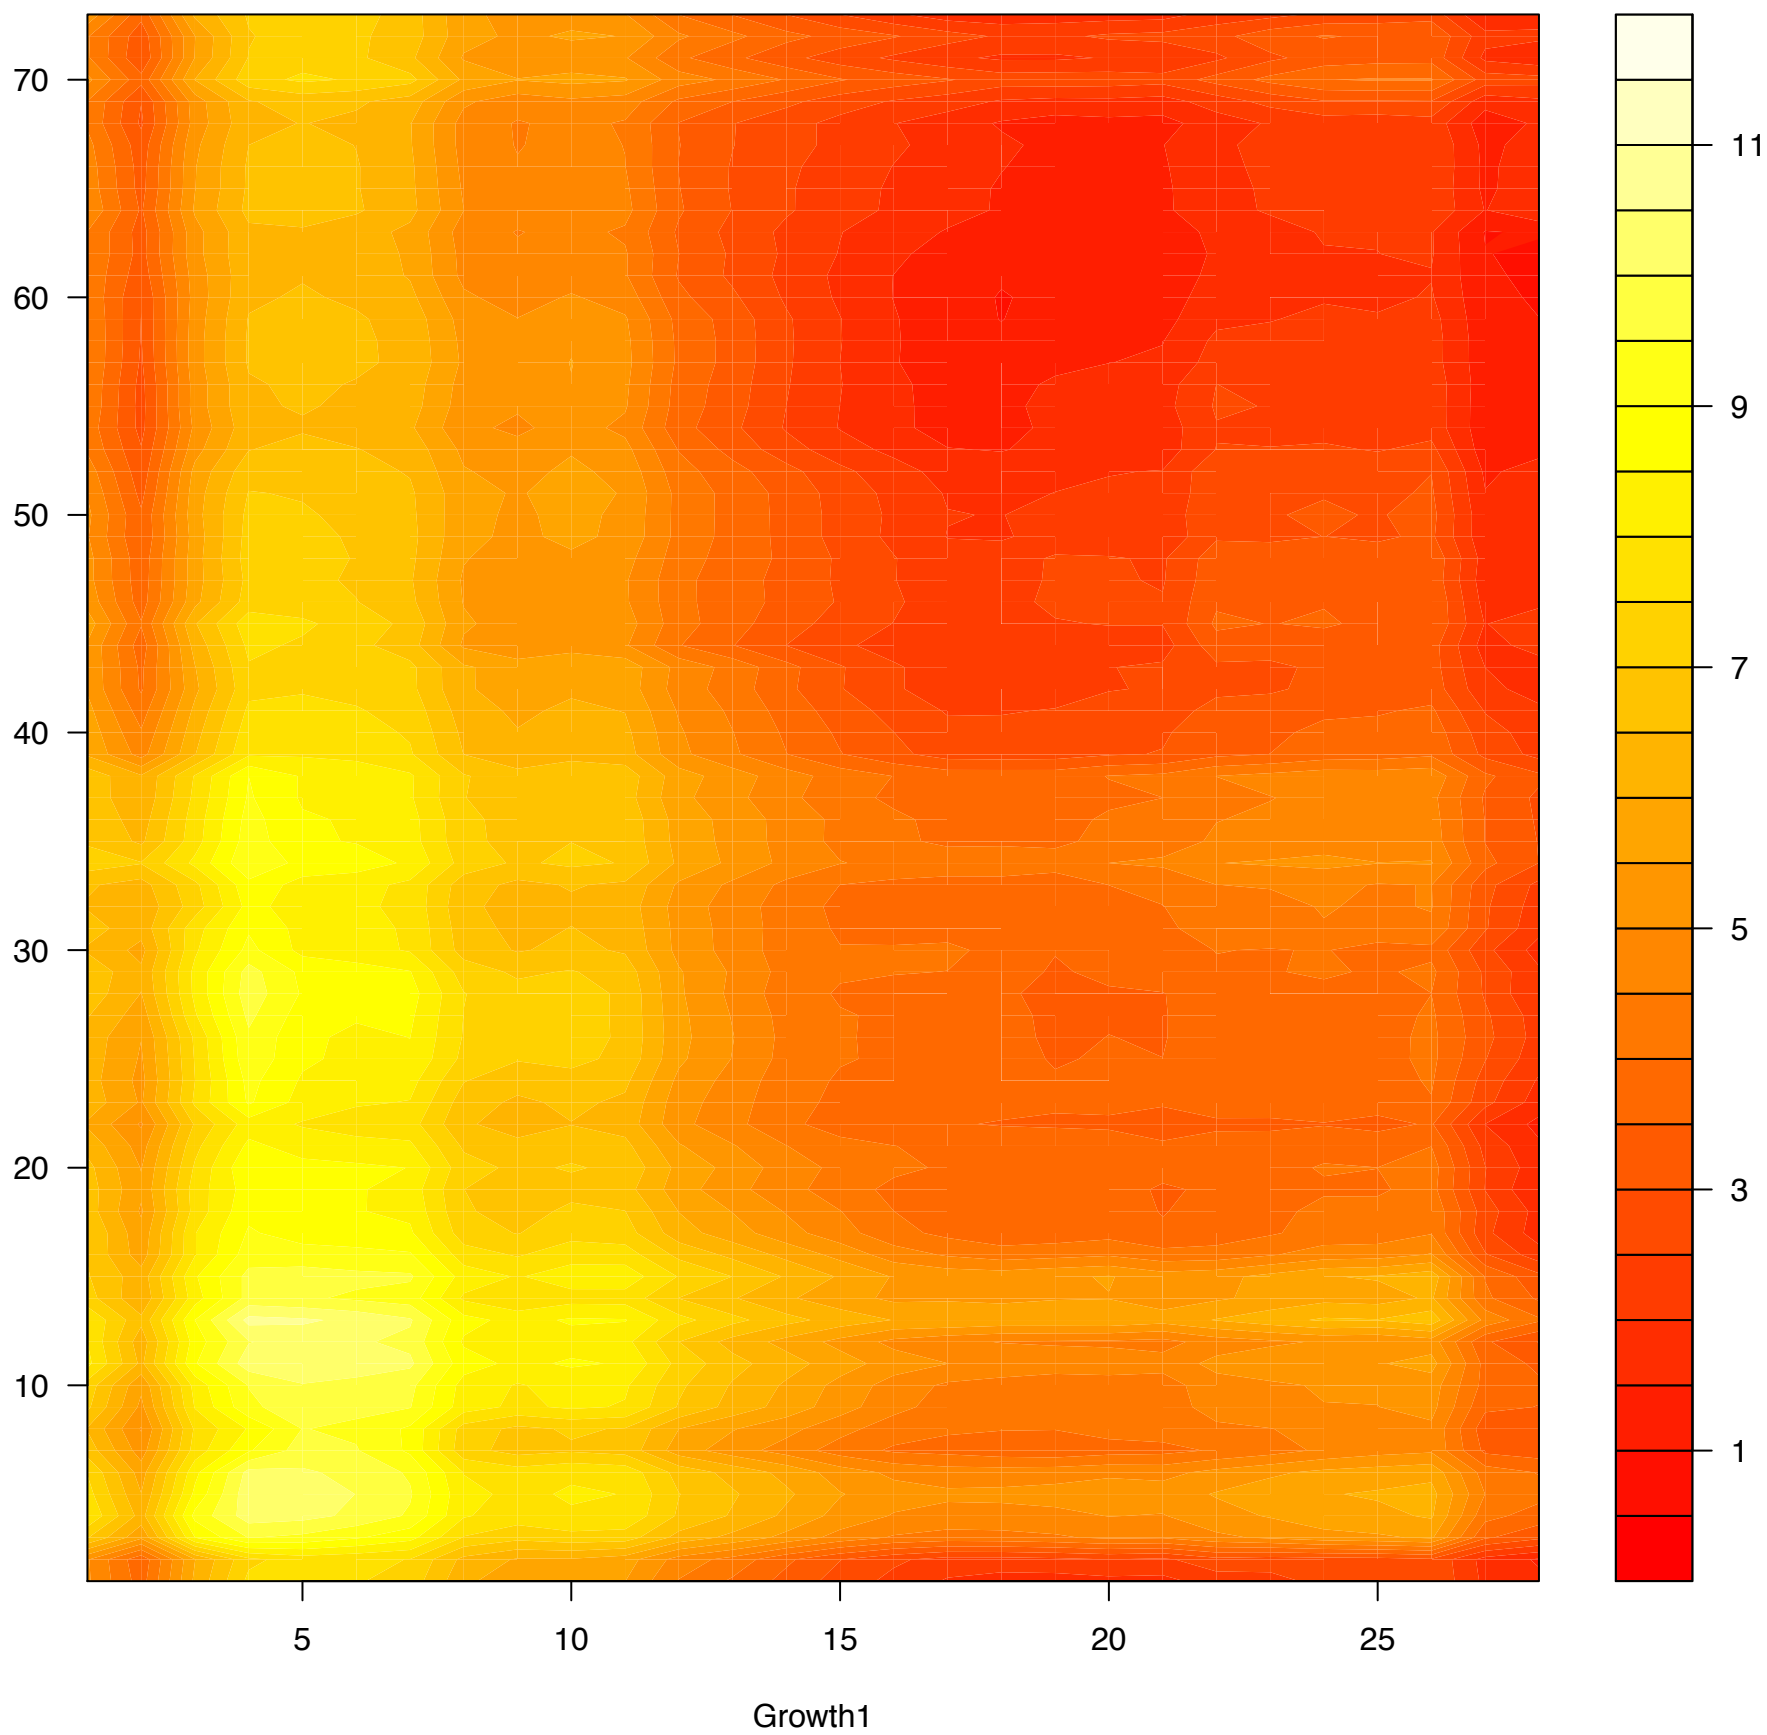

F values

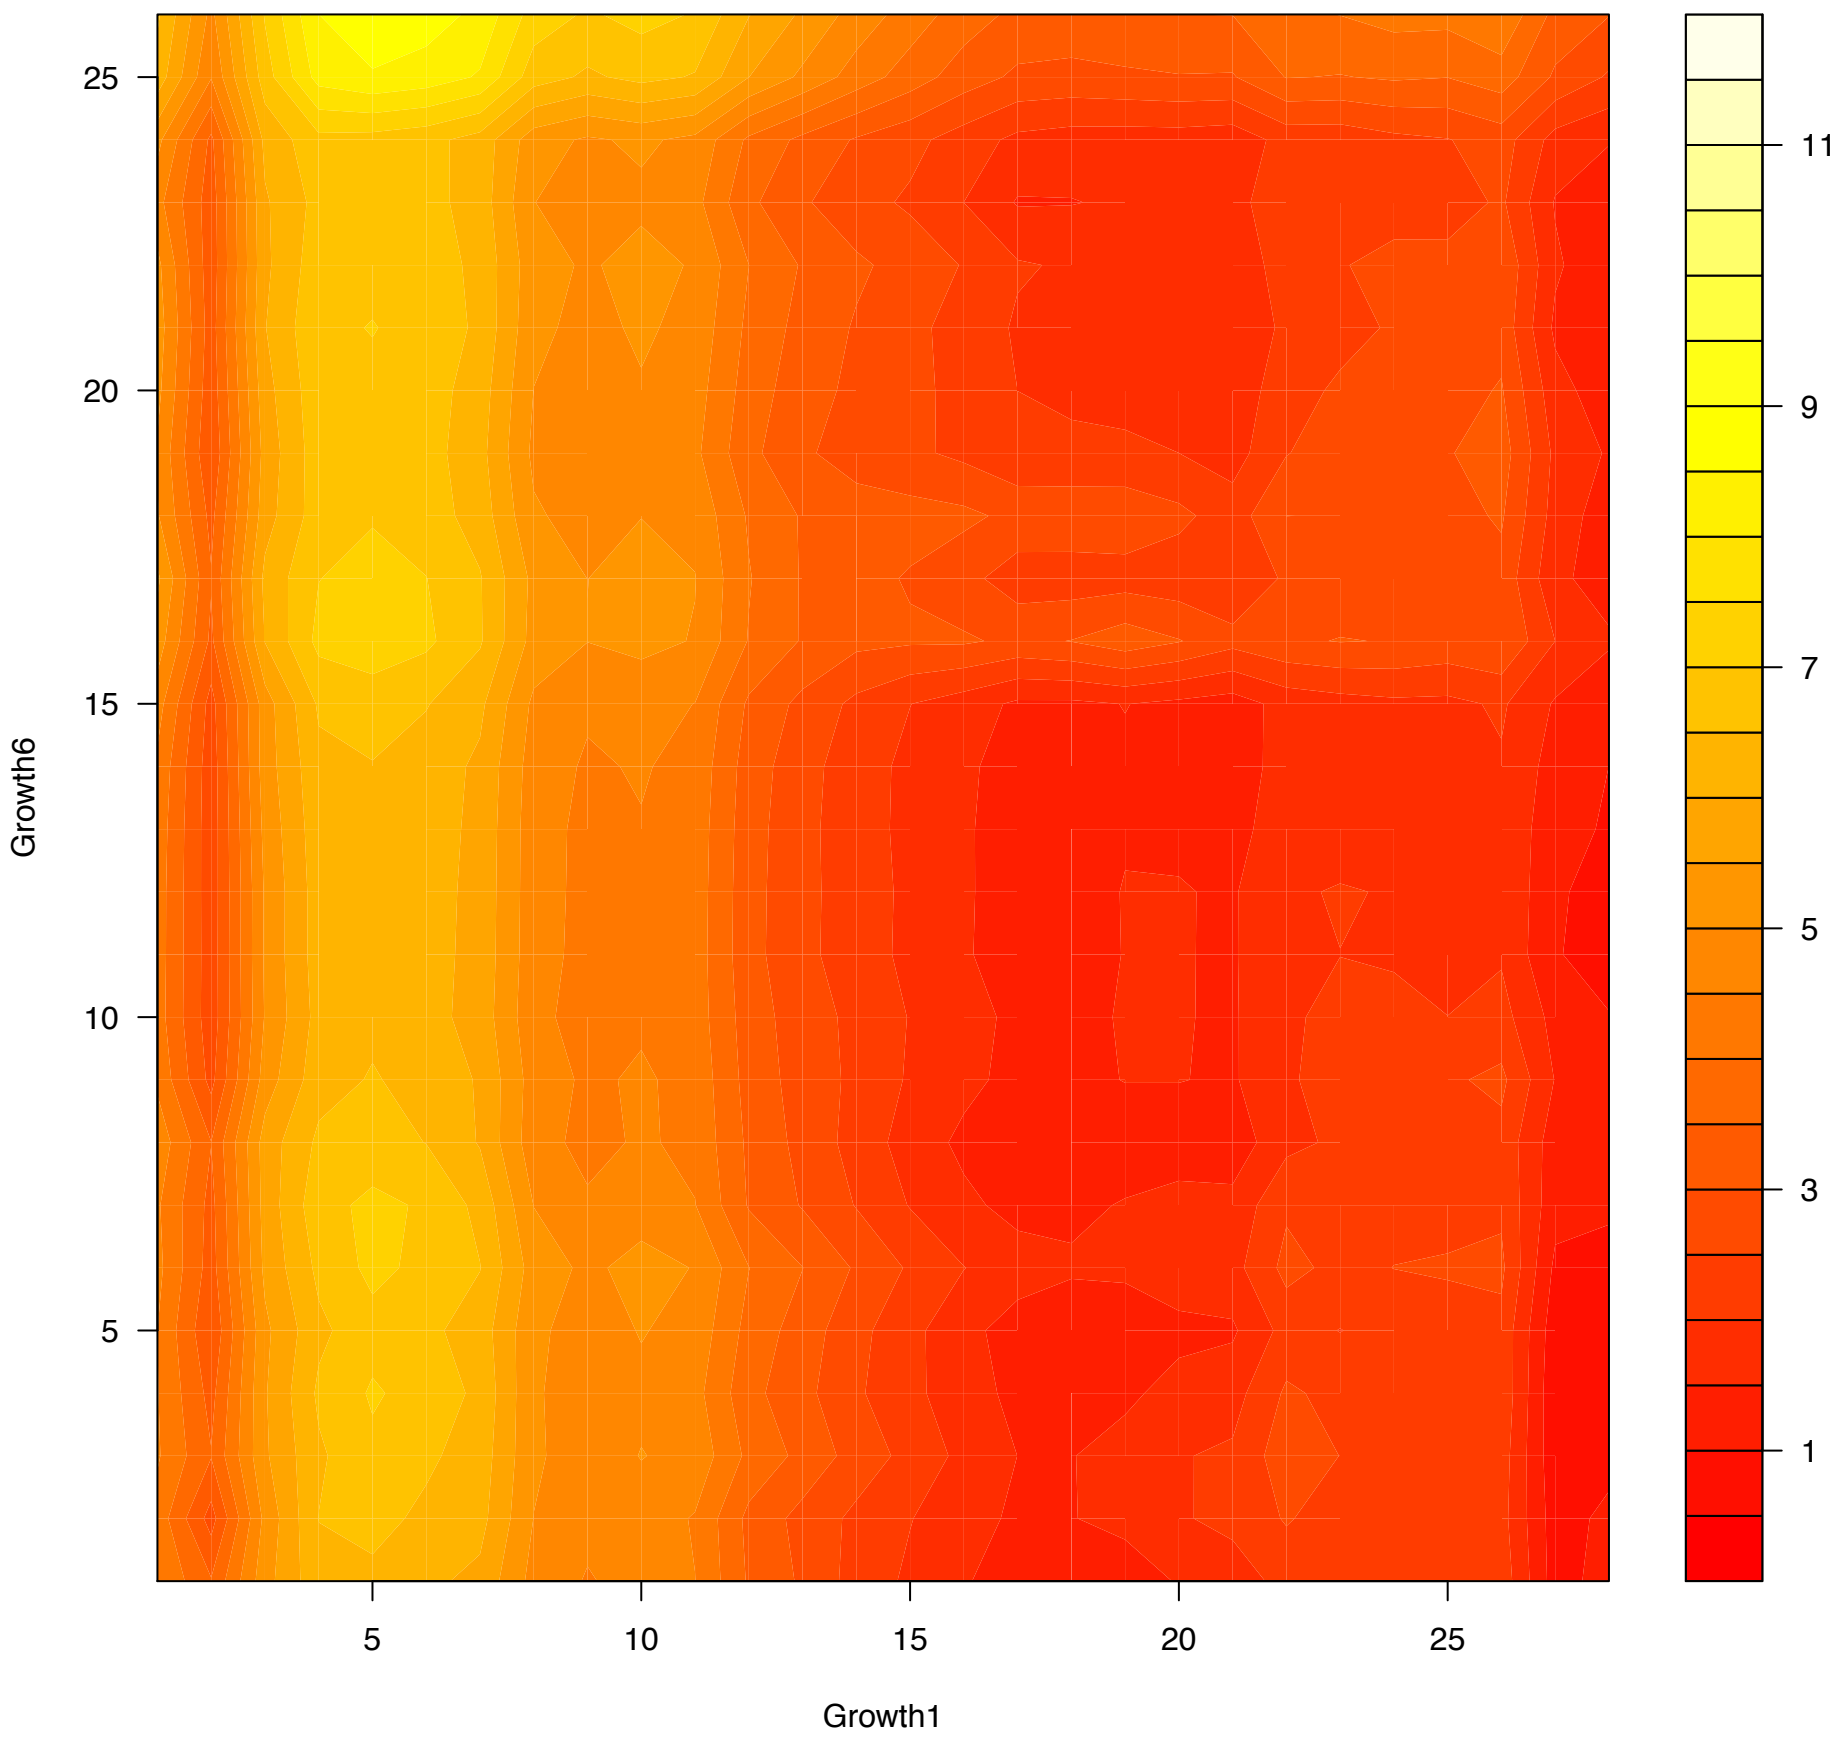

F values

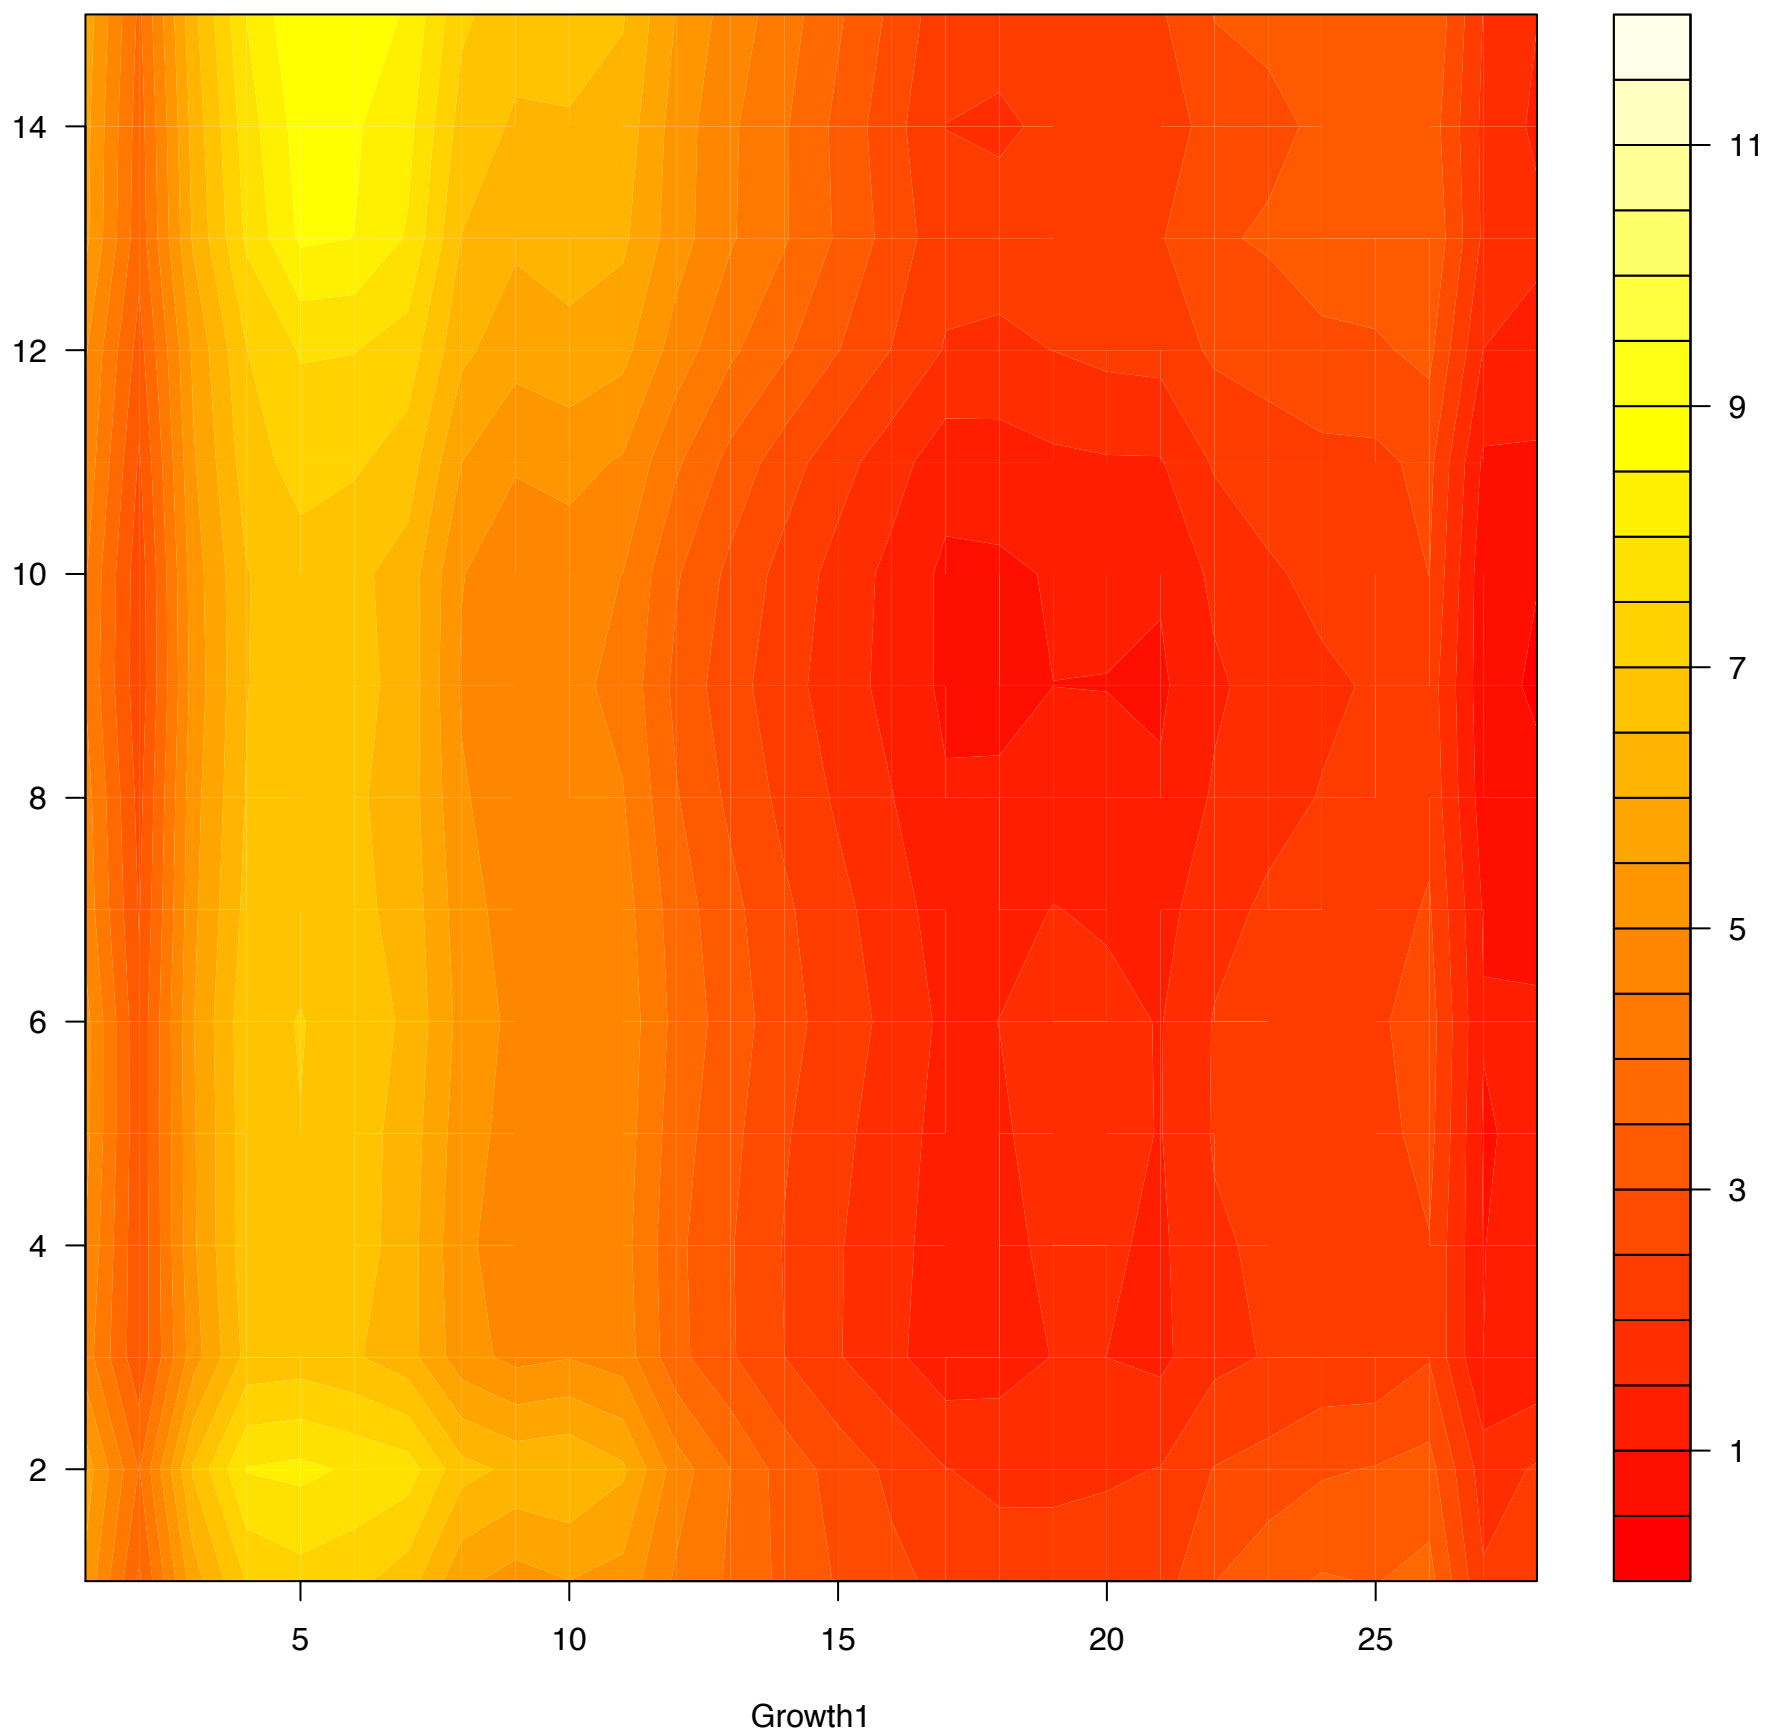

F values

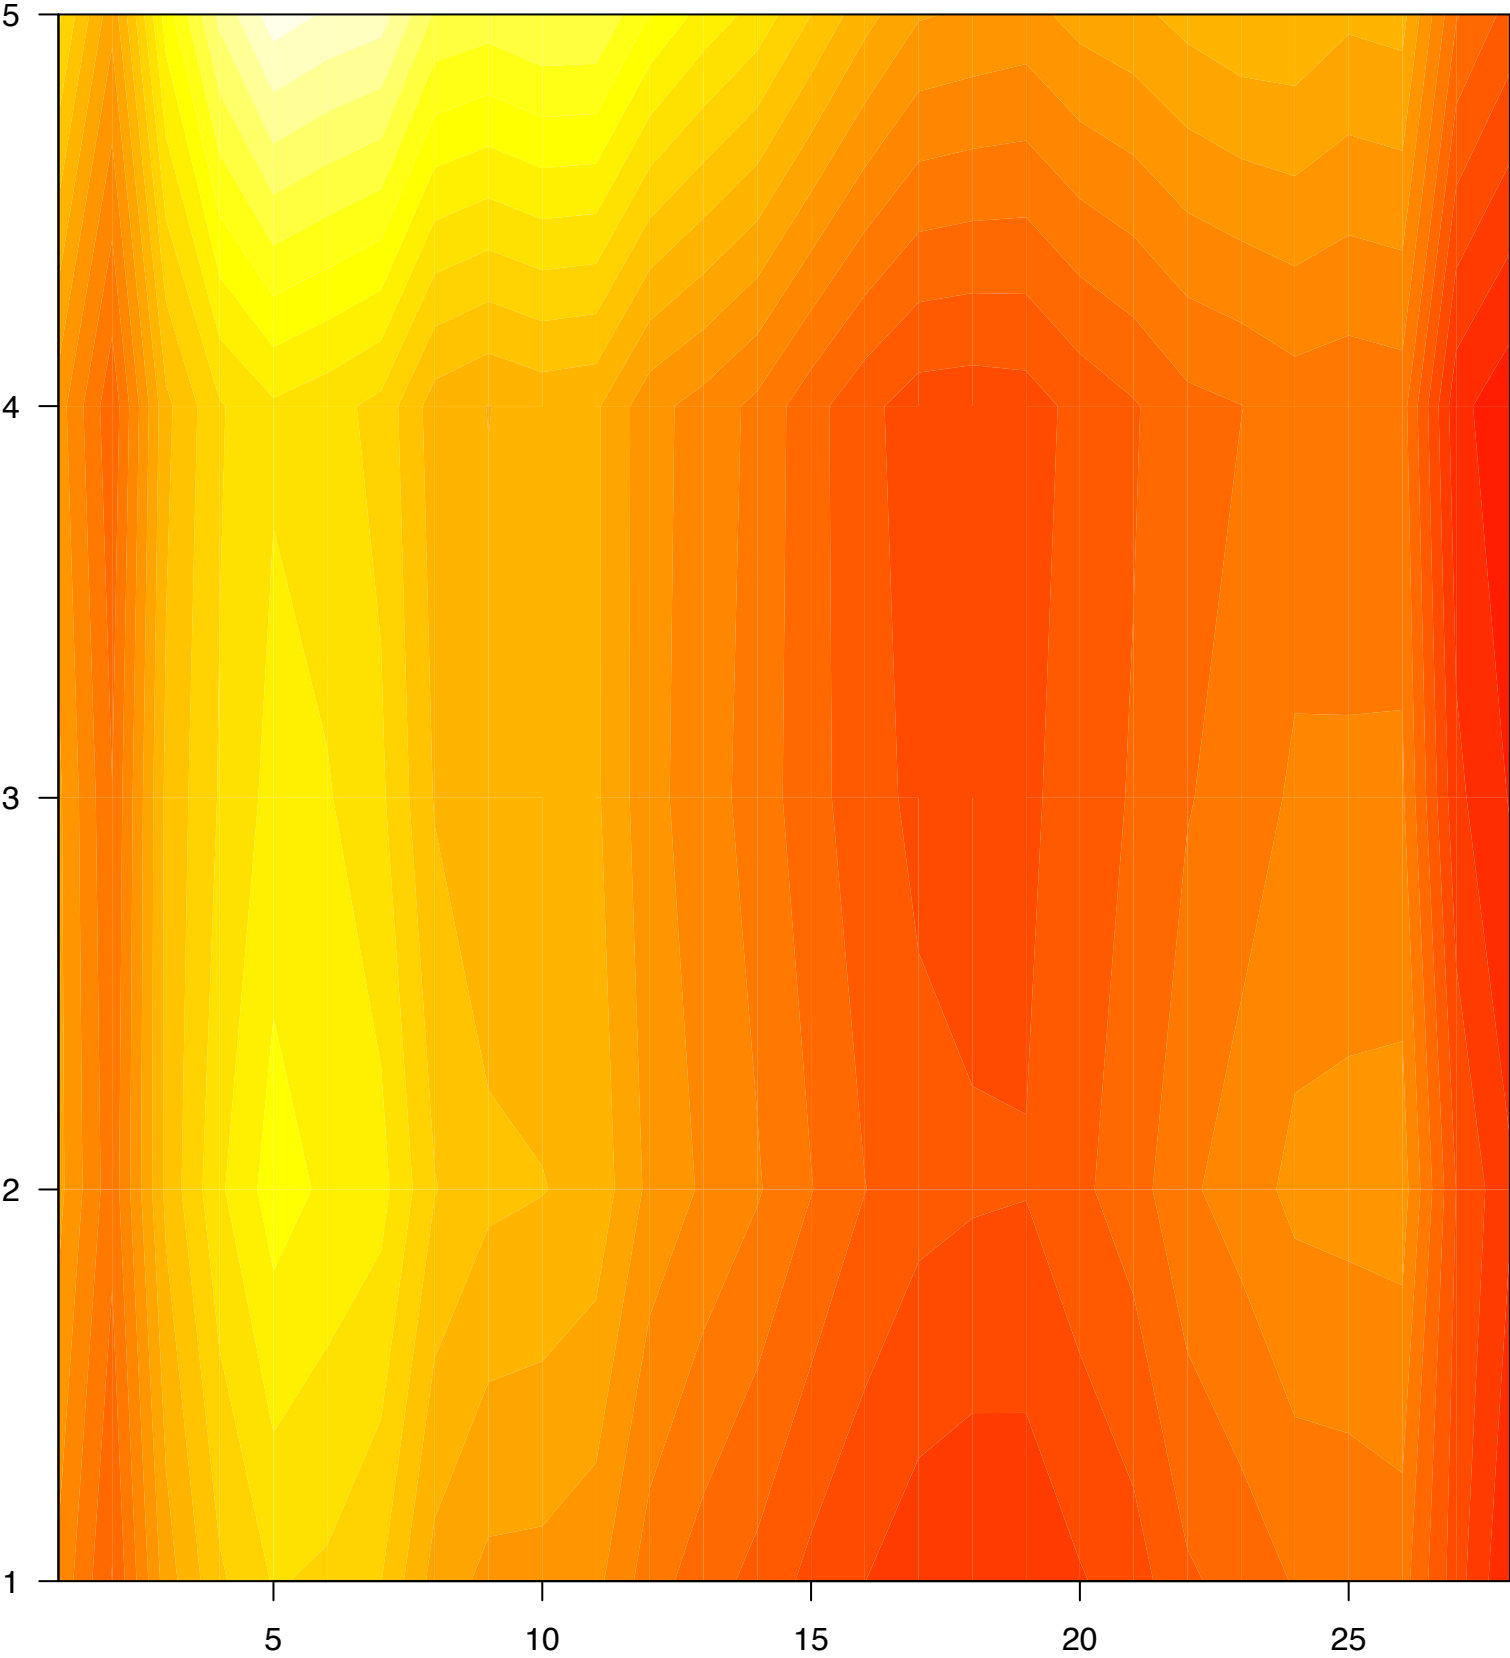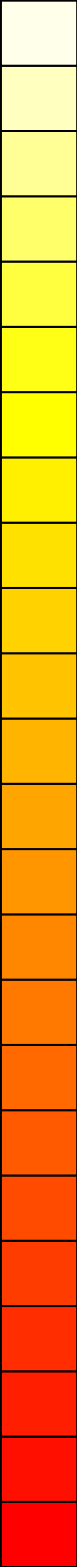

11  
9  
7  
5  
3  
1

F values

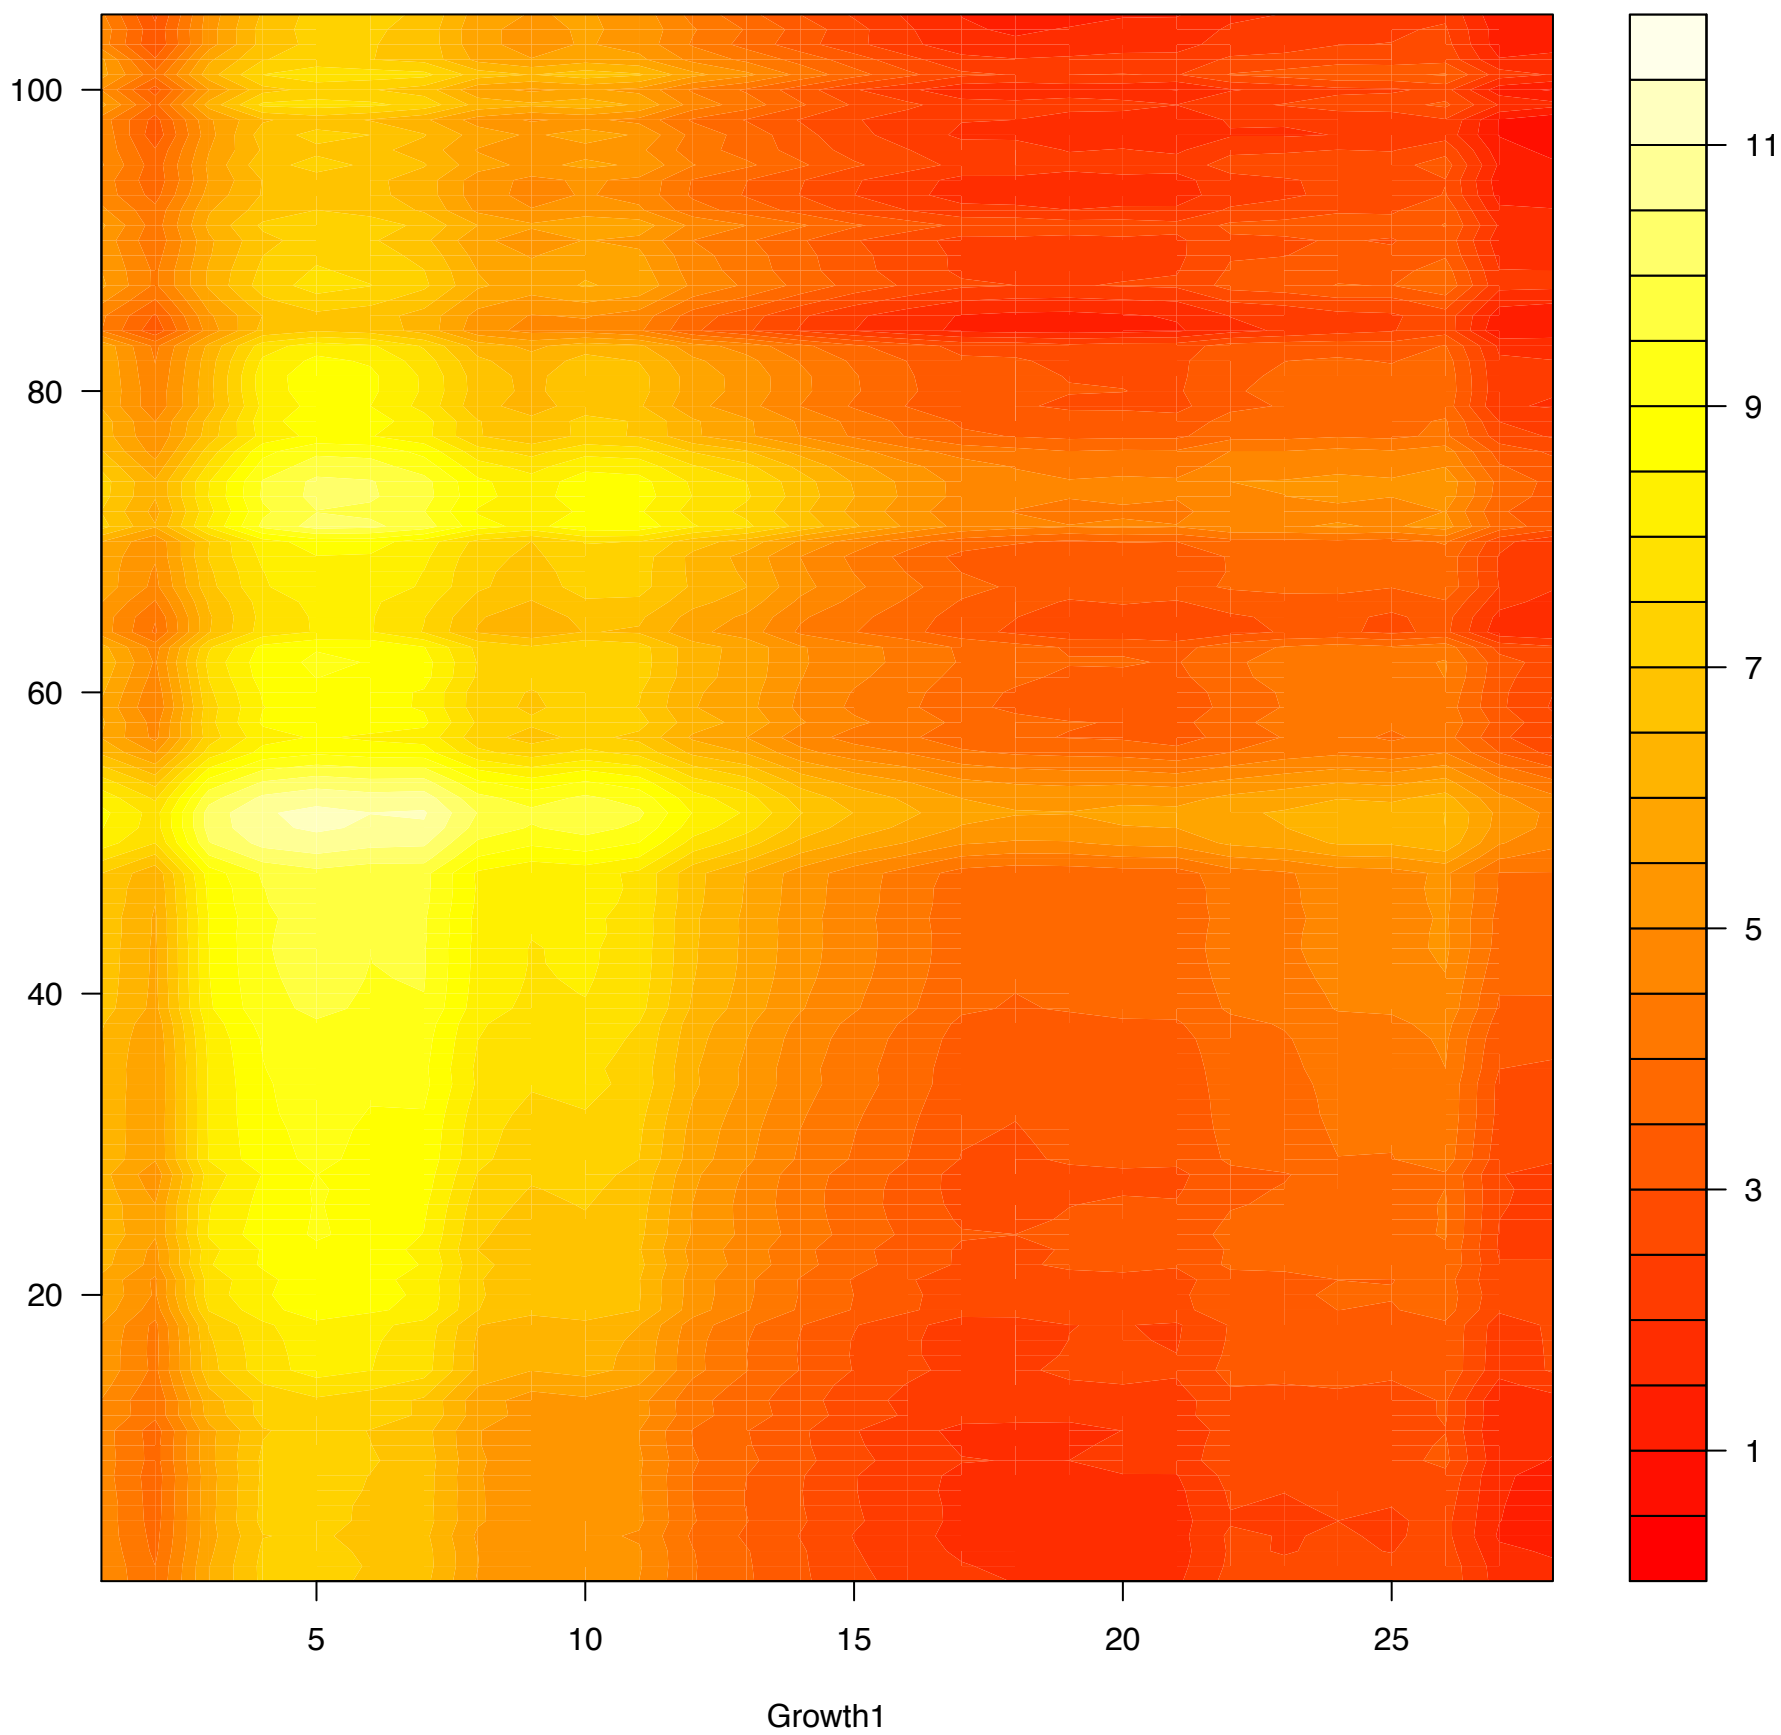

F values

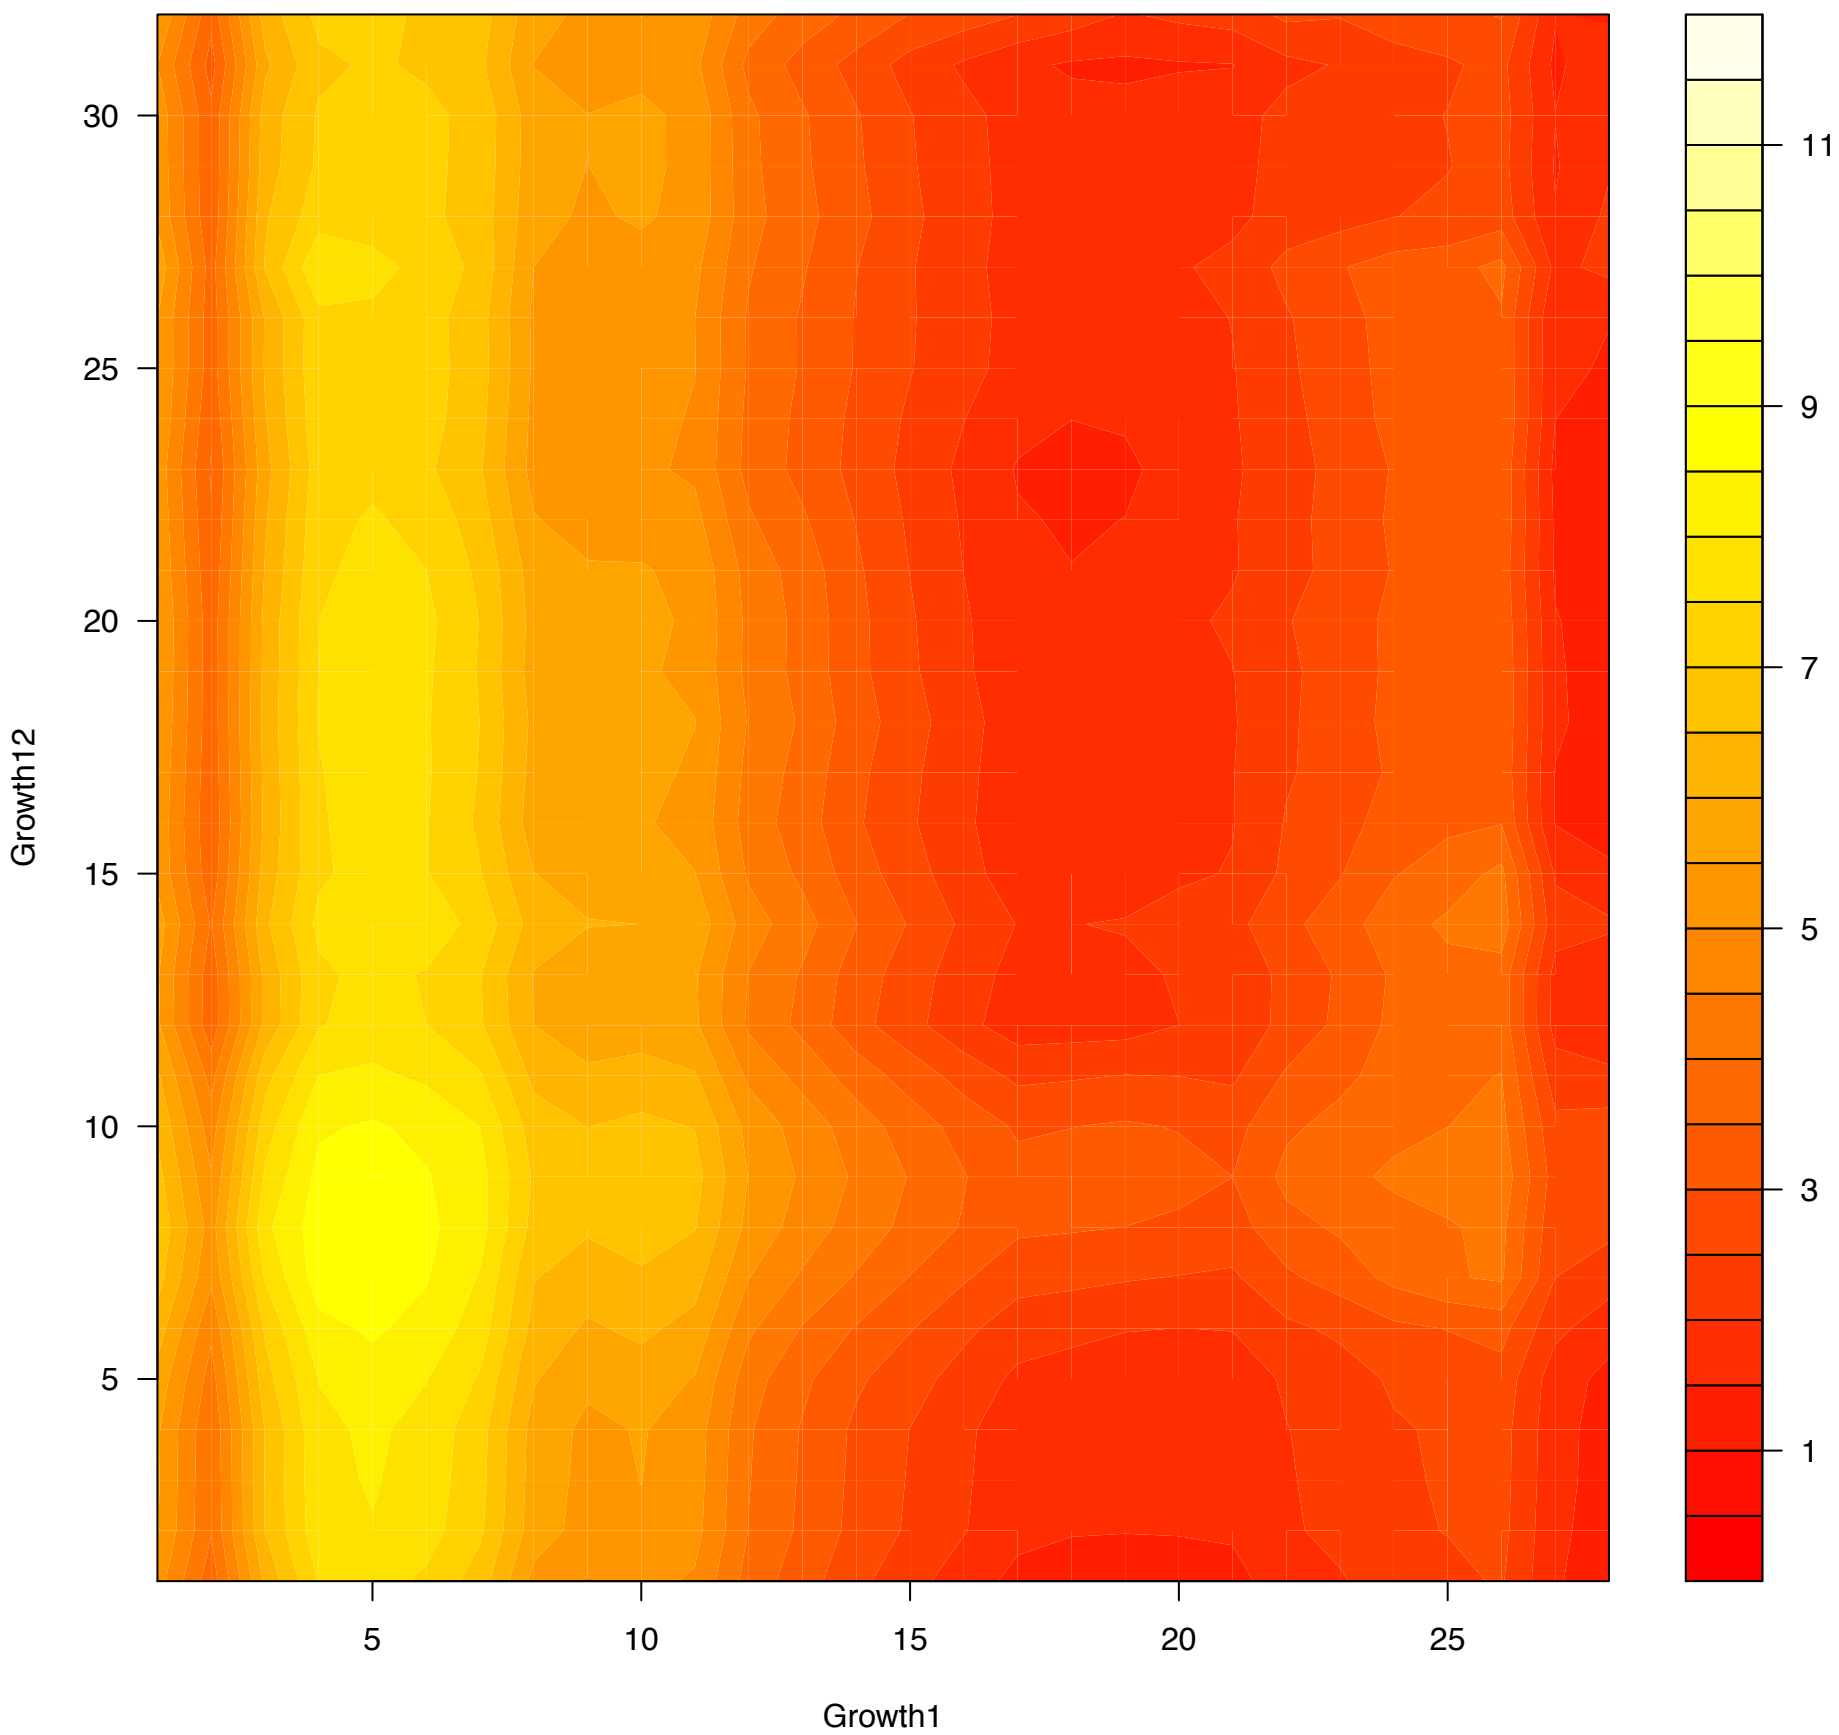



F values

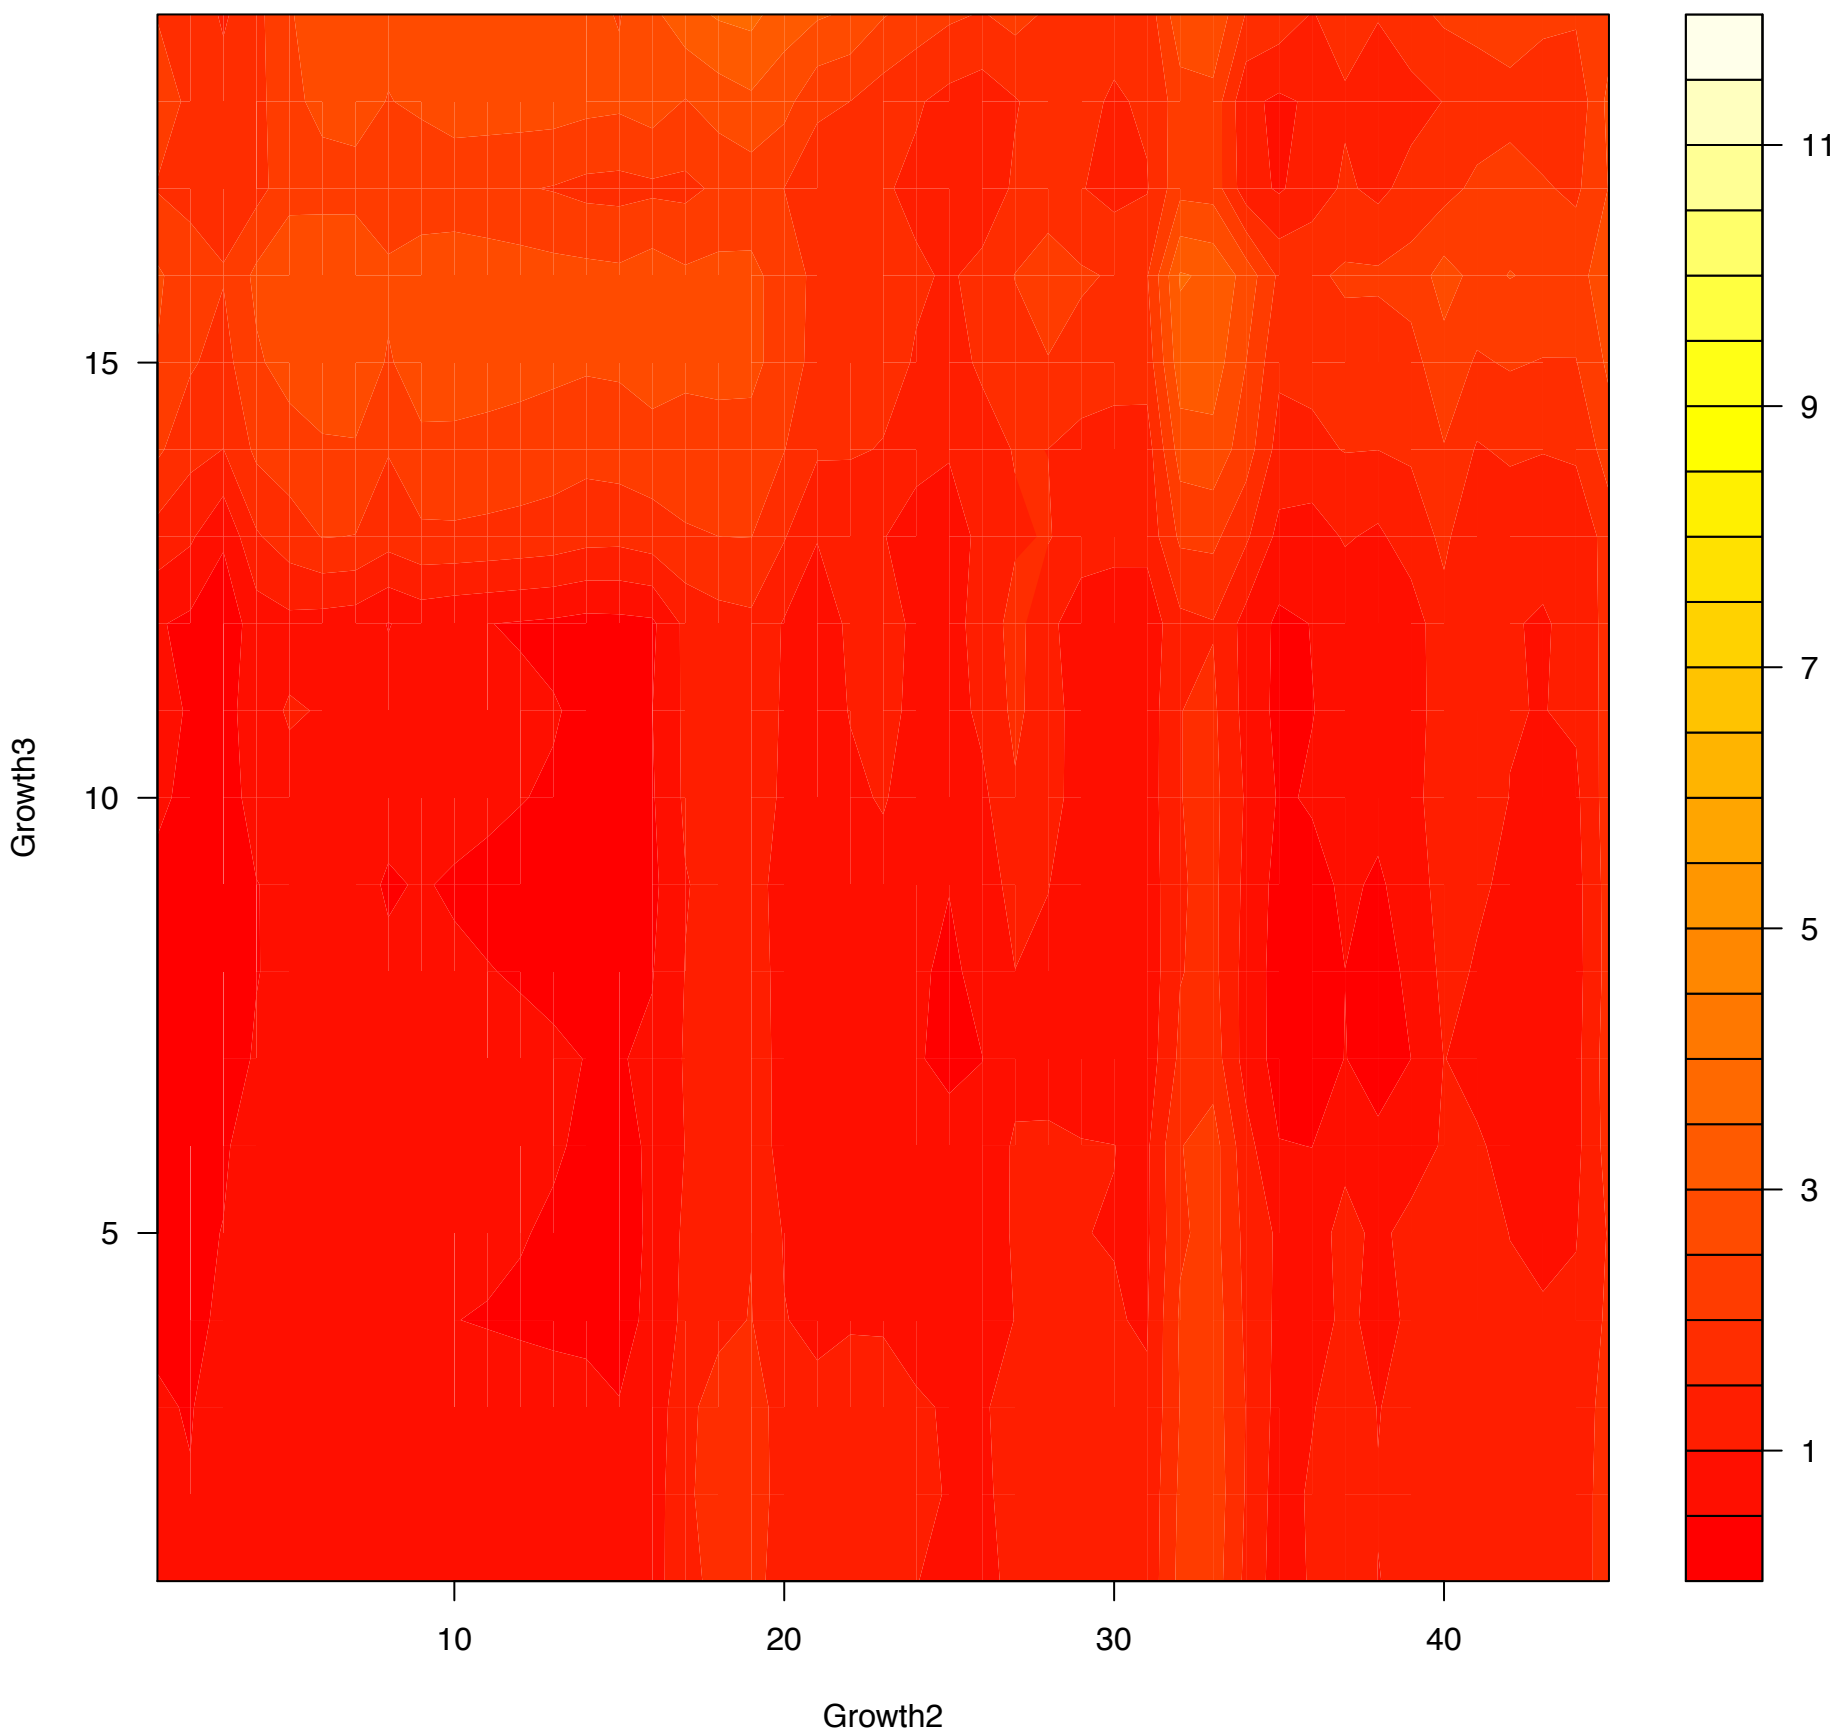

**F values**

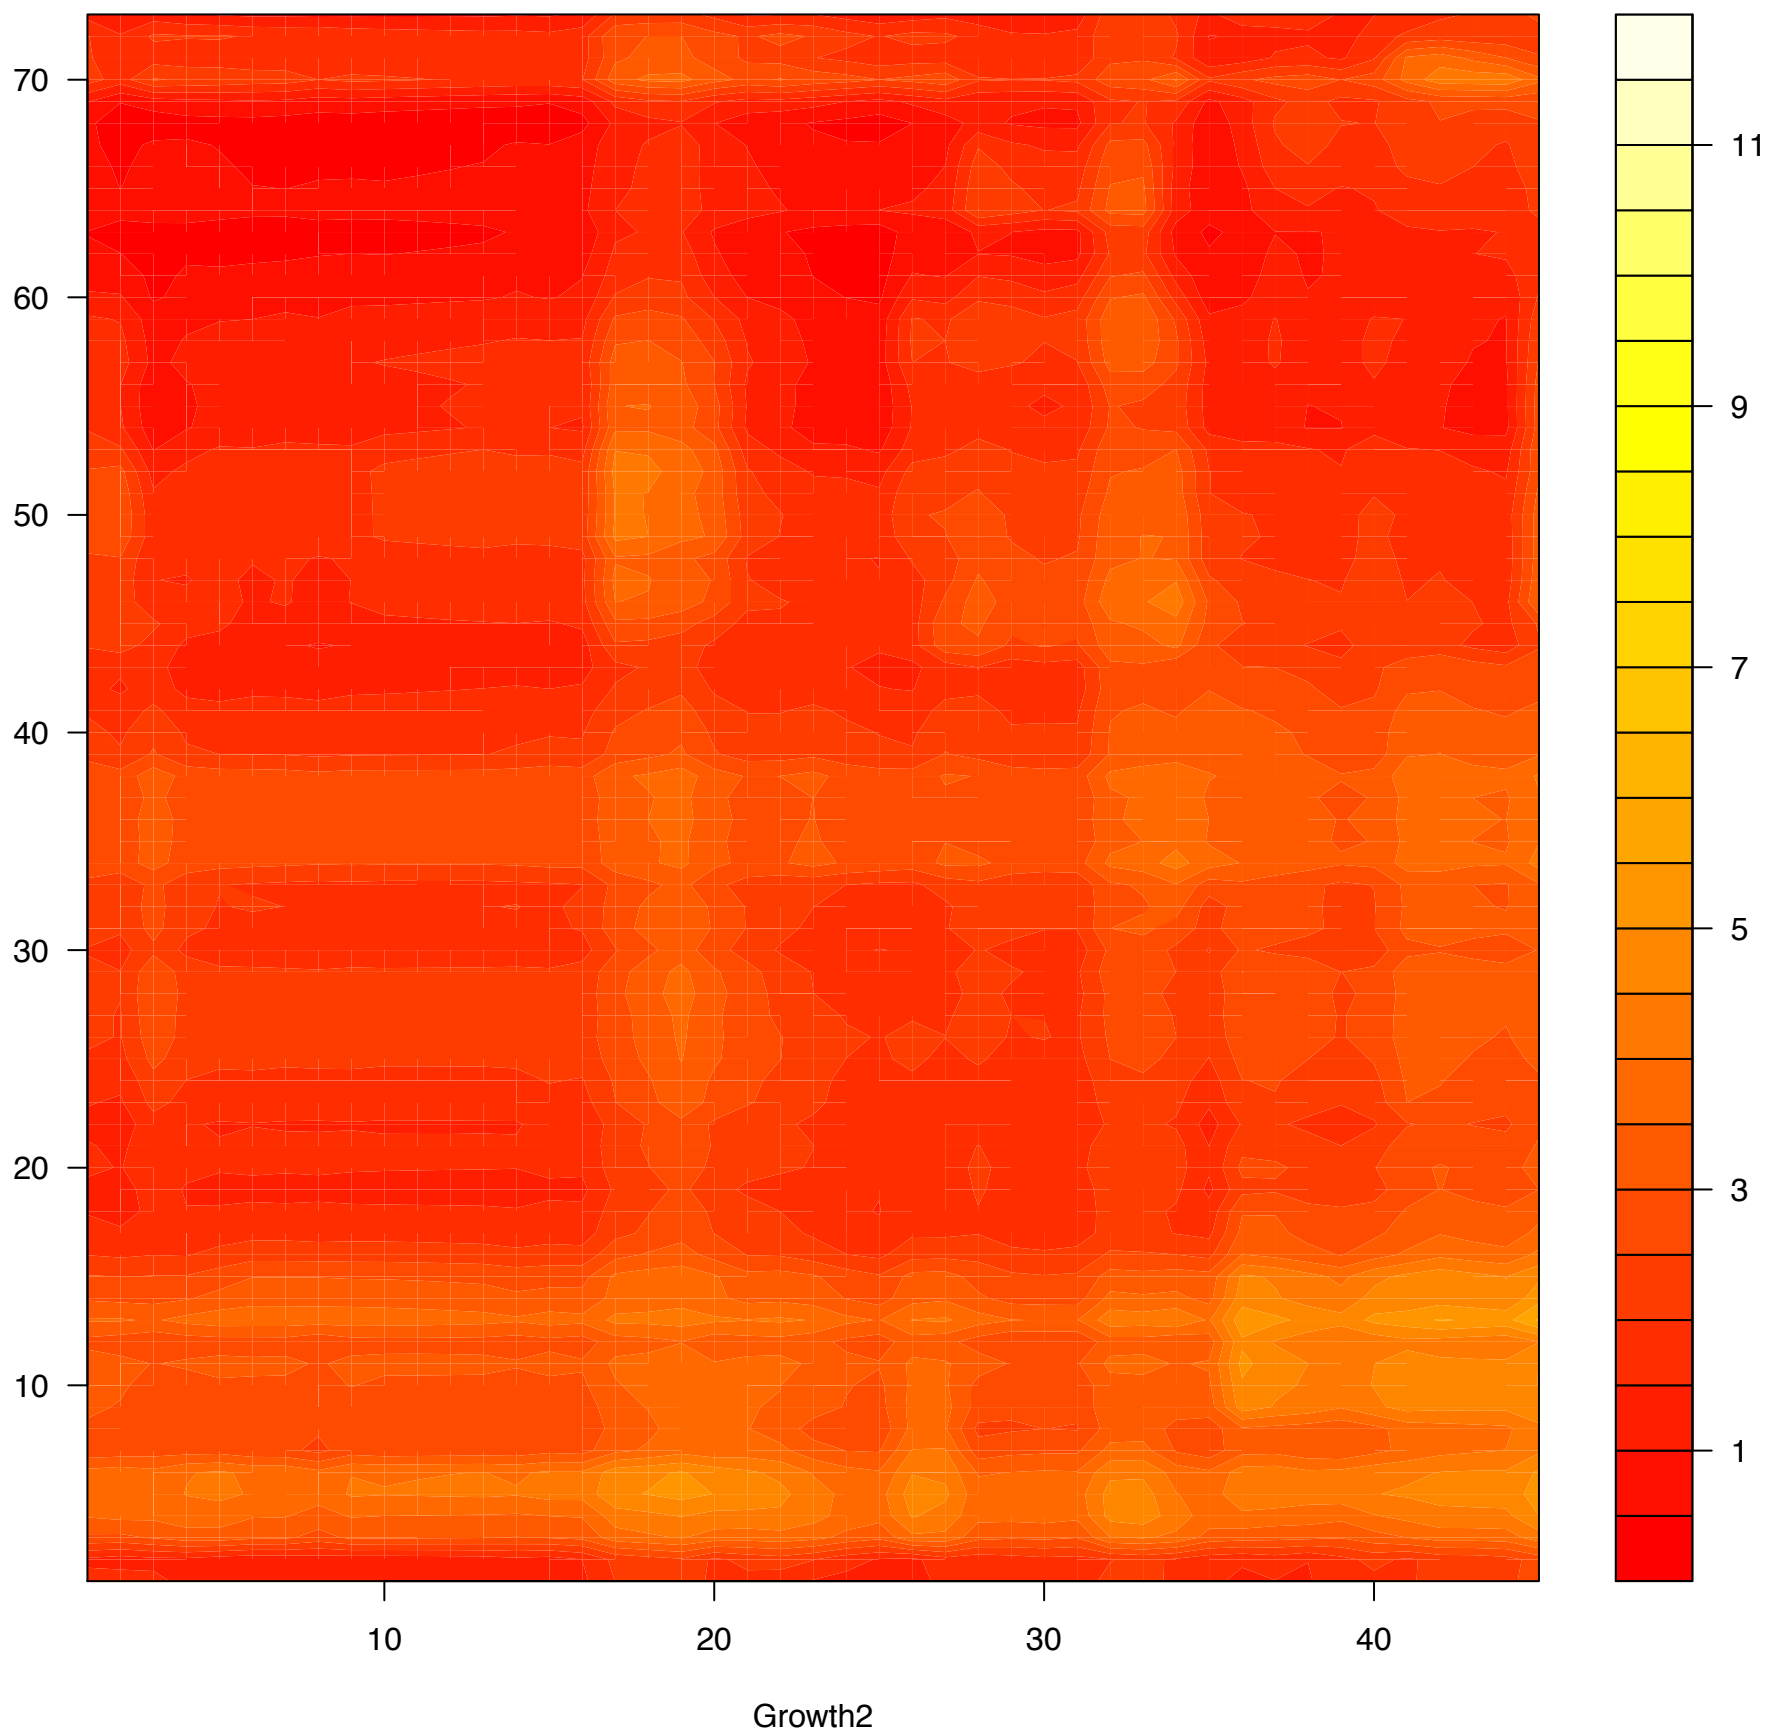

F values

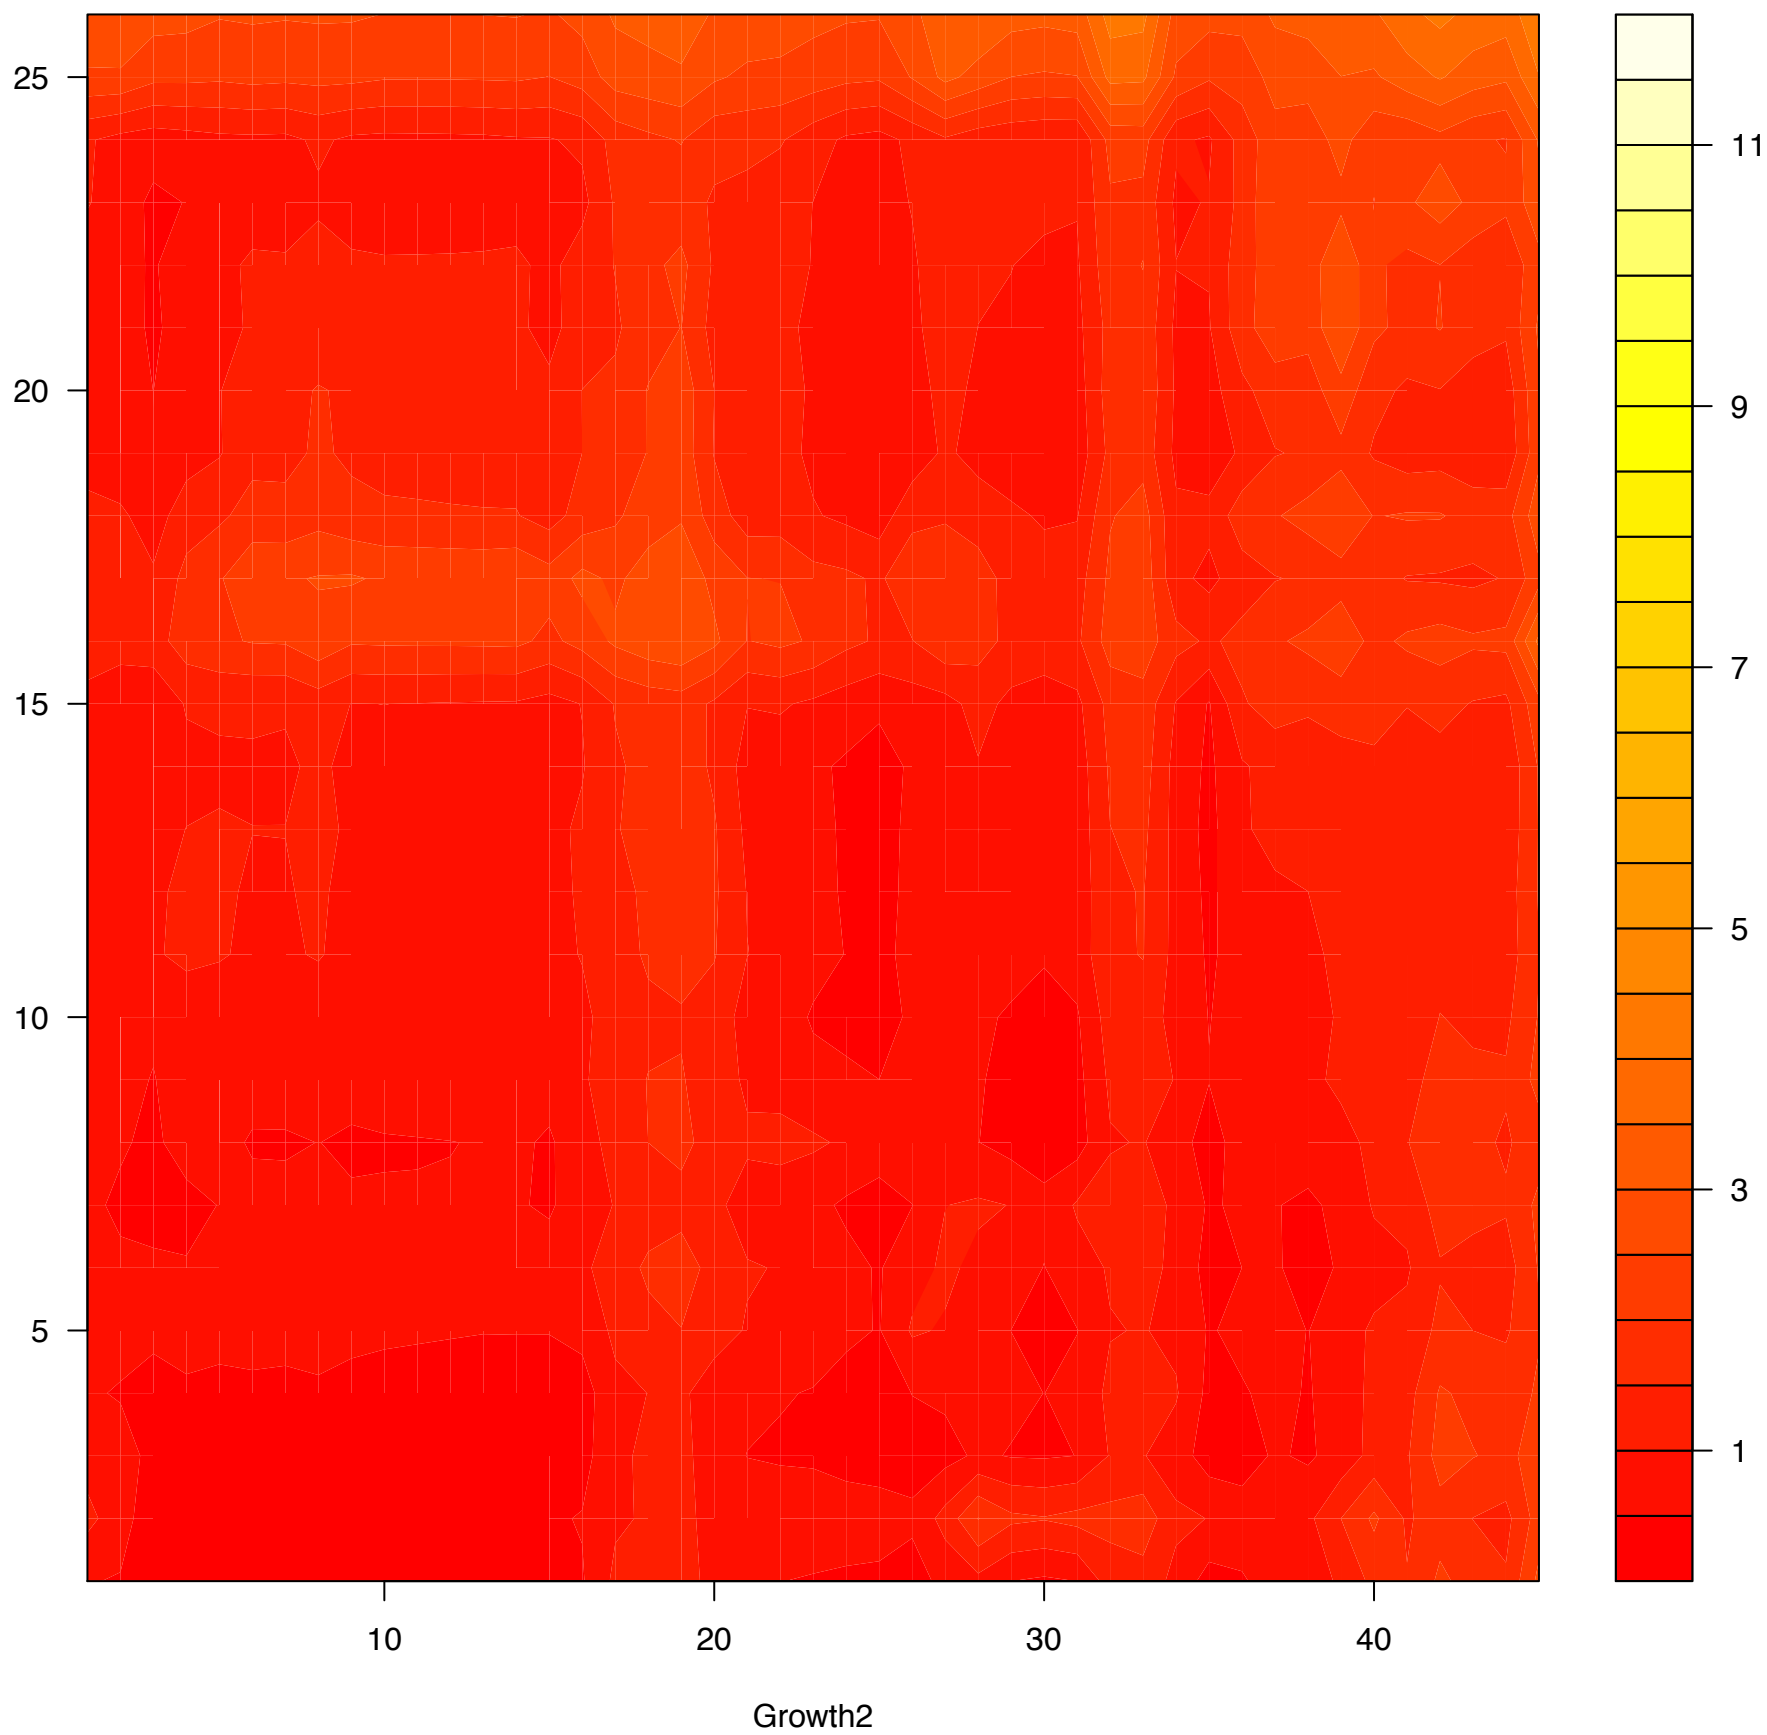

F values

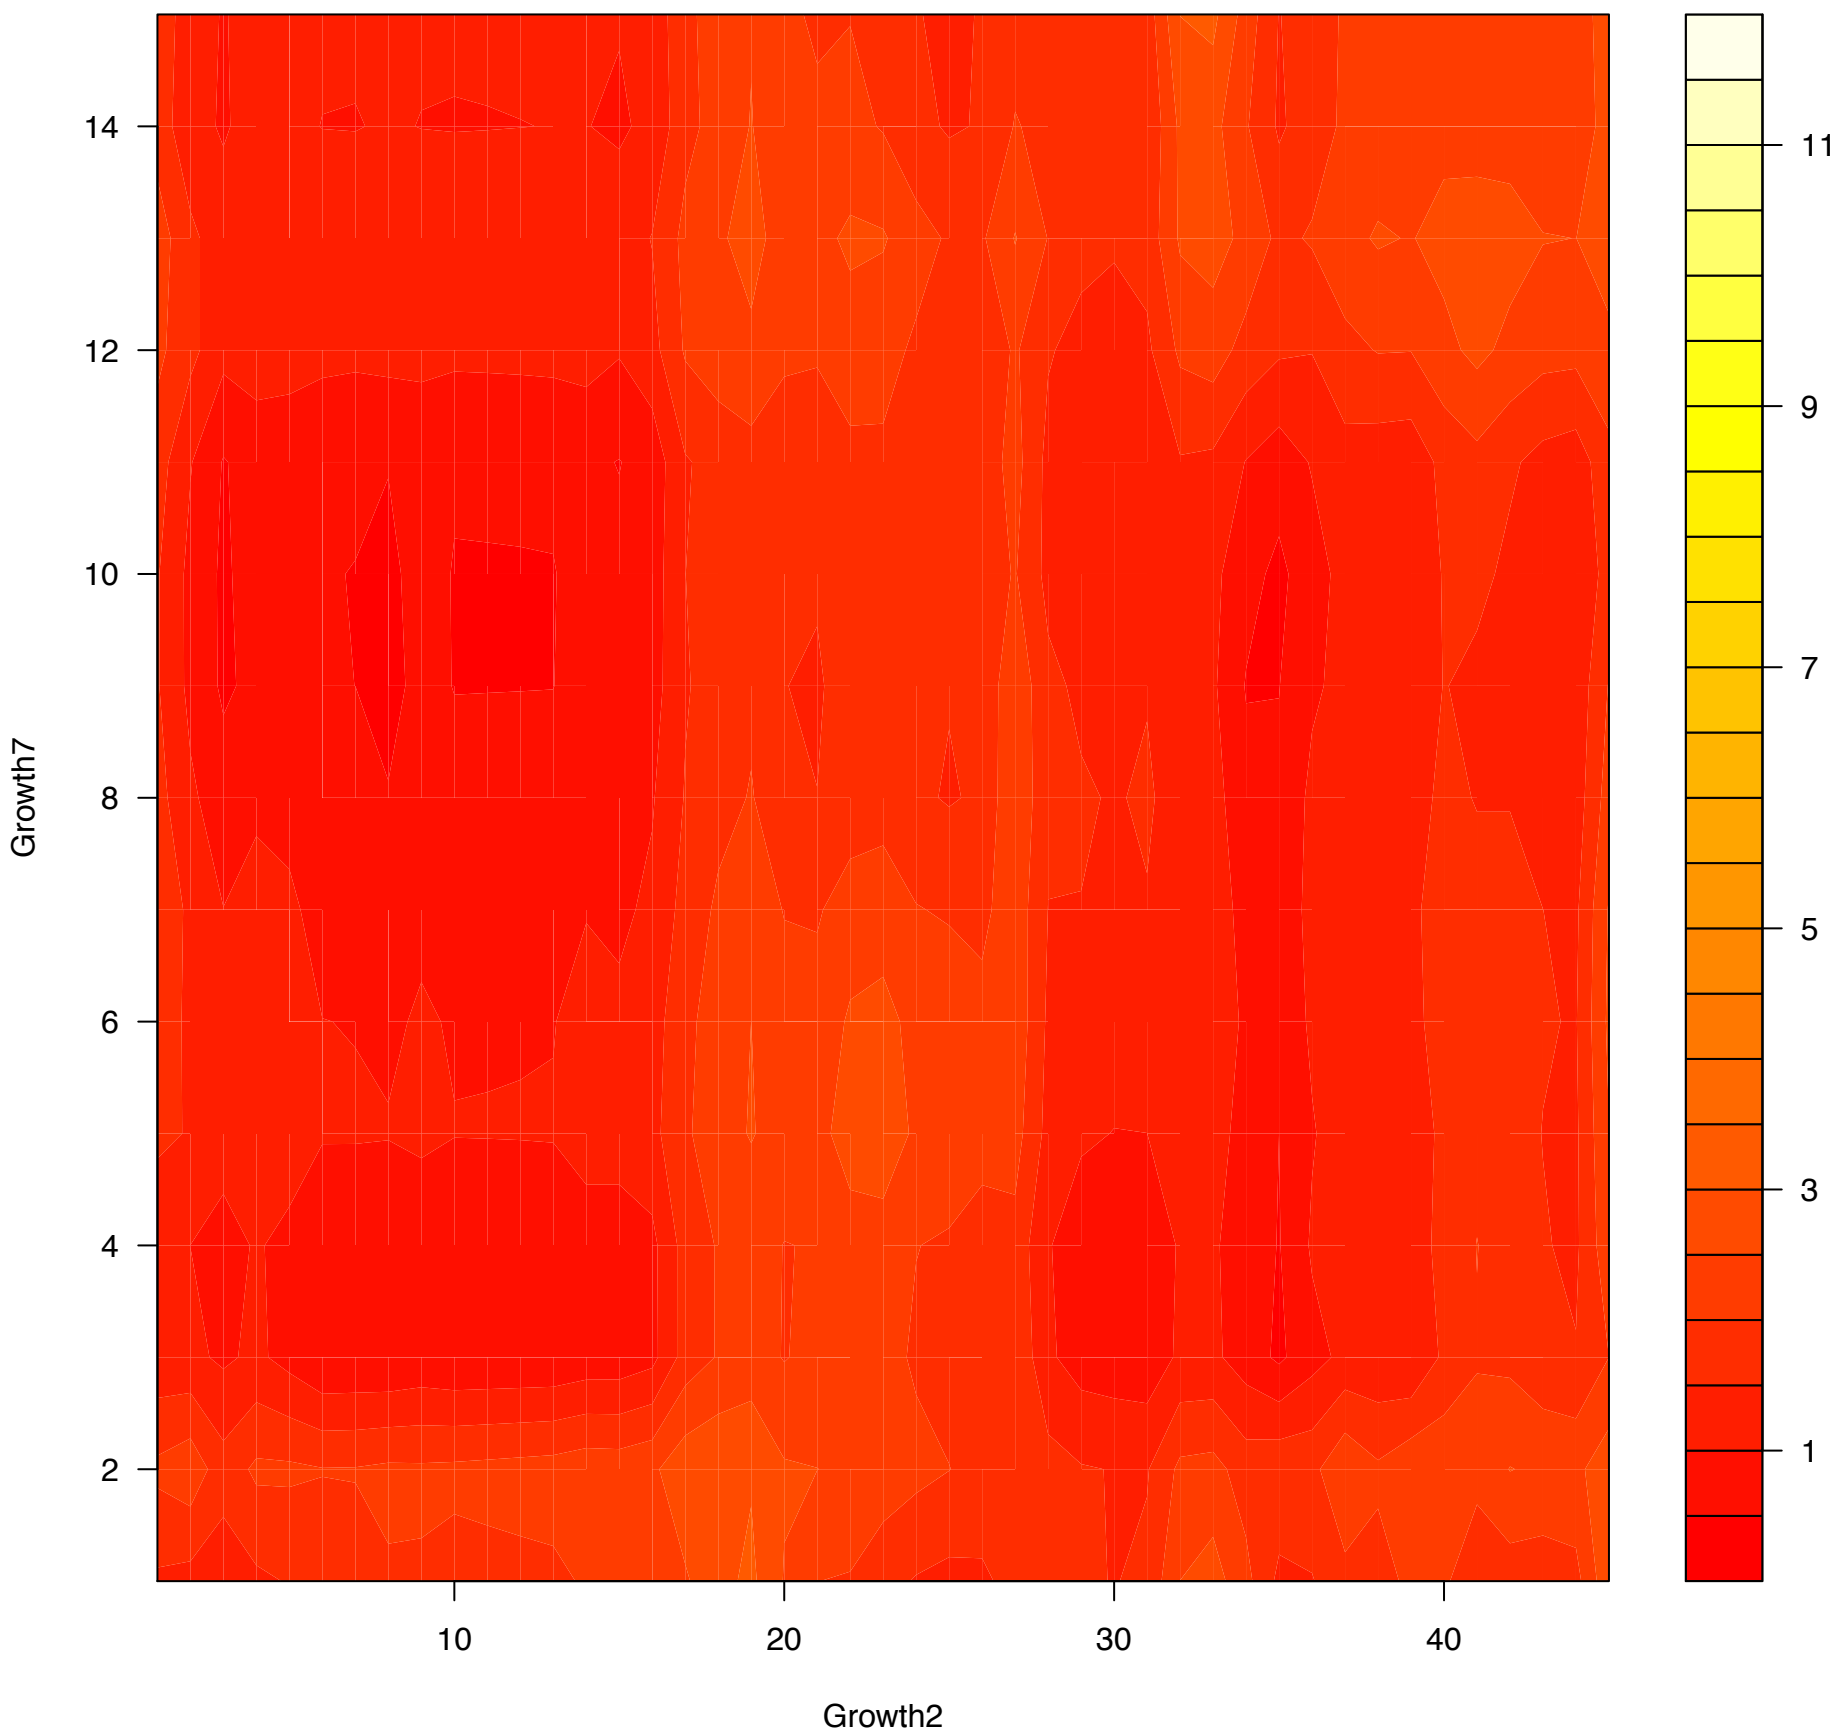

F values

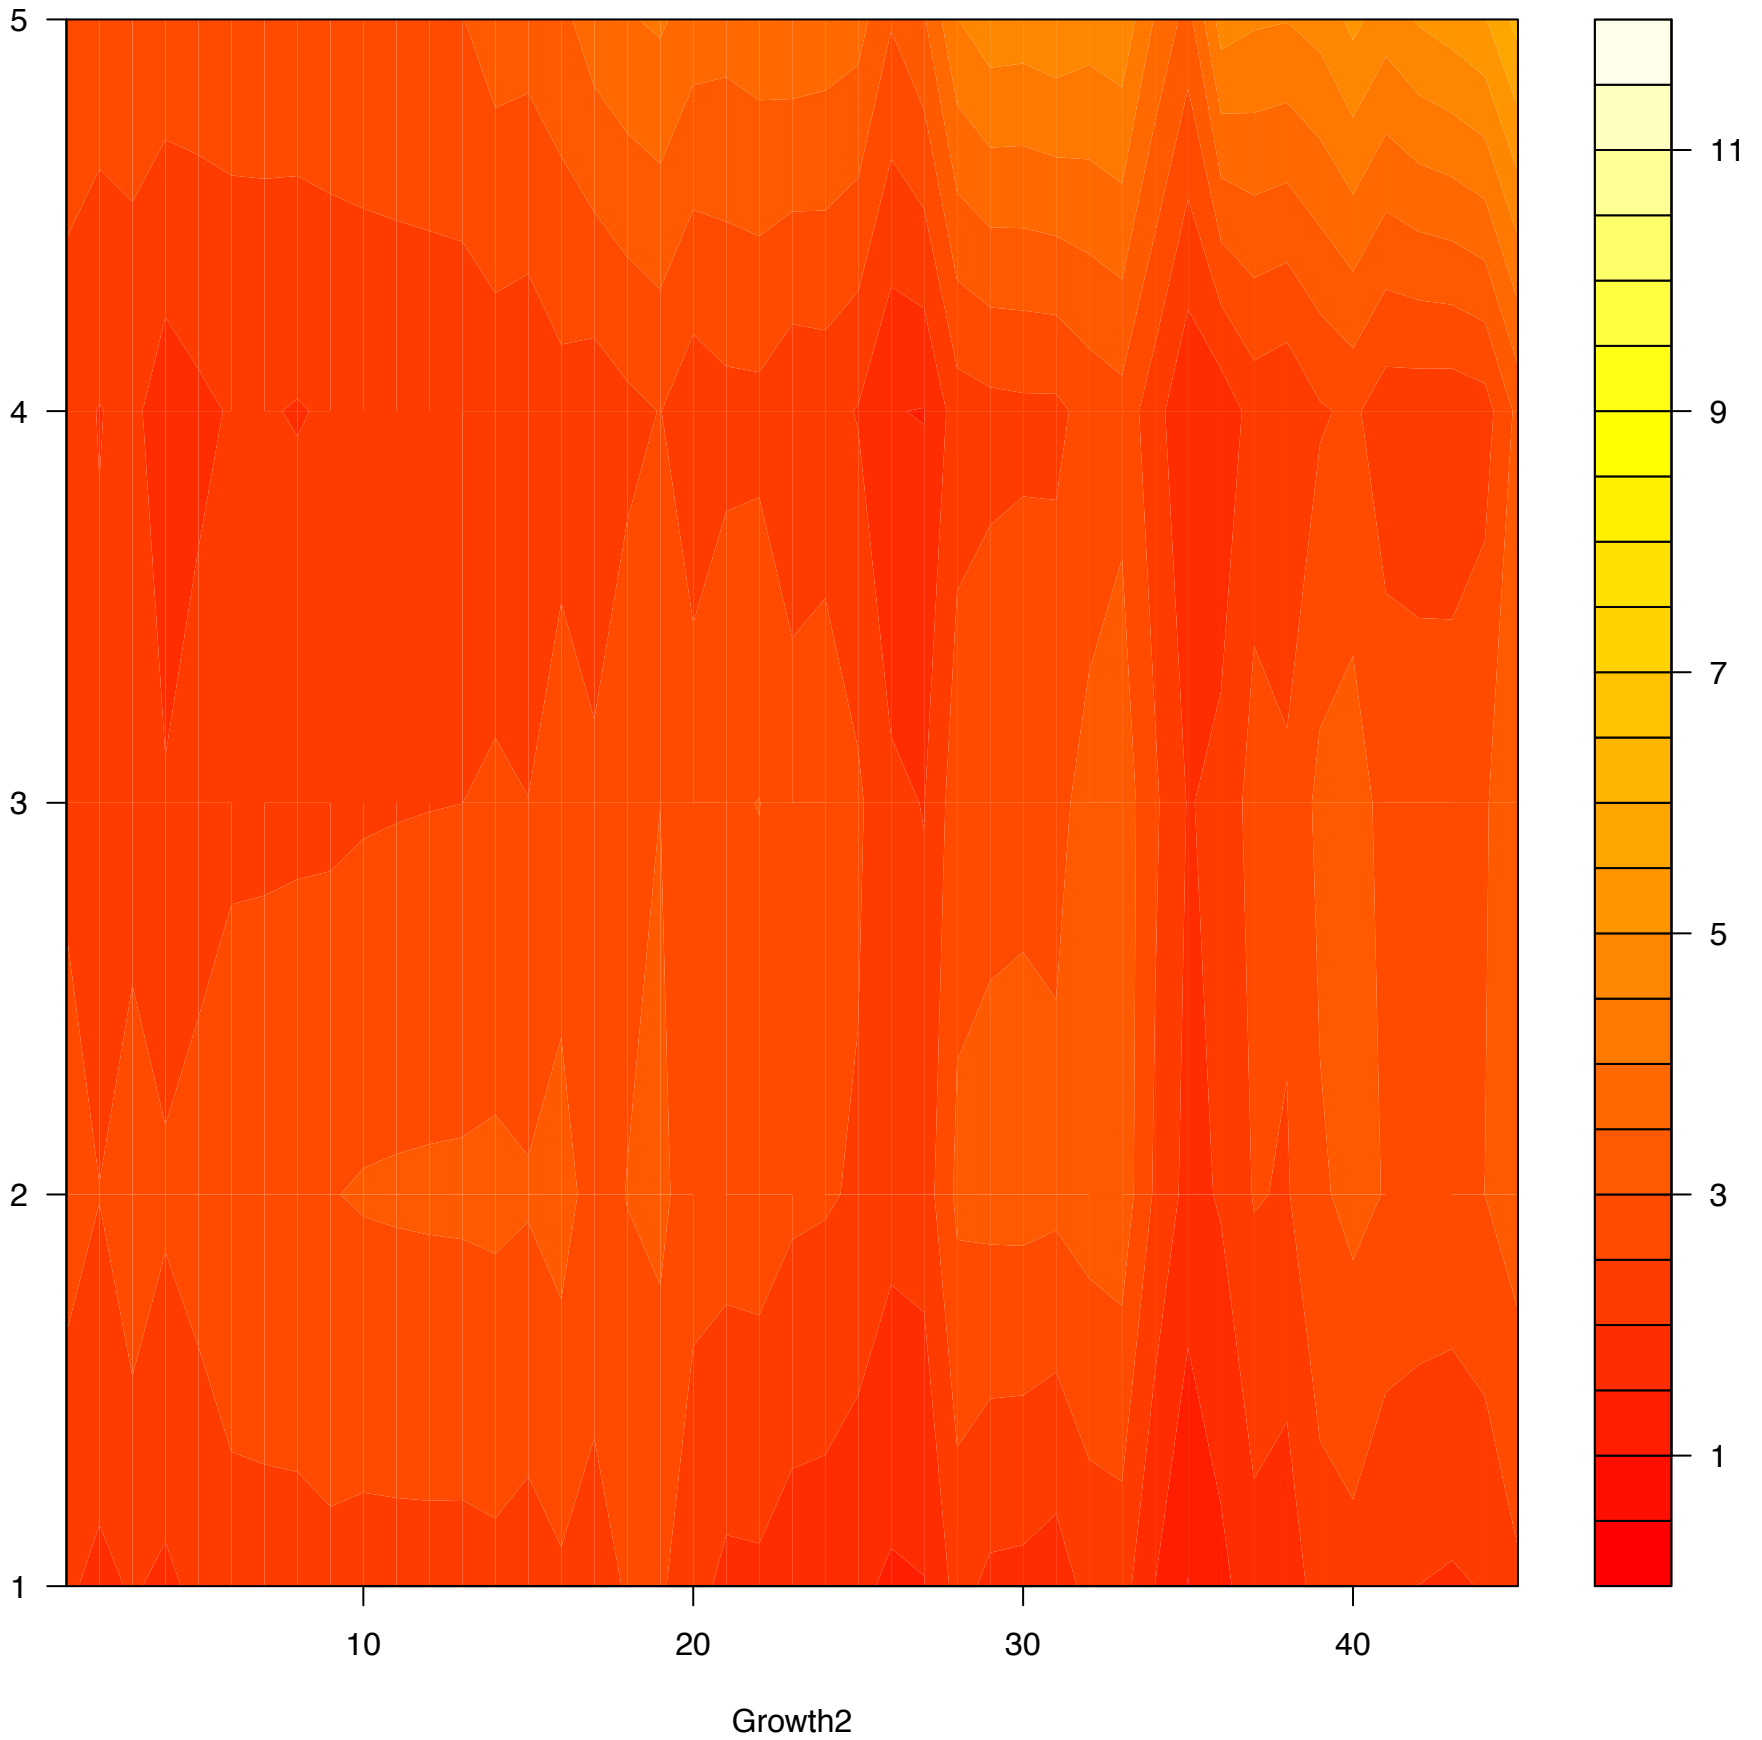

**F values**

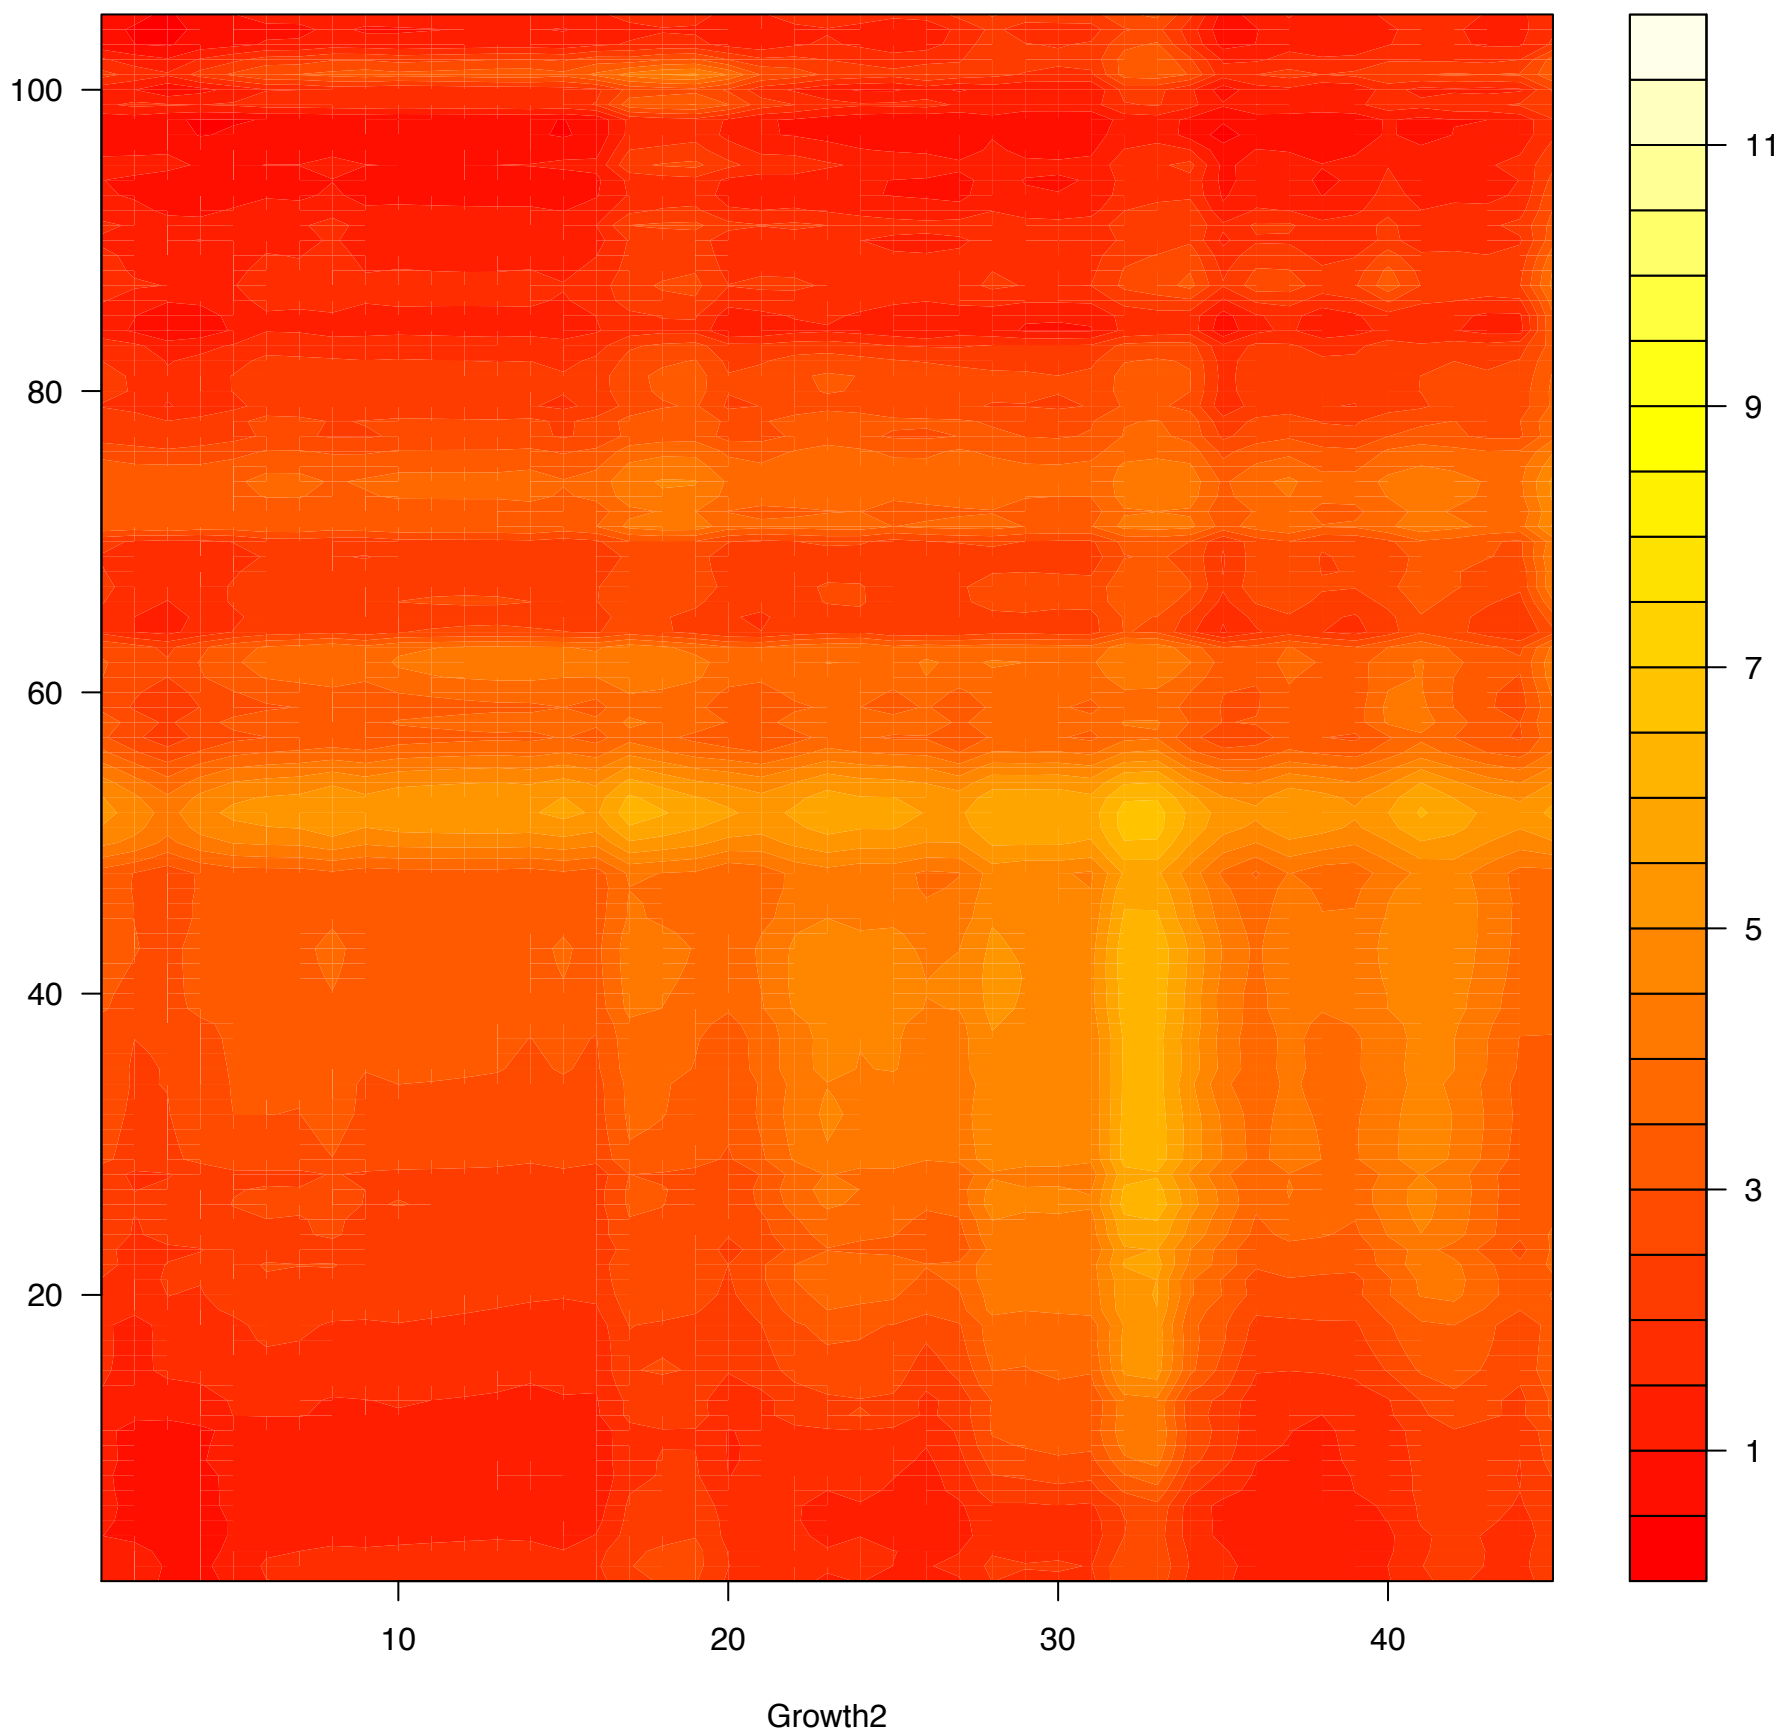

**F values**

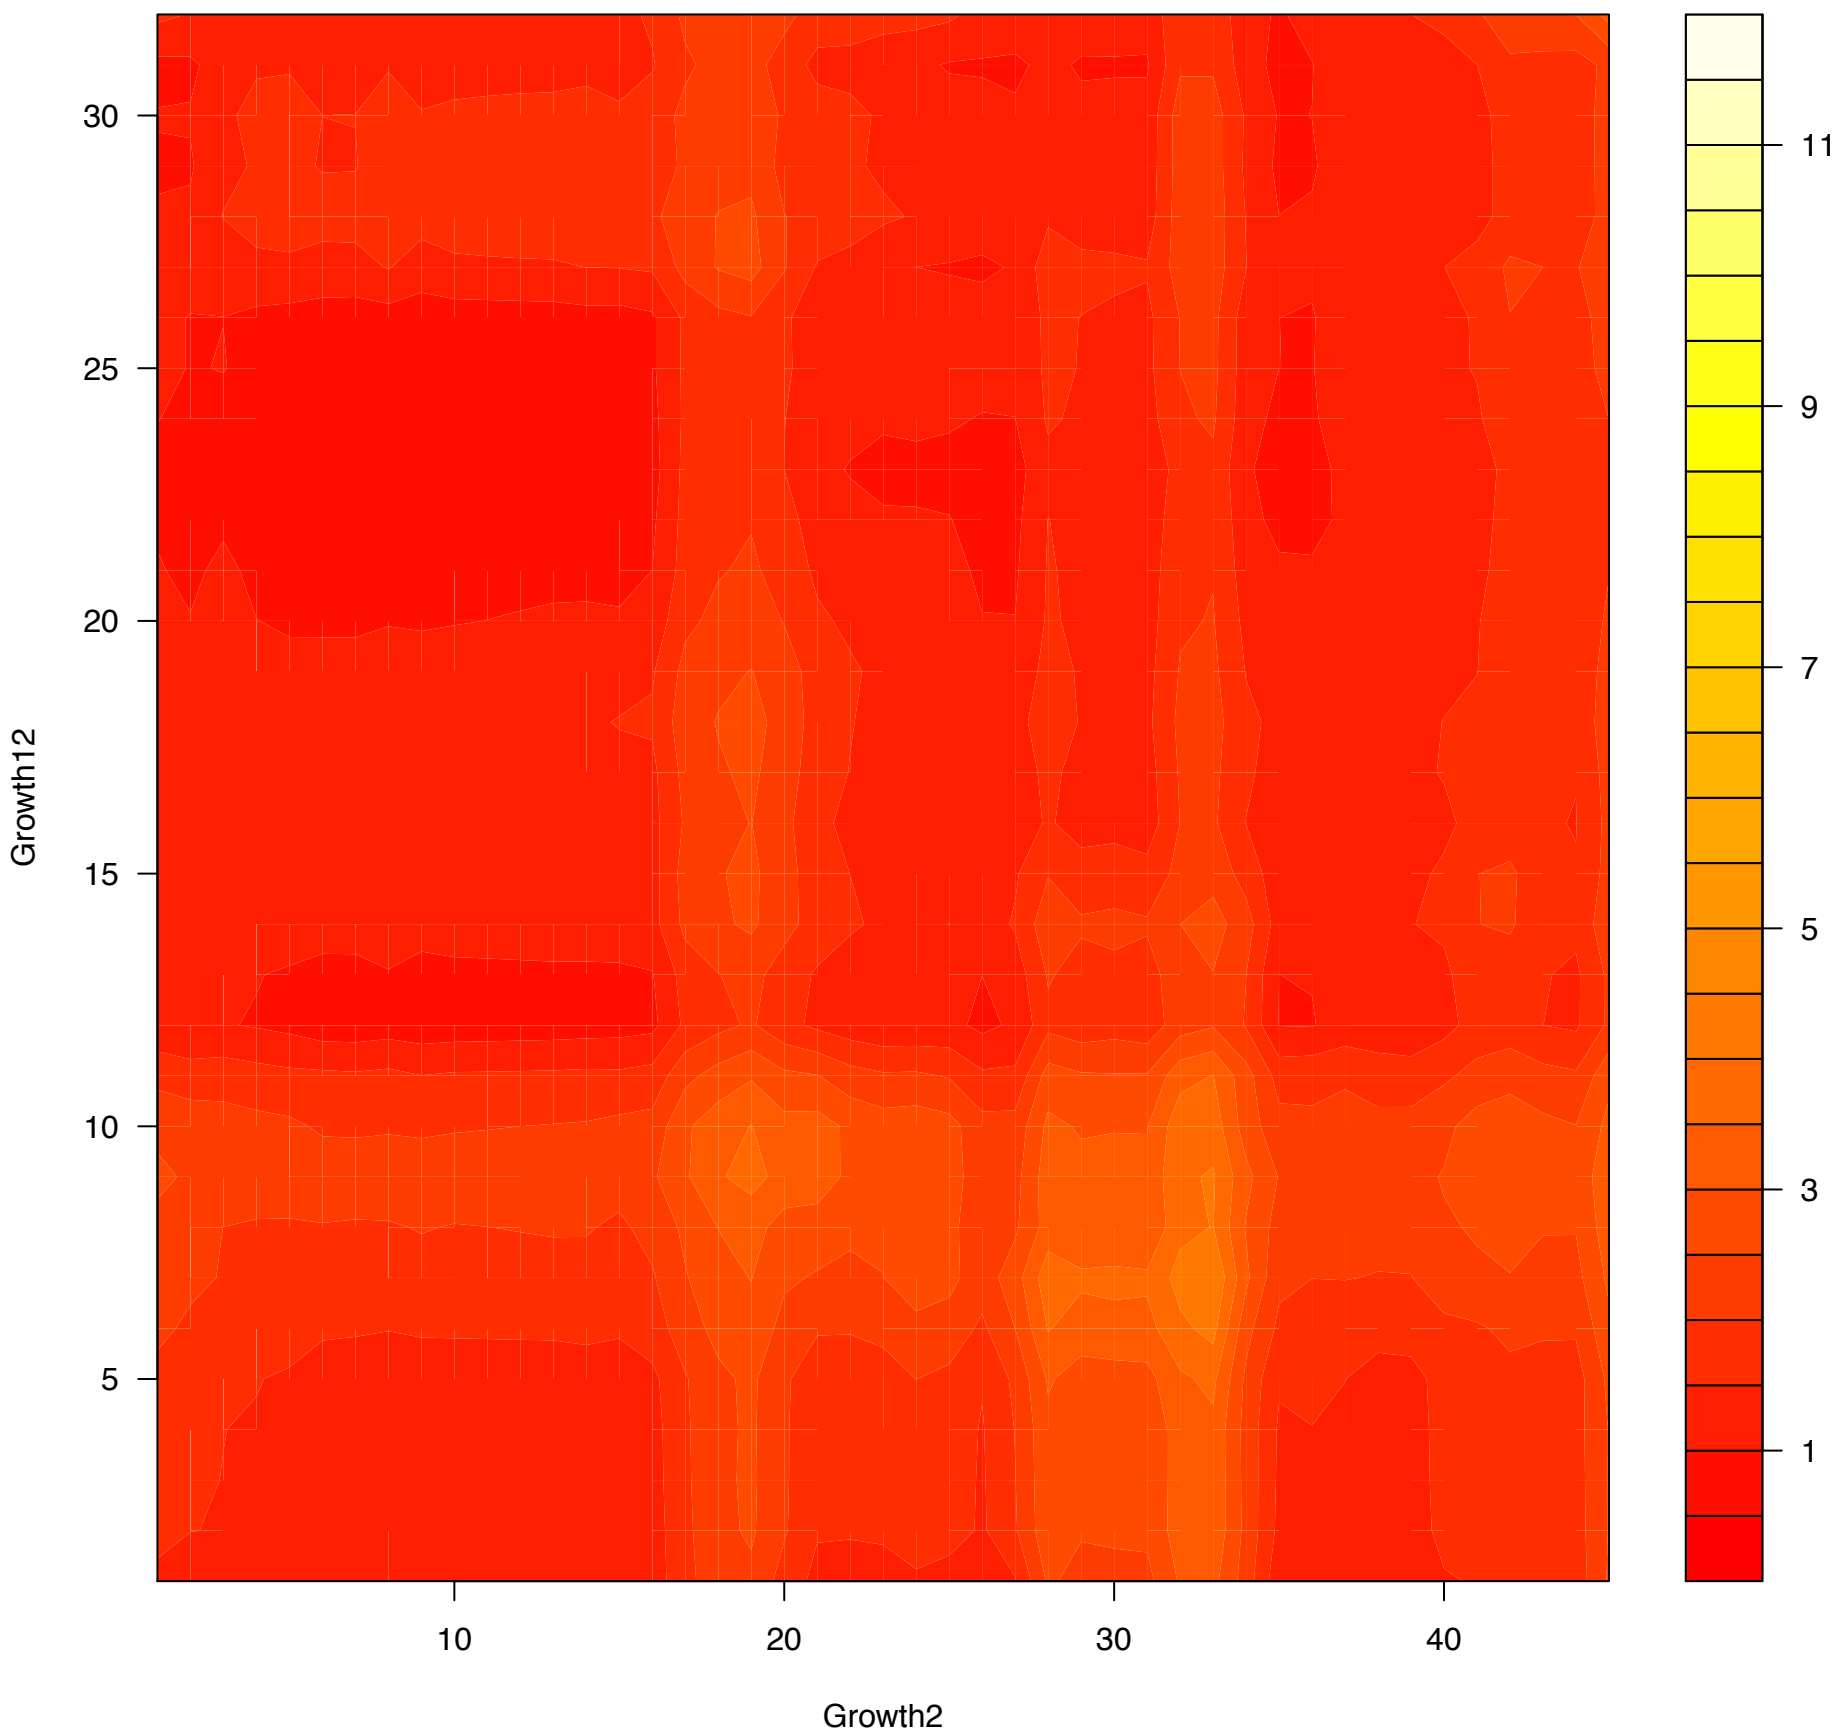

**F values**

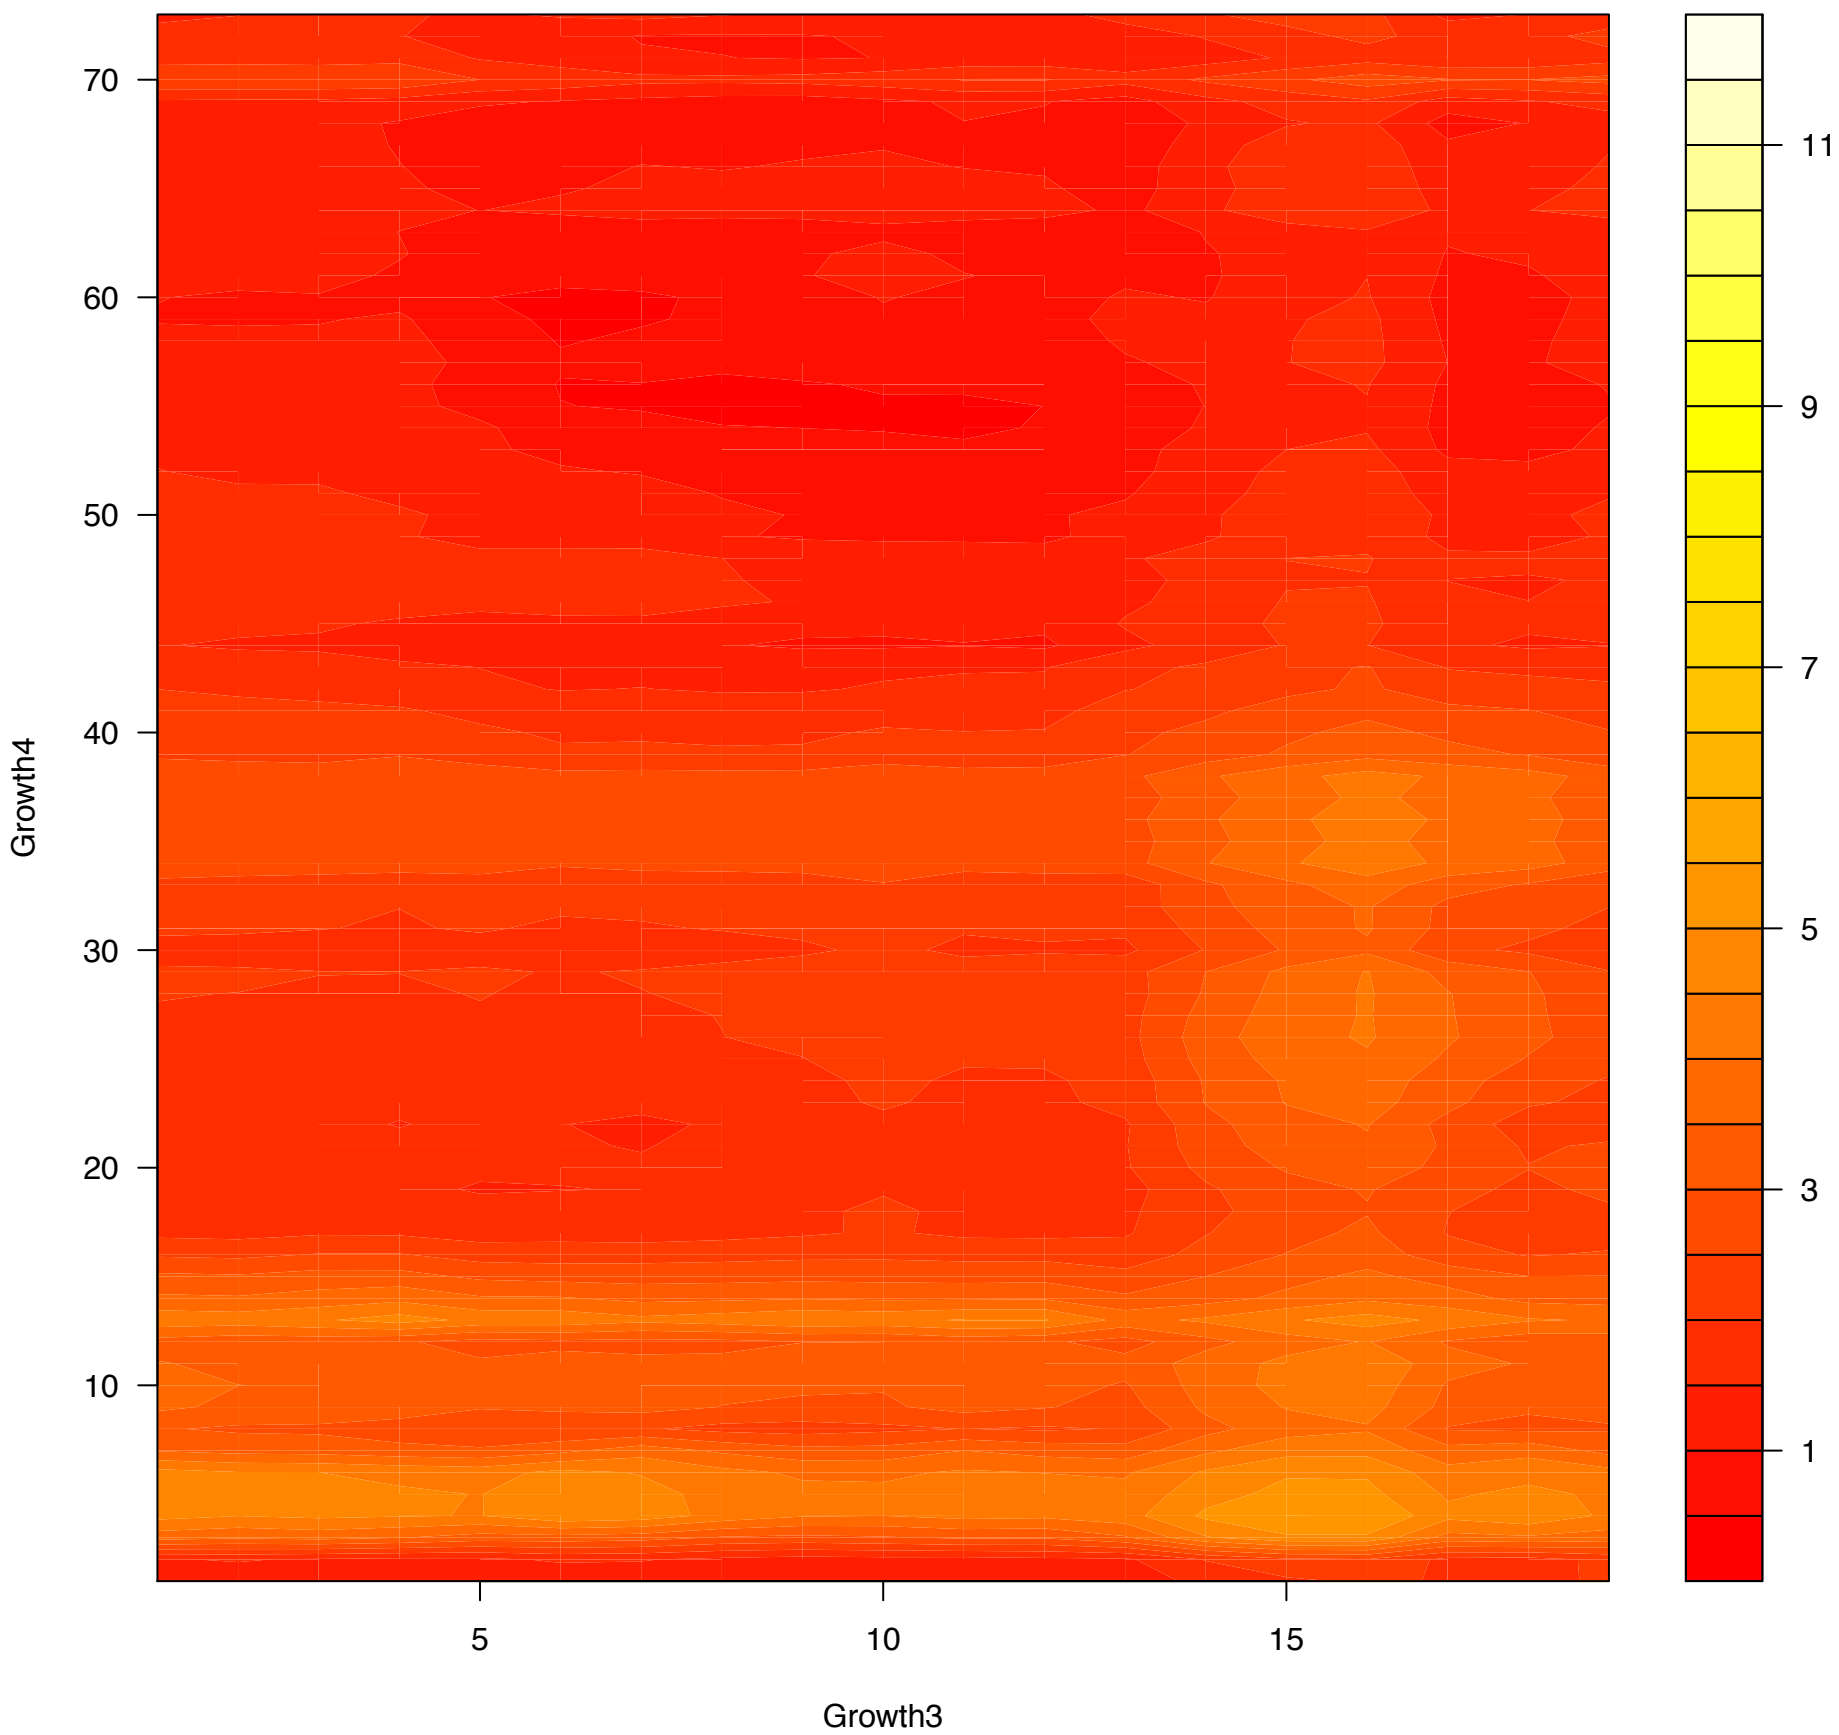



**F values**

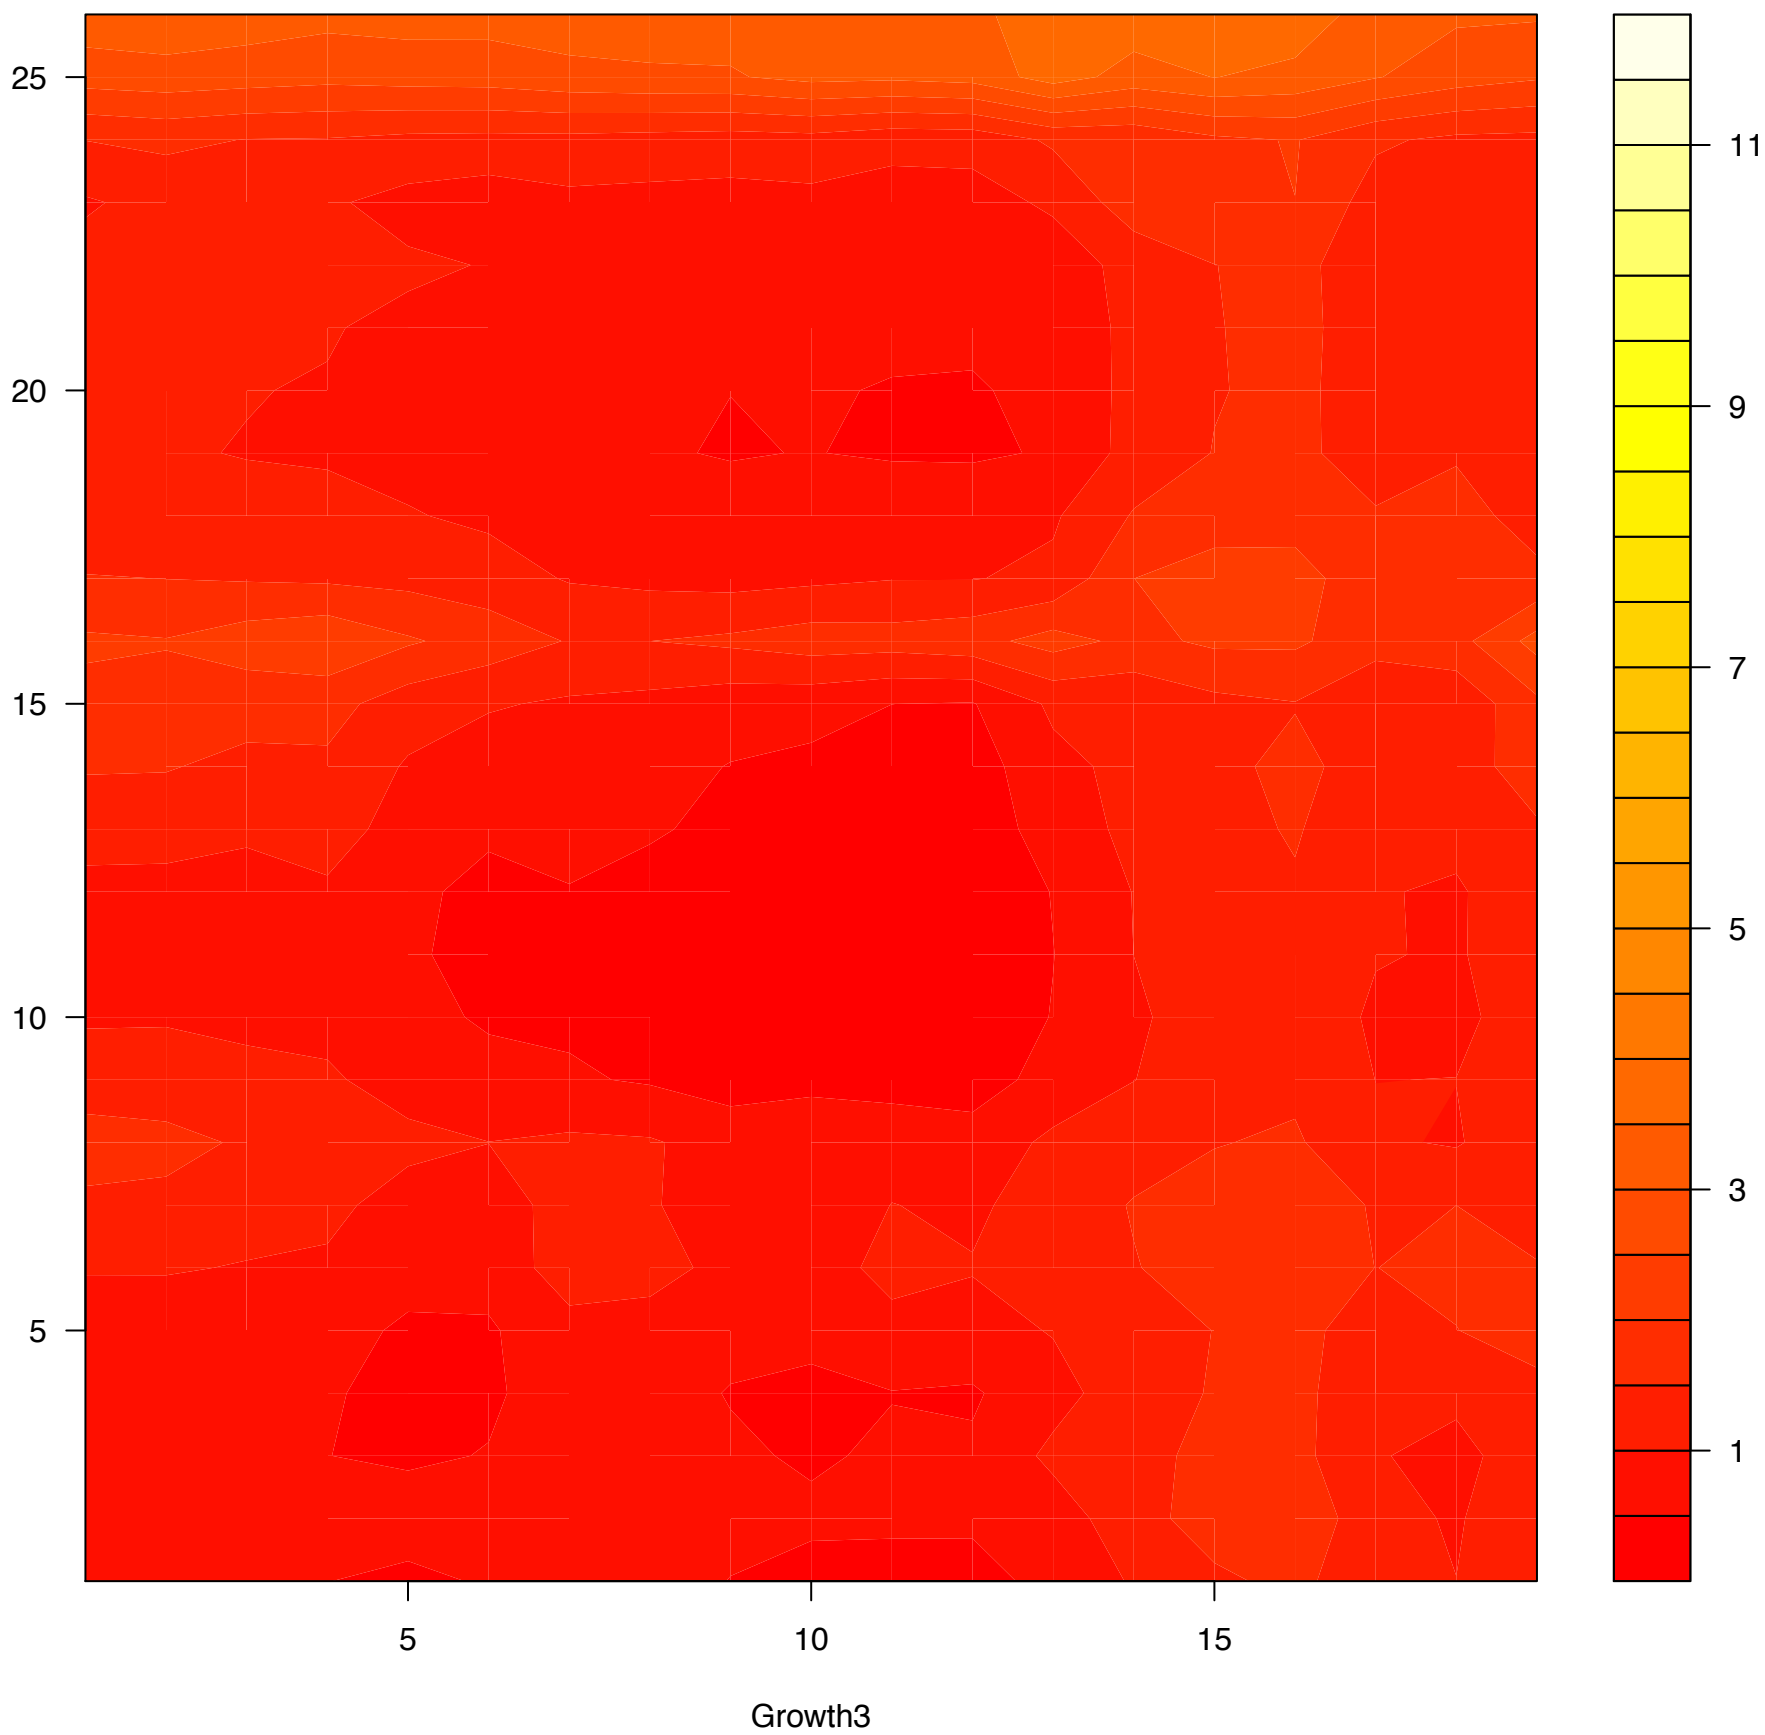

**F values**

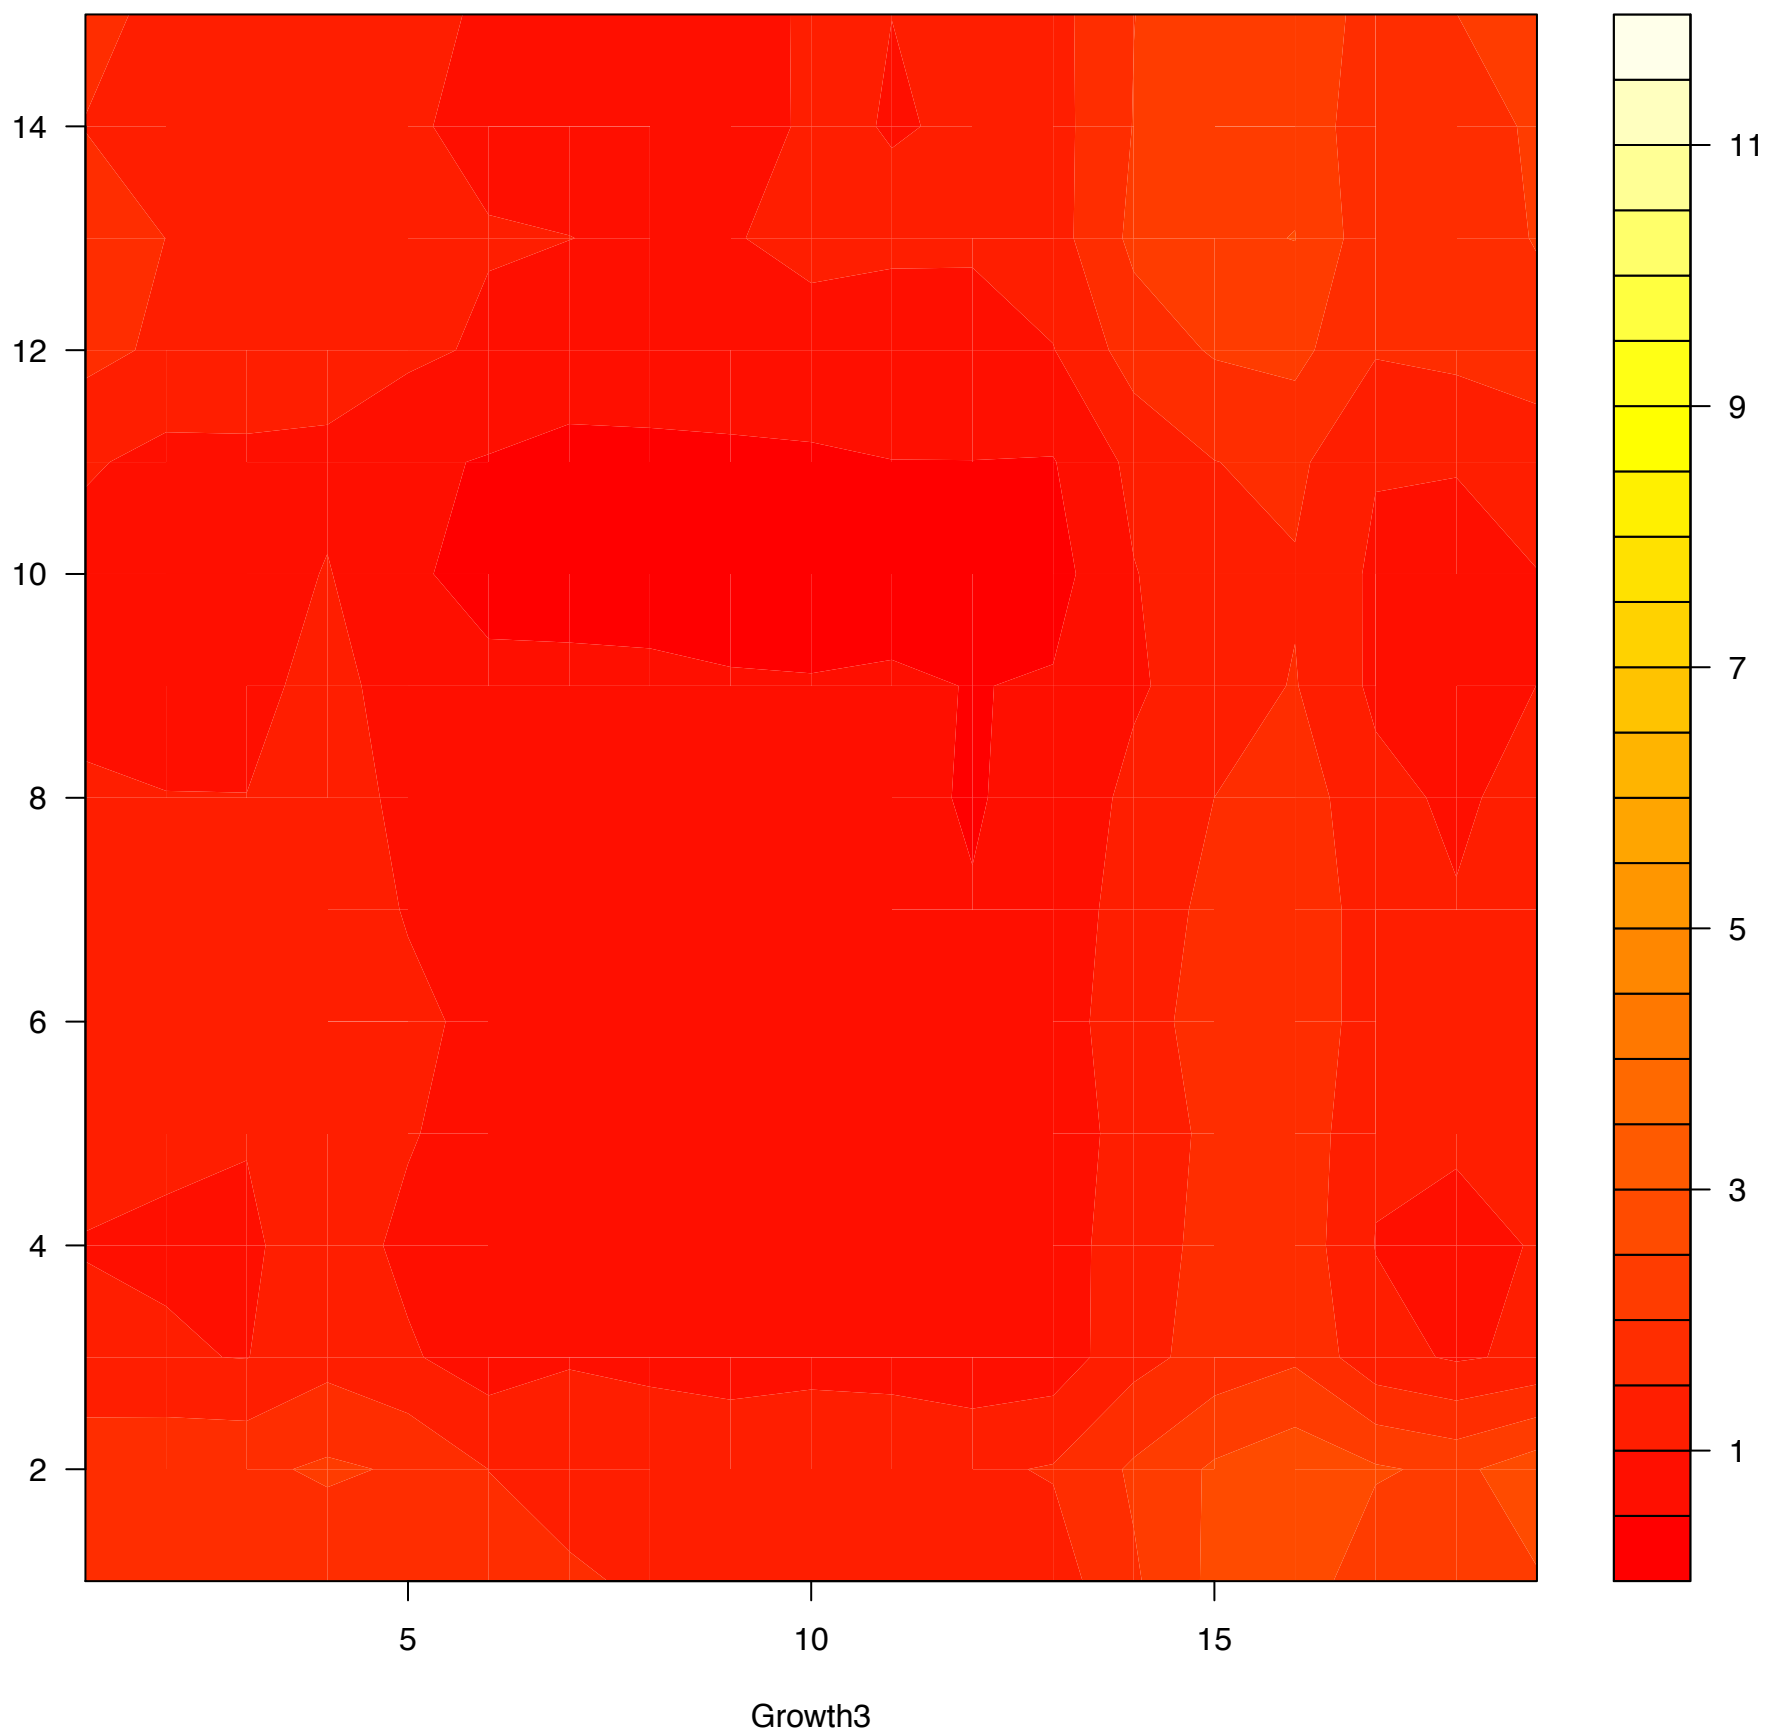

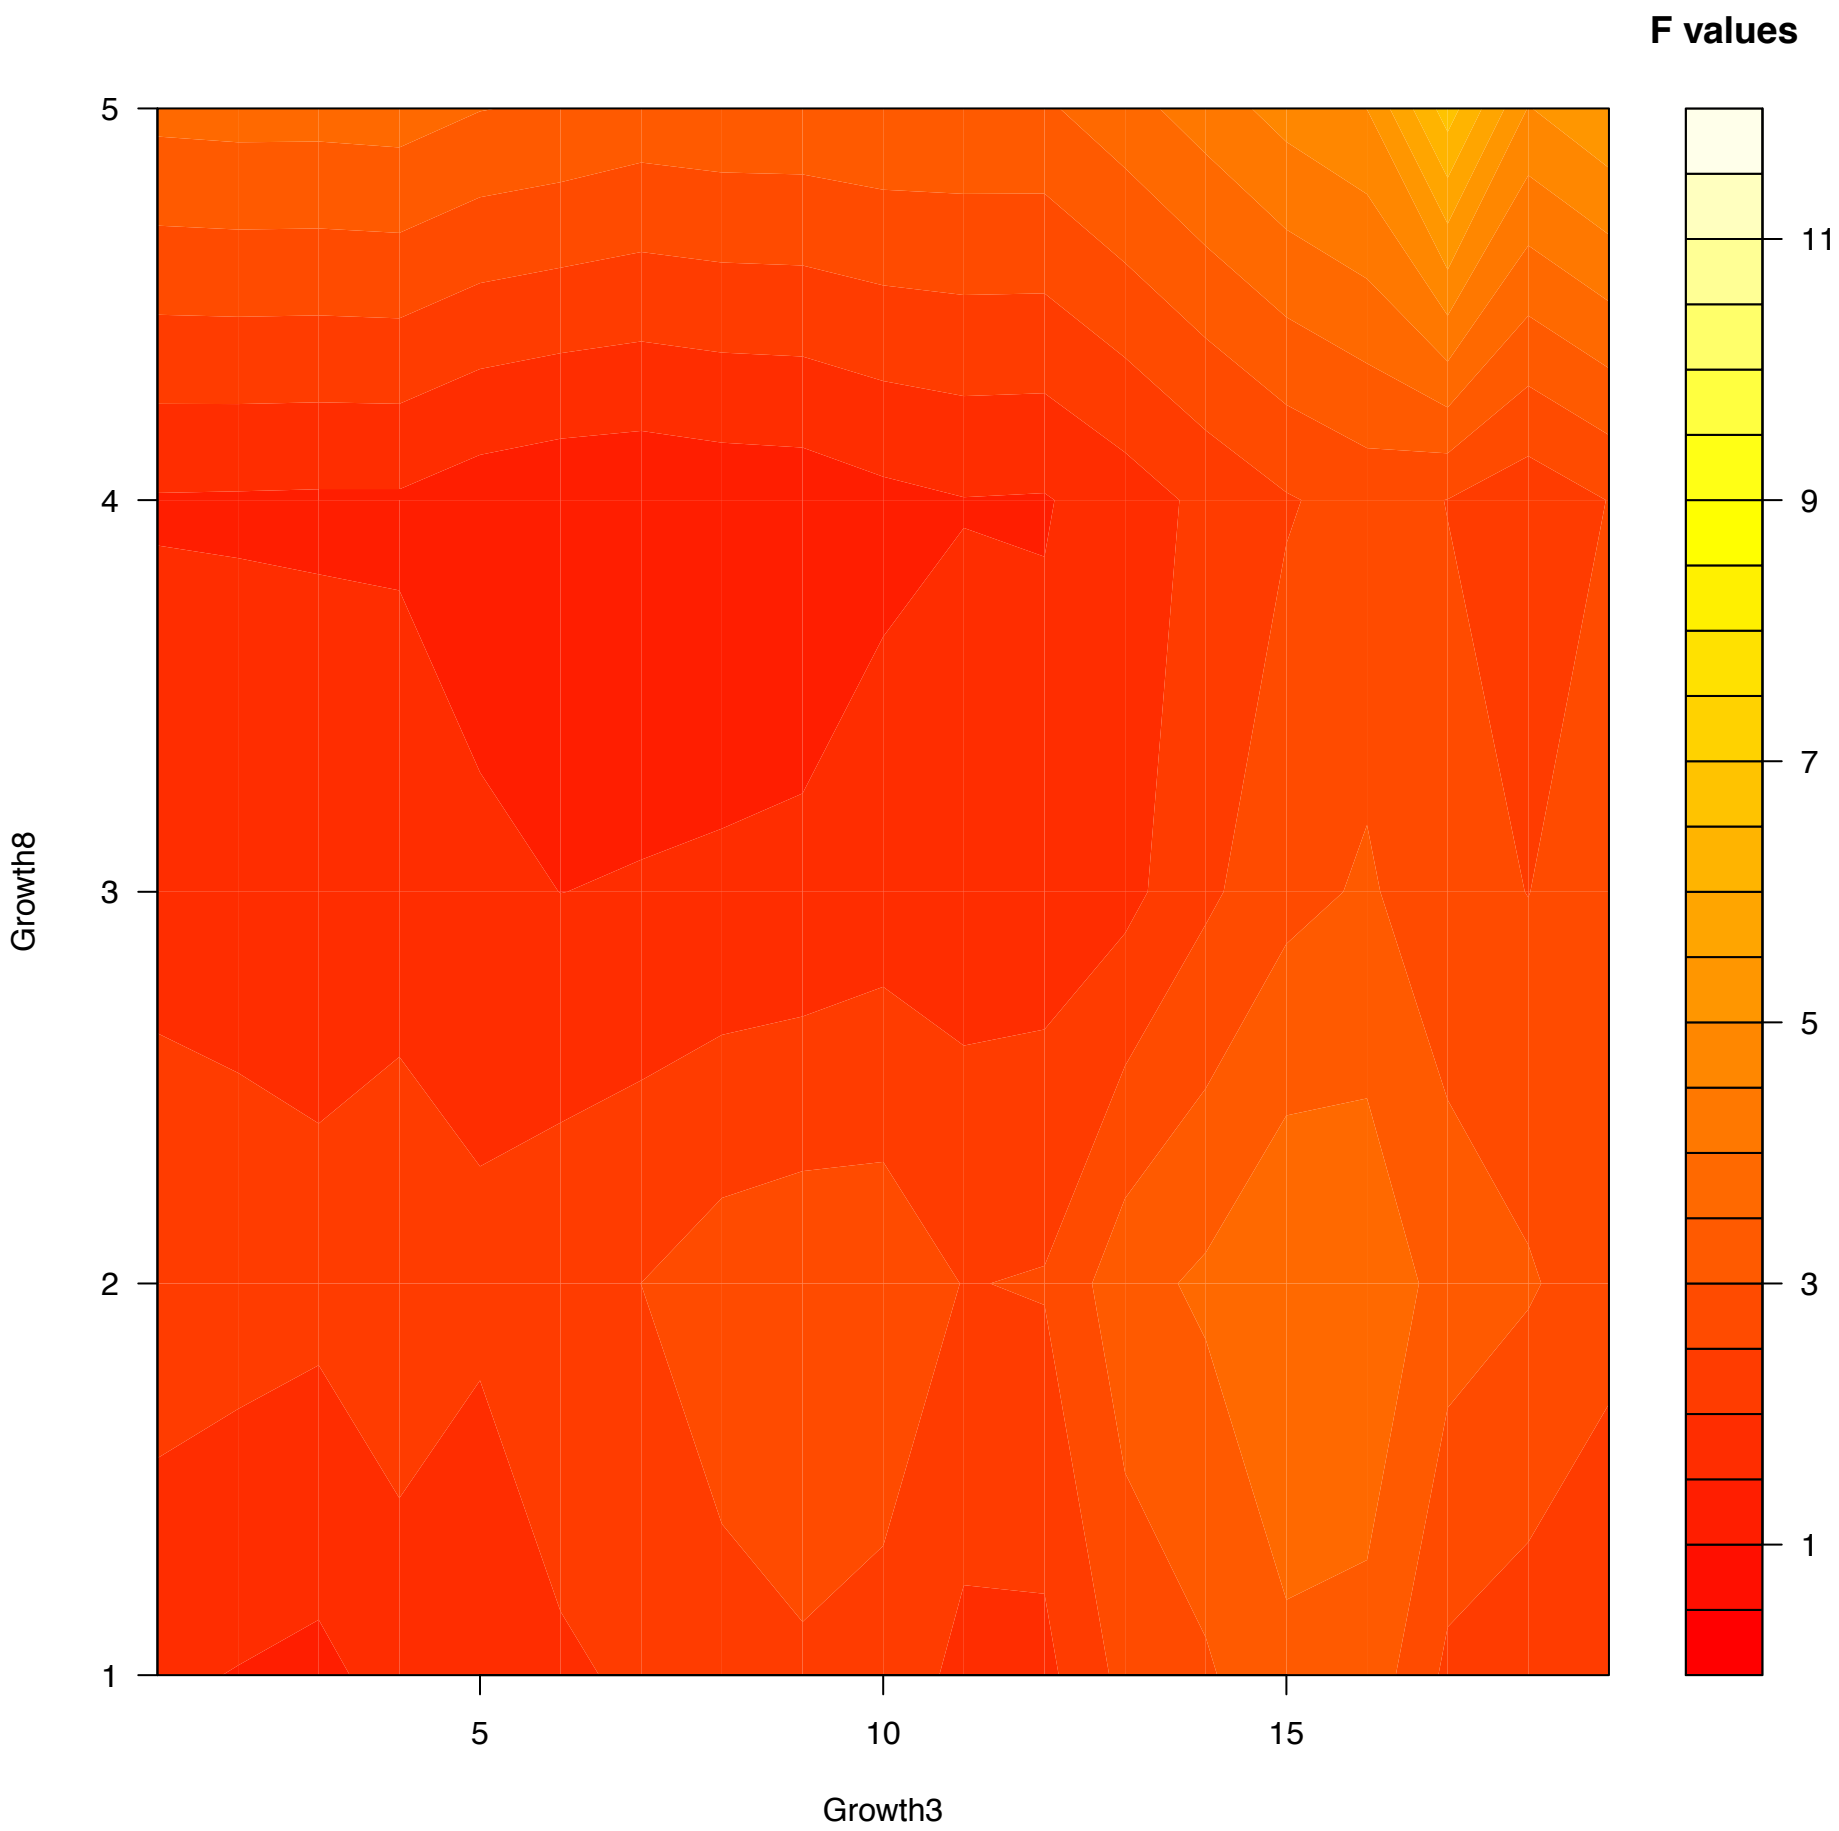

**F values**

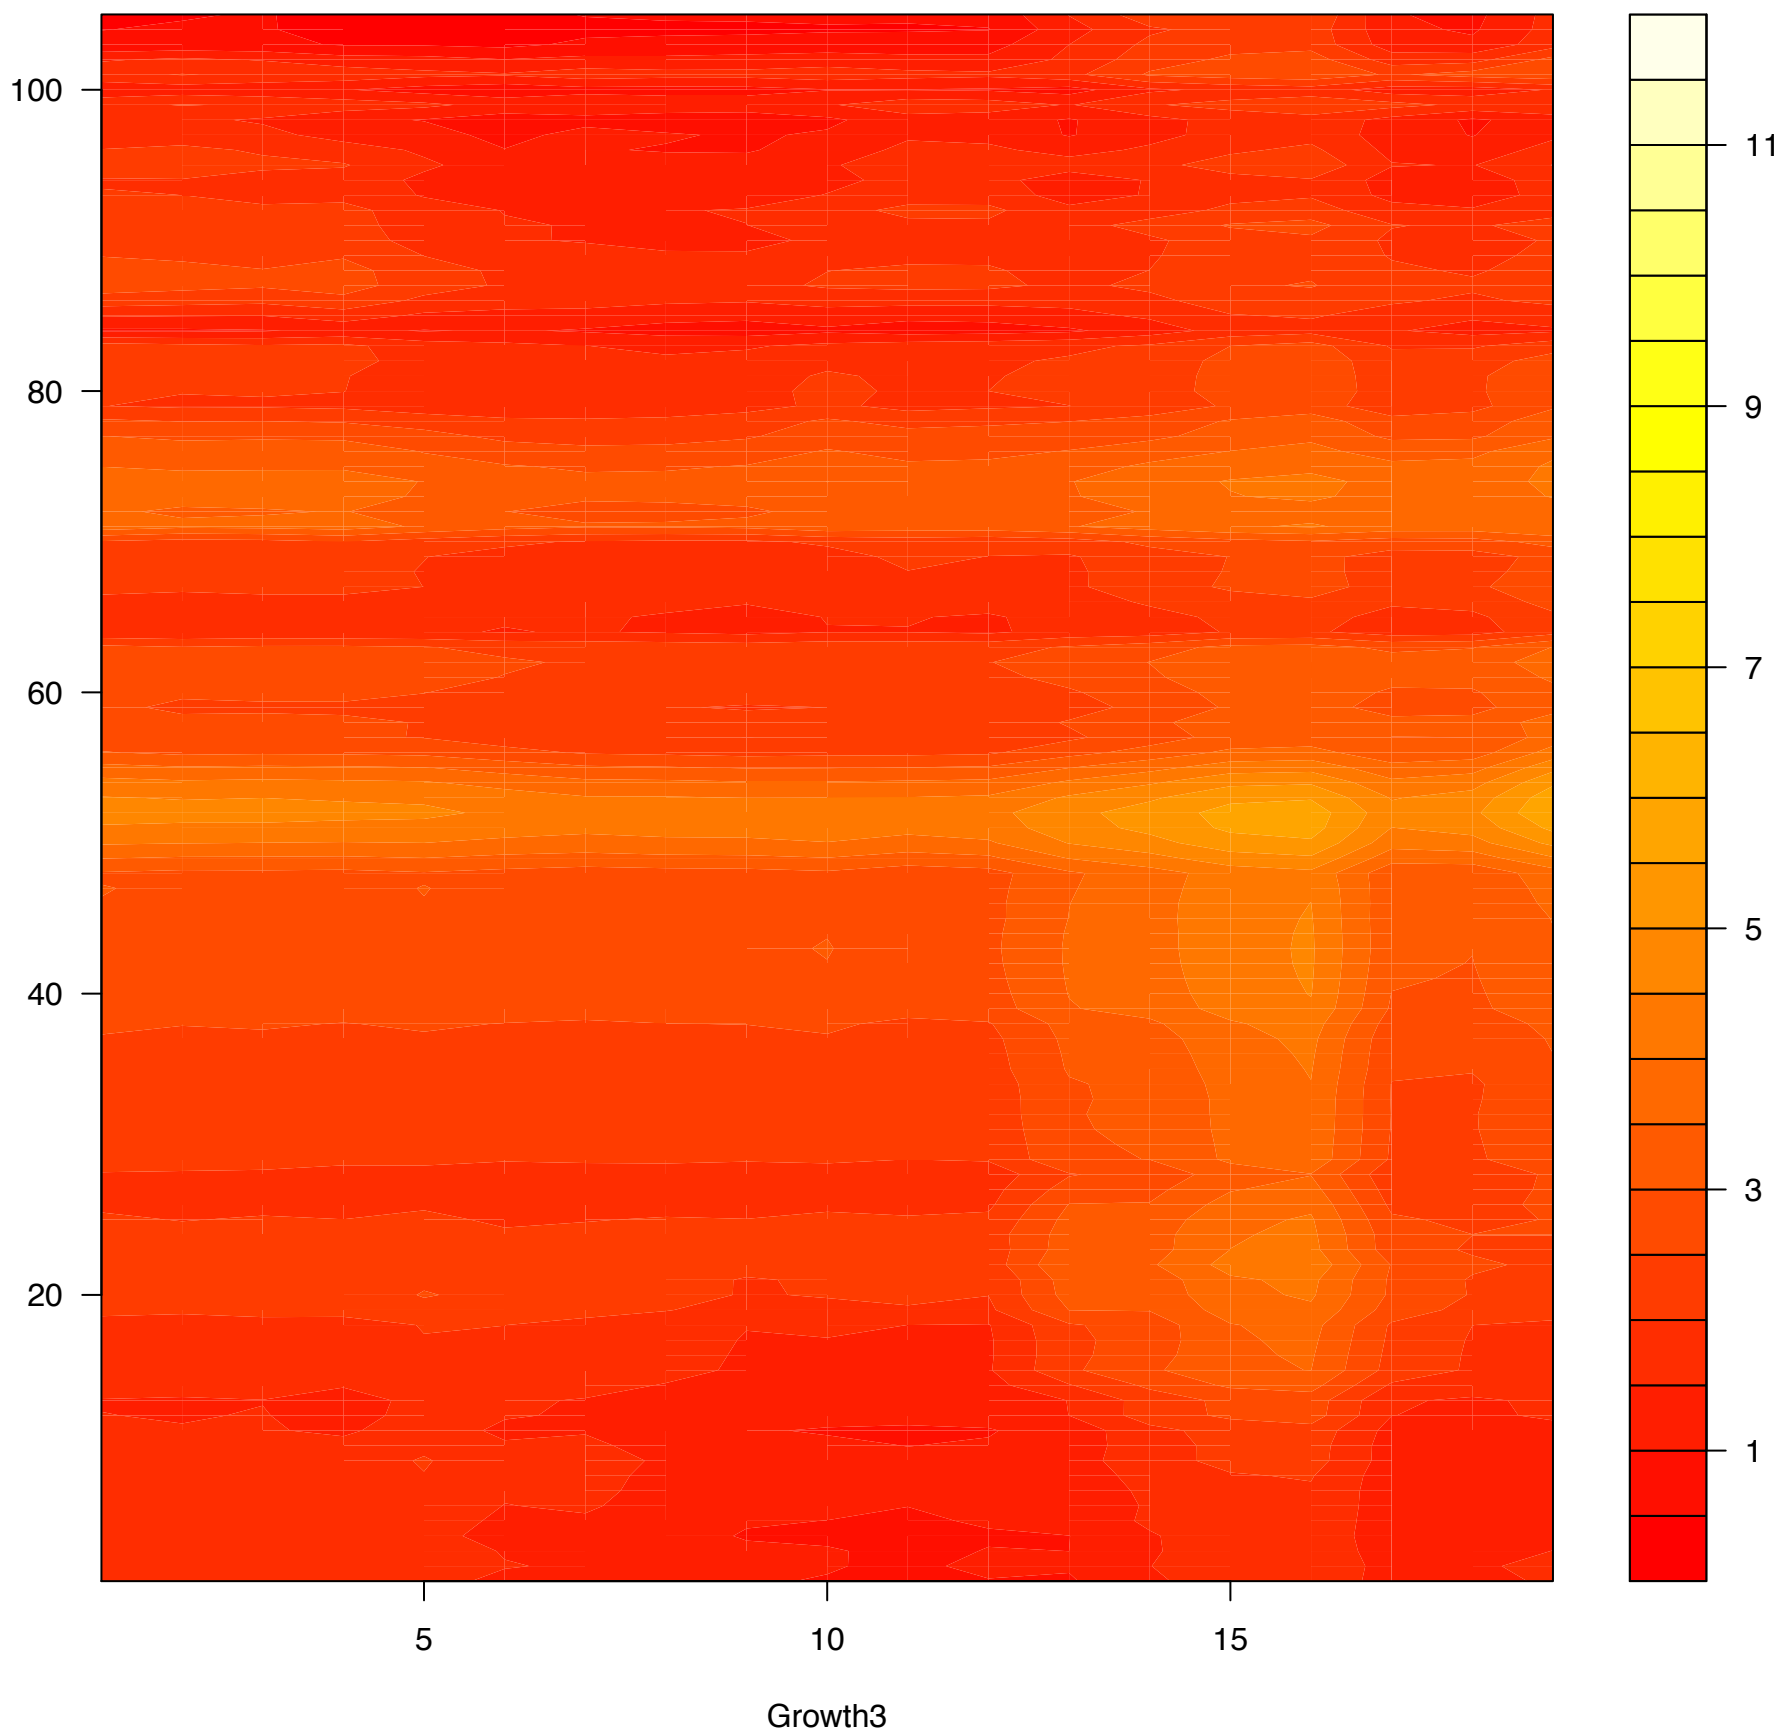

**F values**

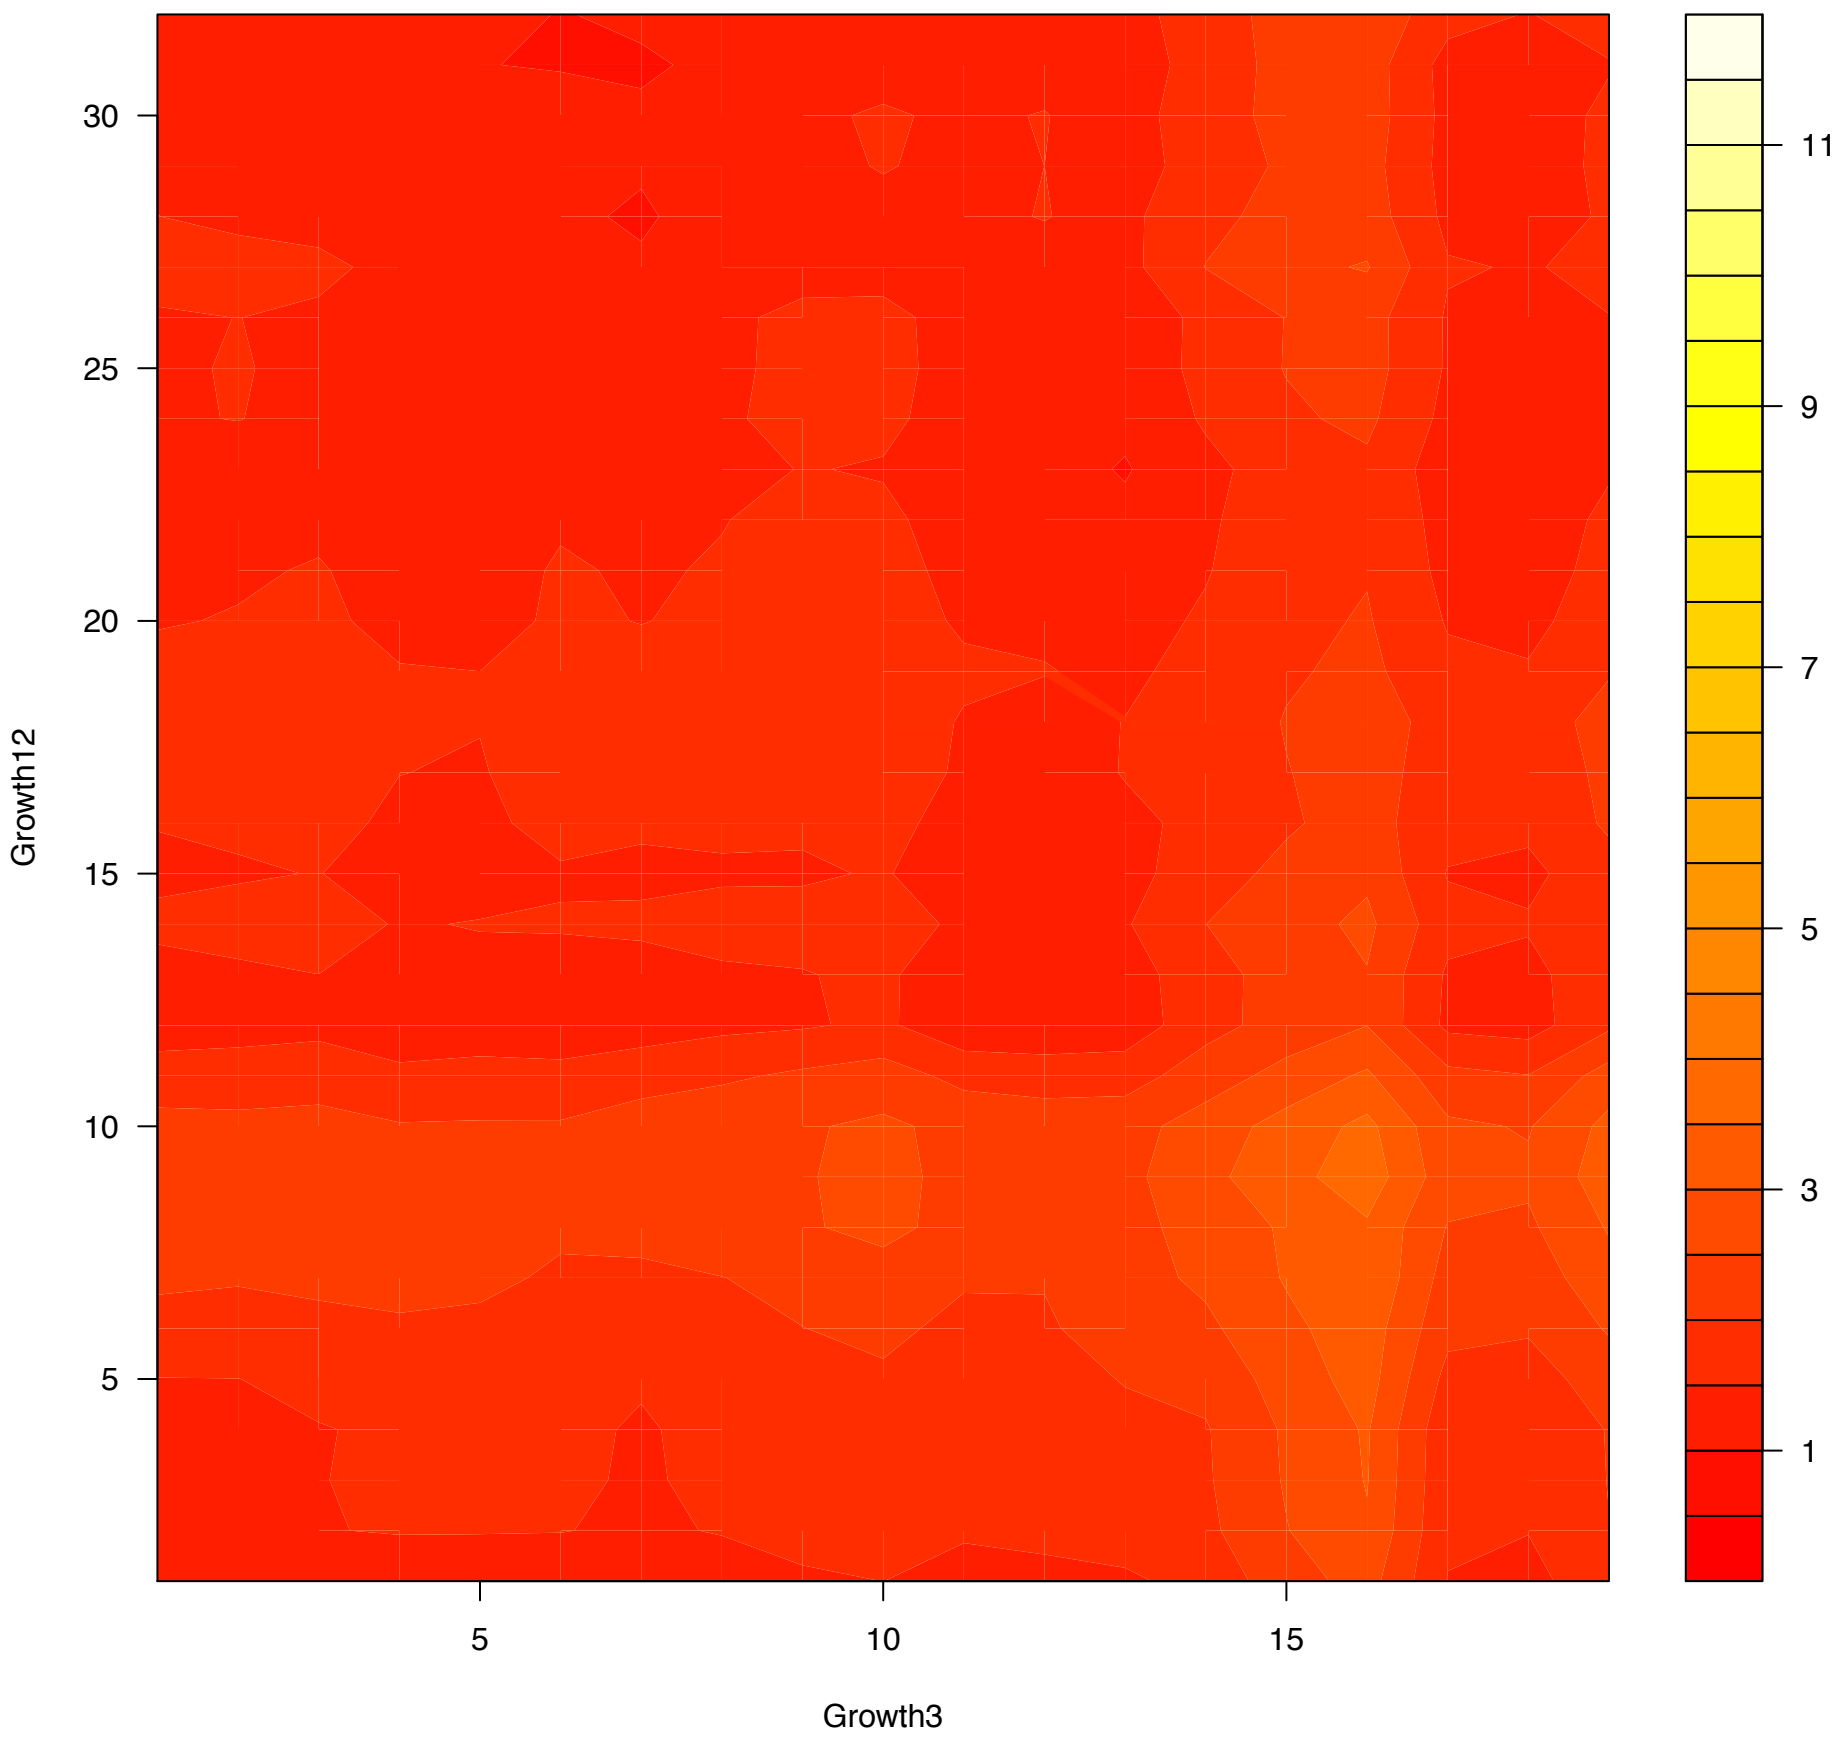

**F values**

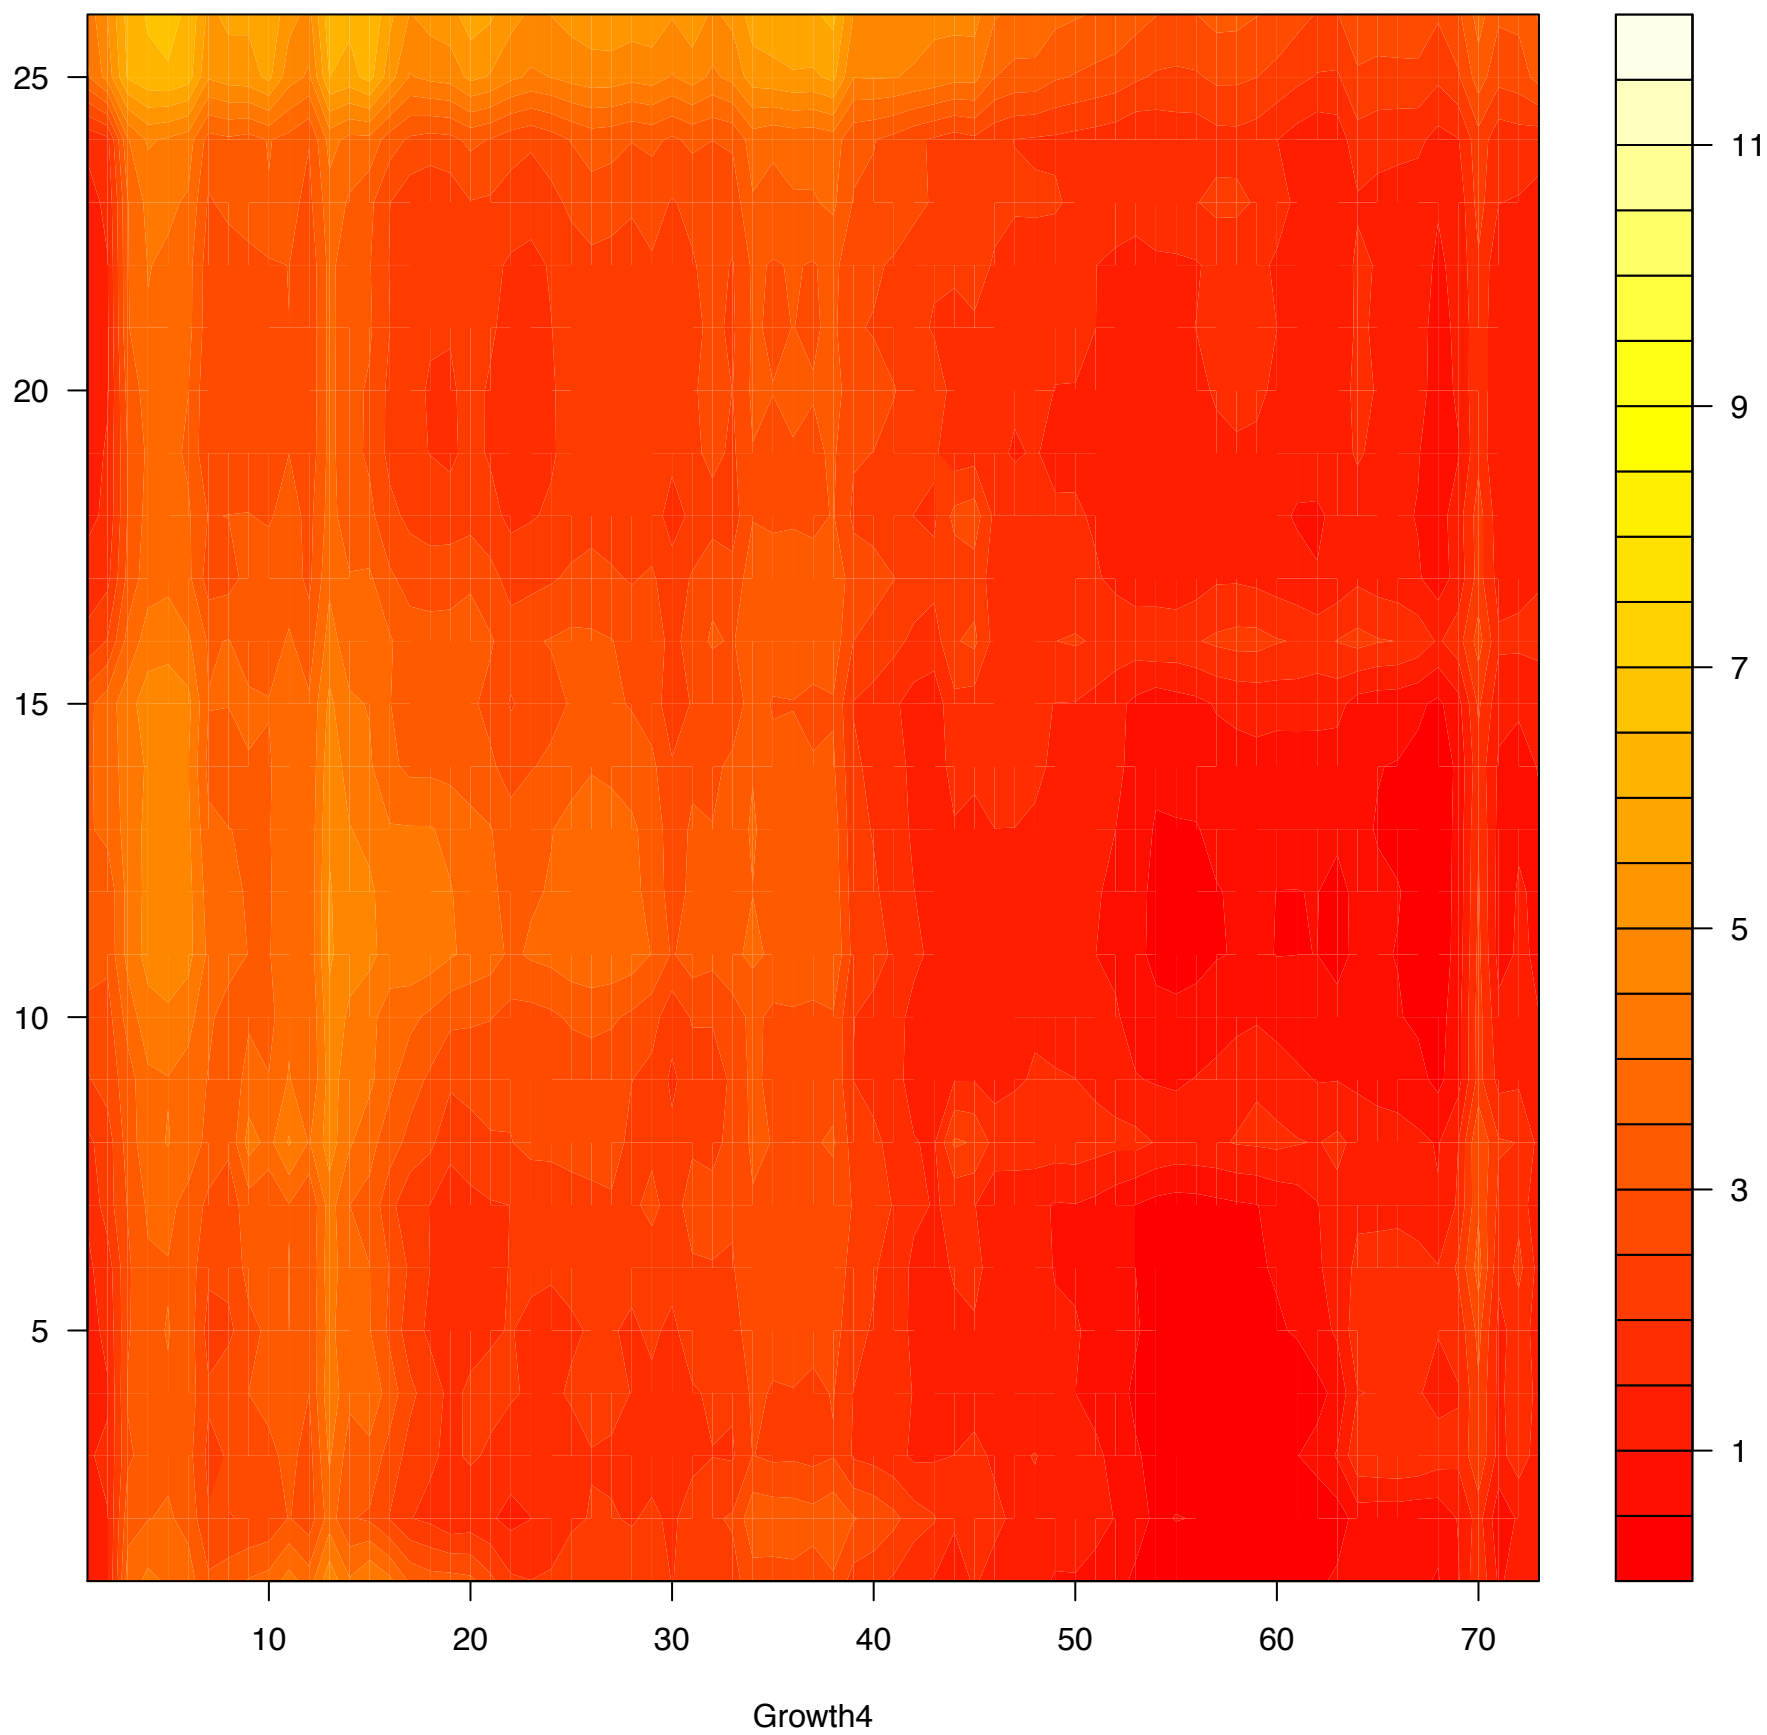

**F values**

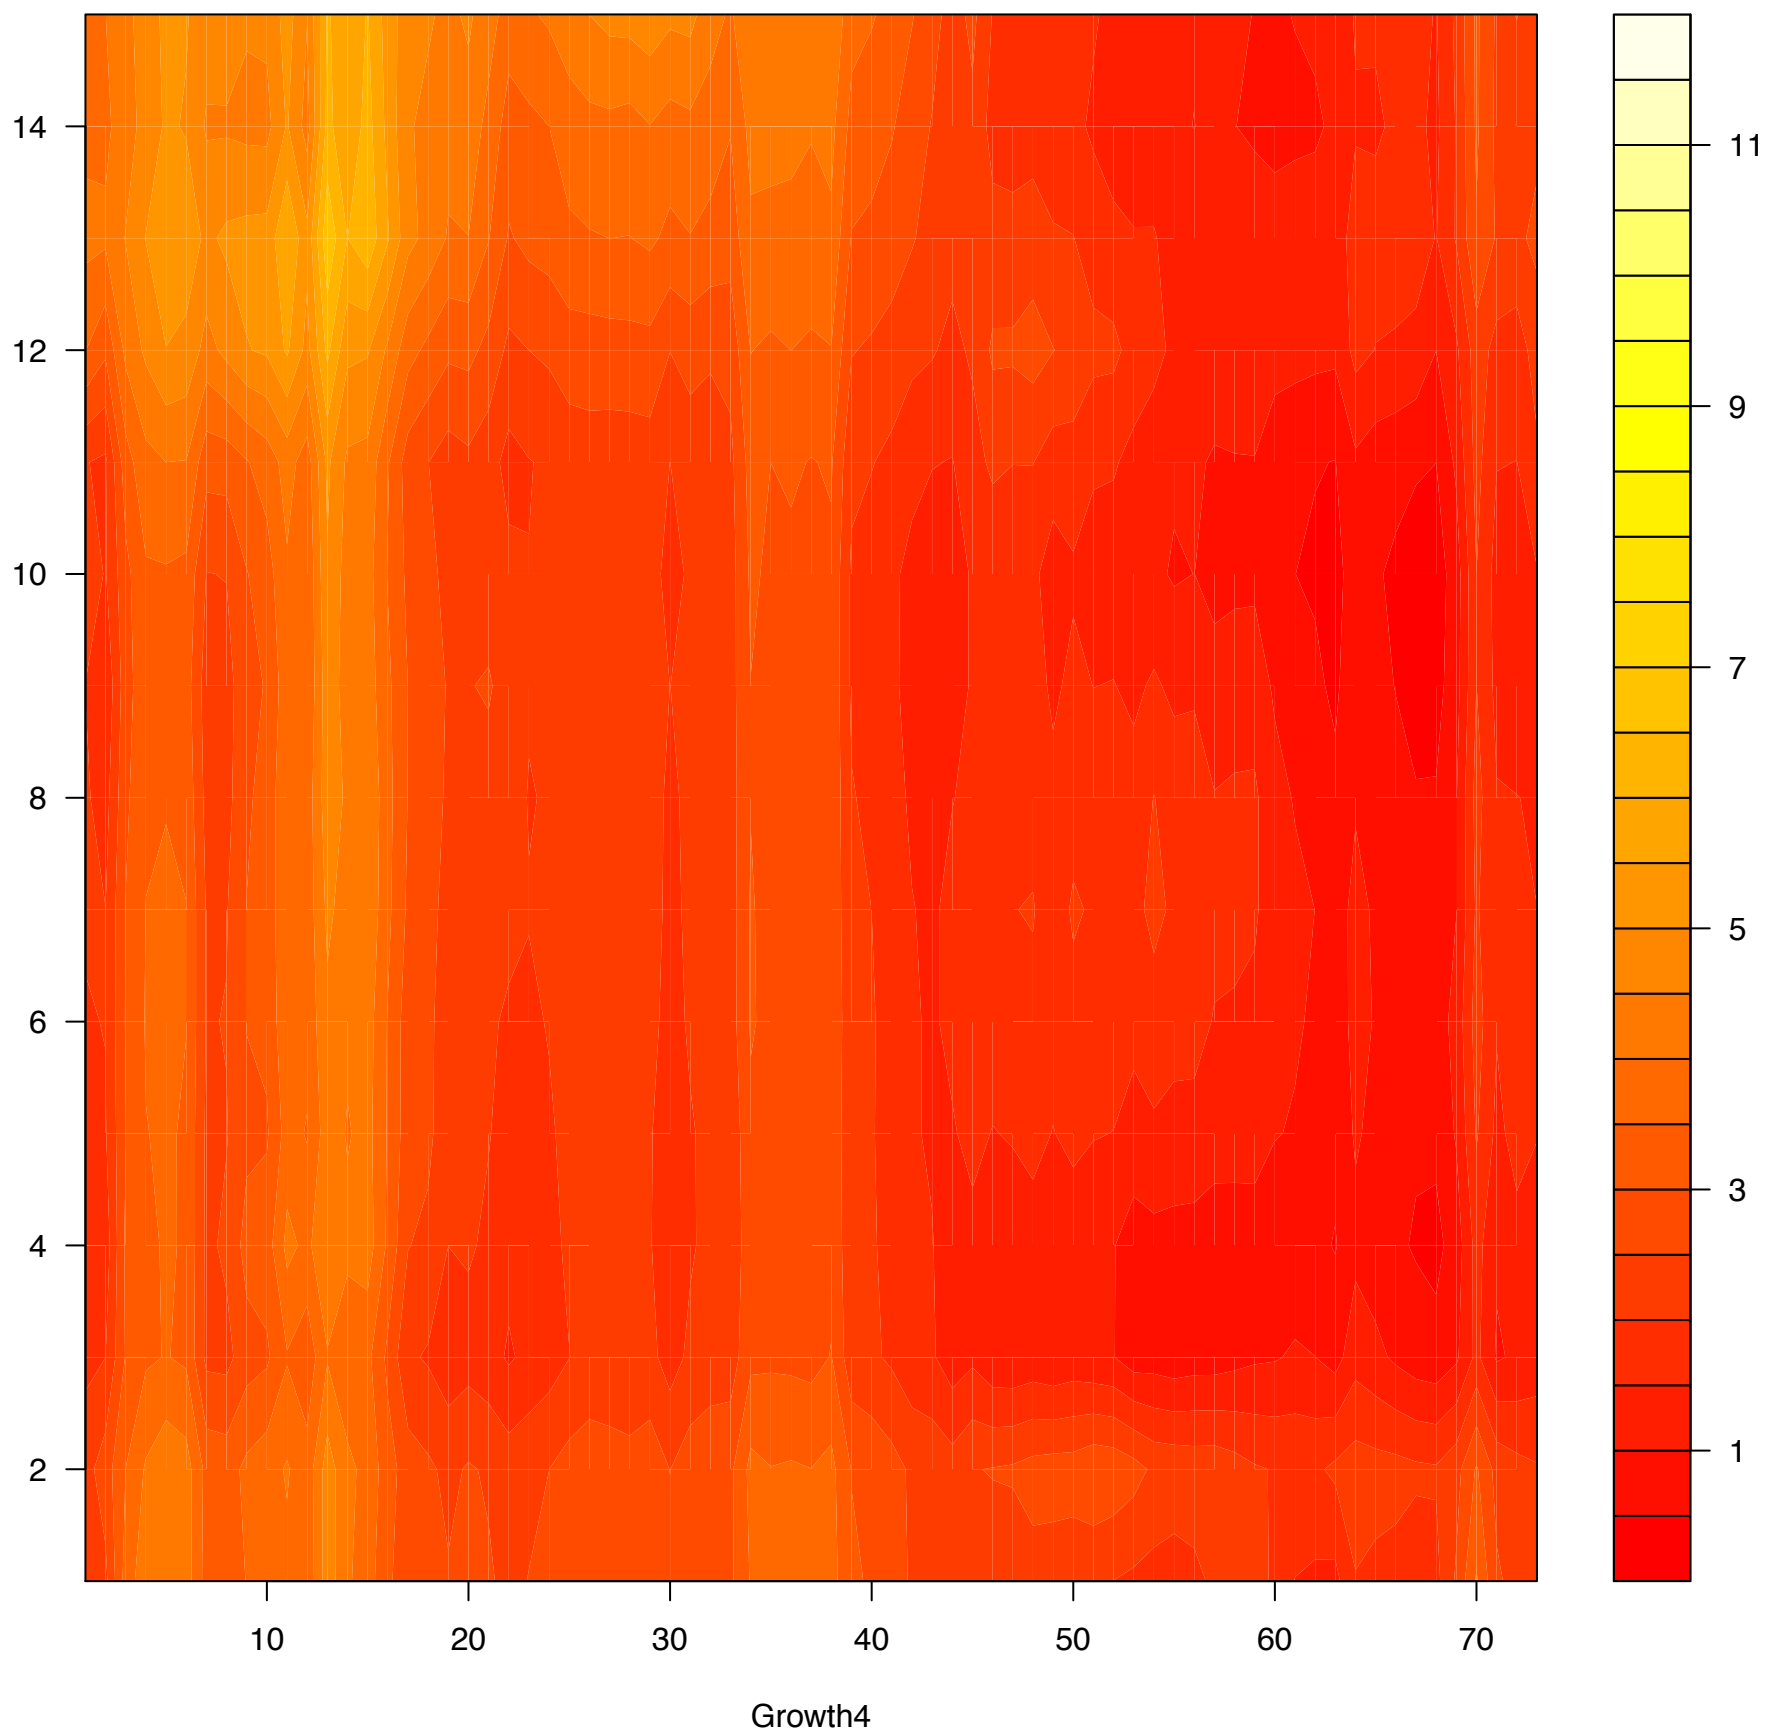

F values

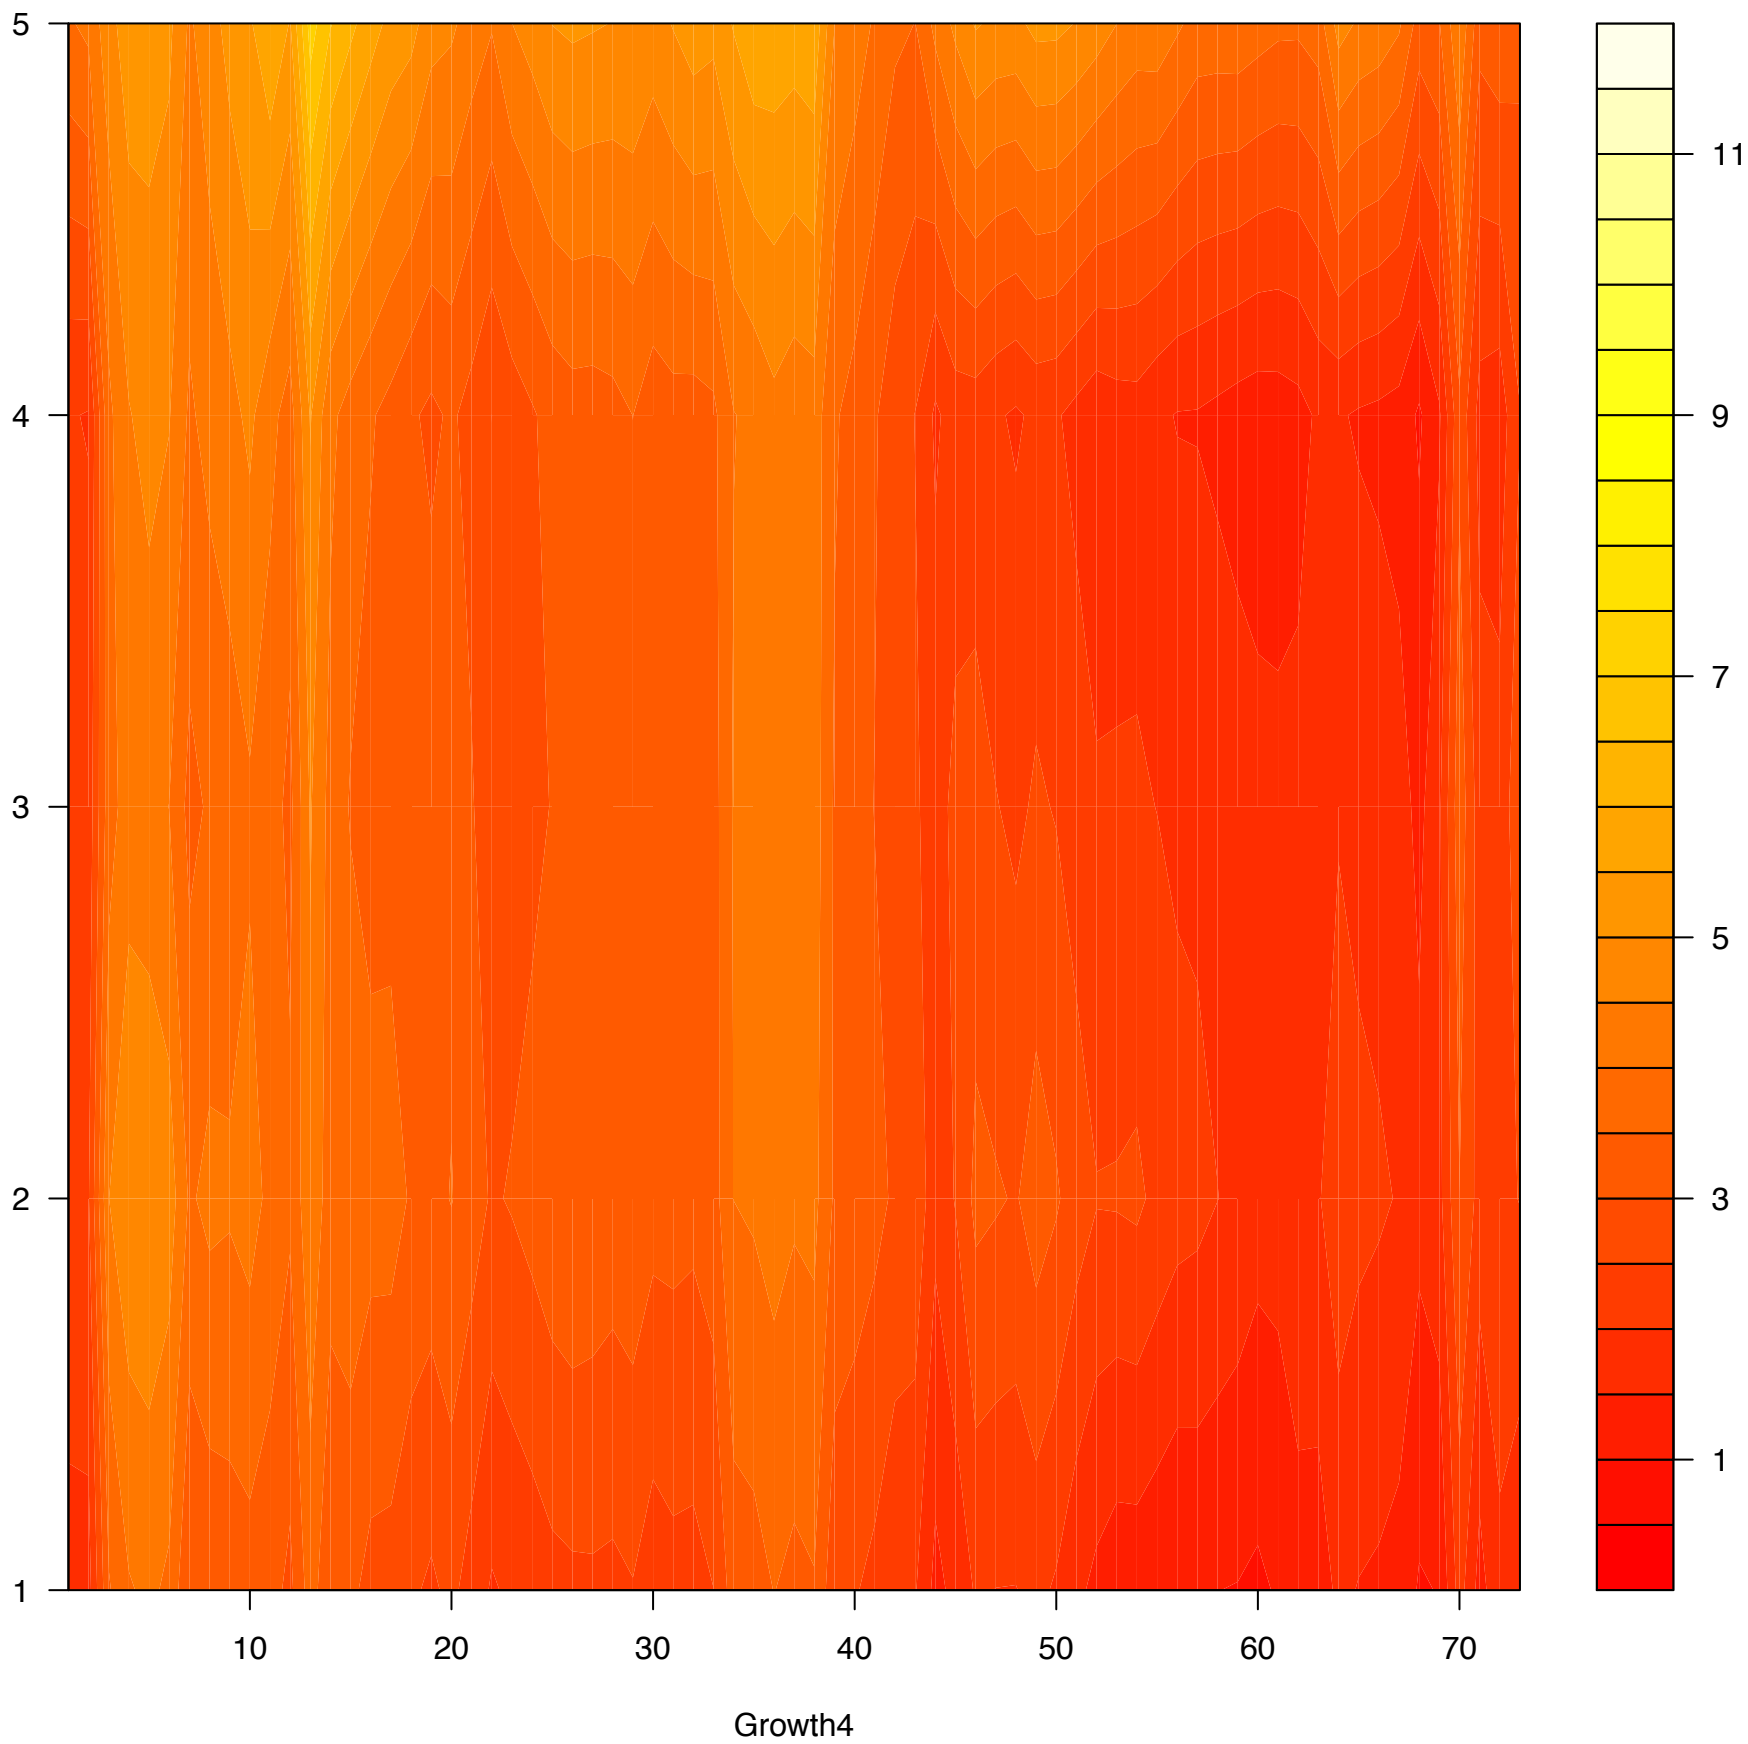



**F values**

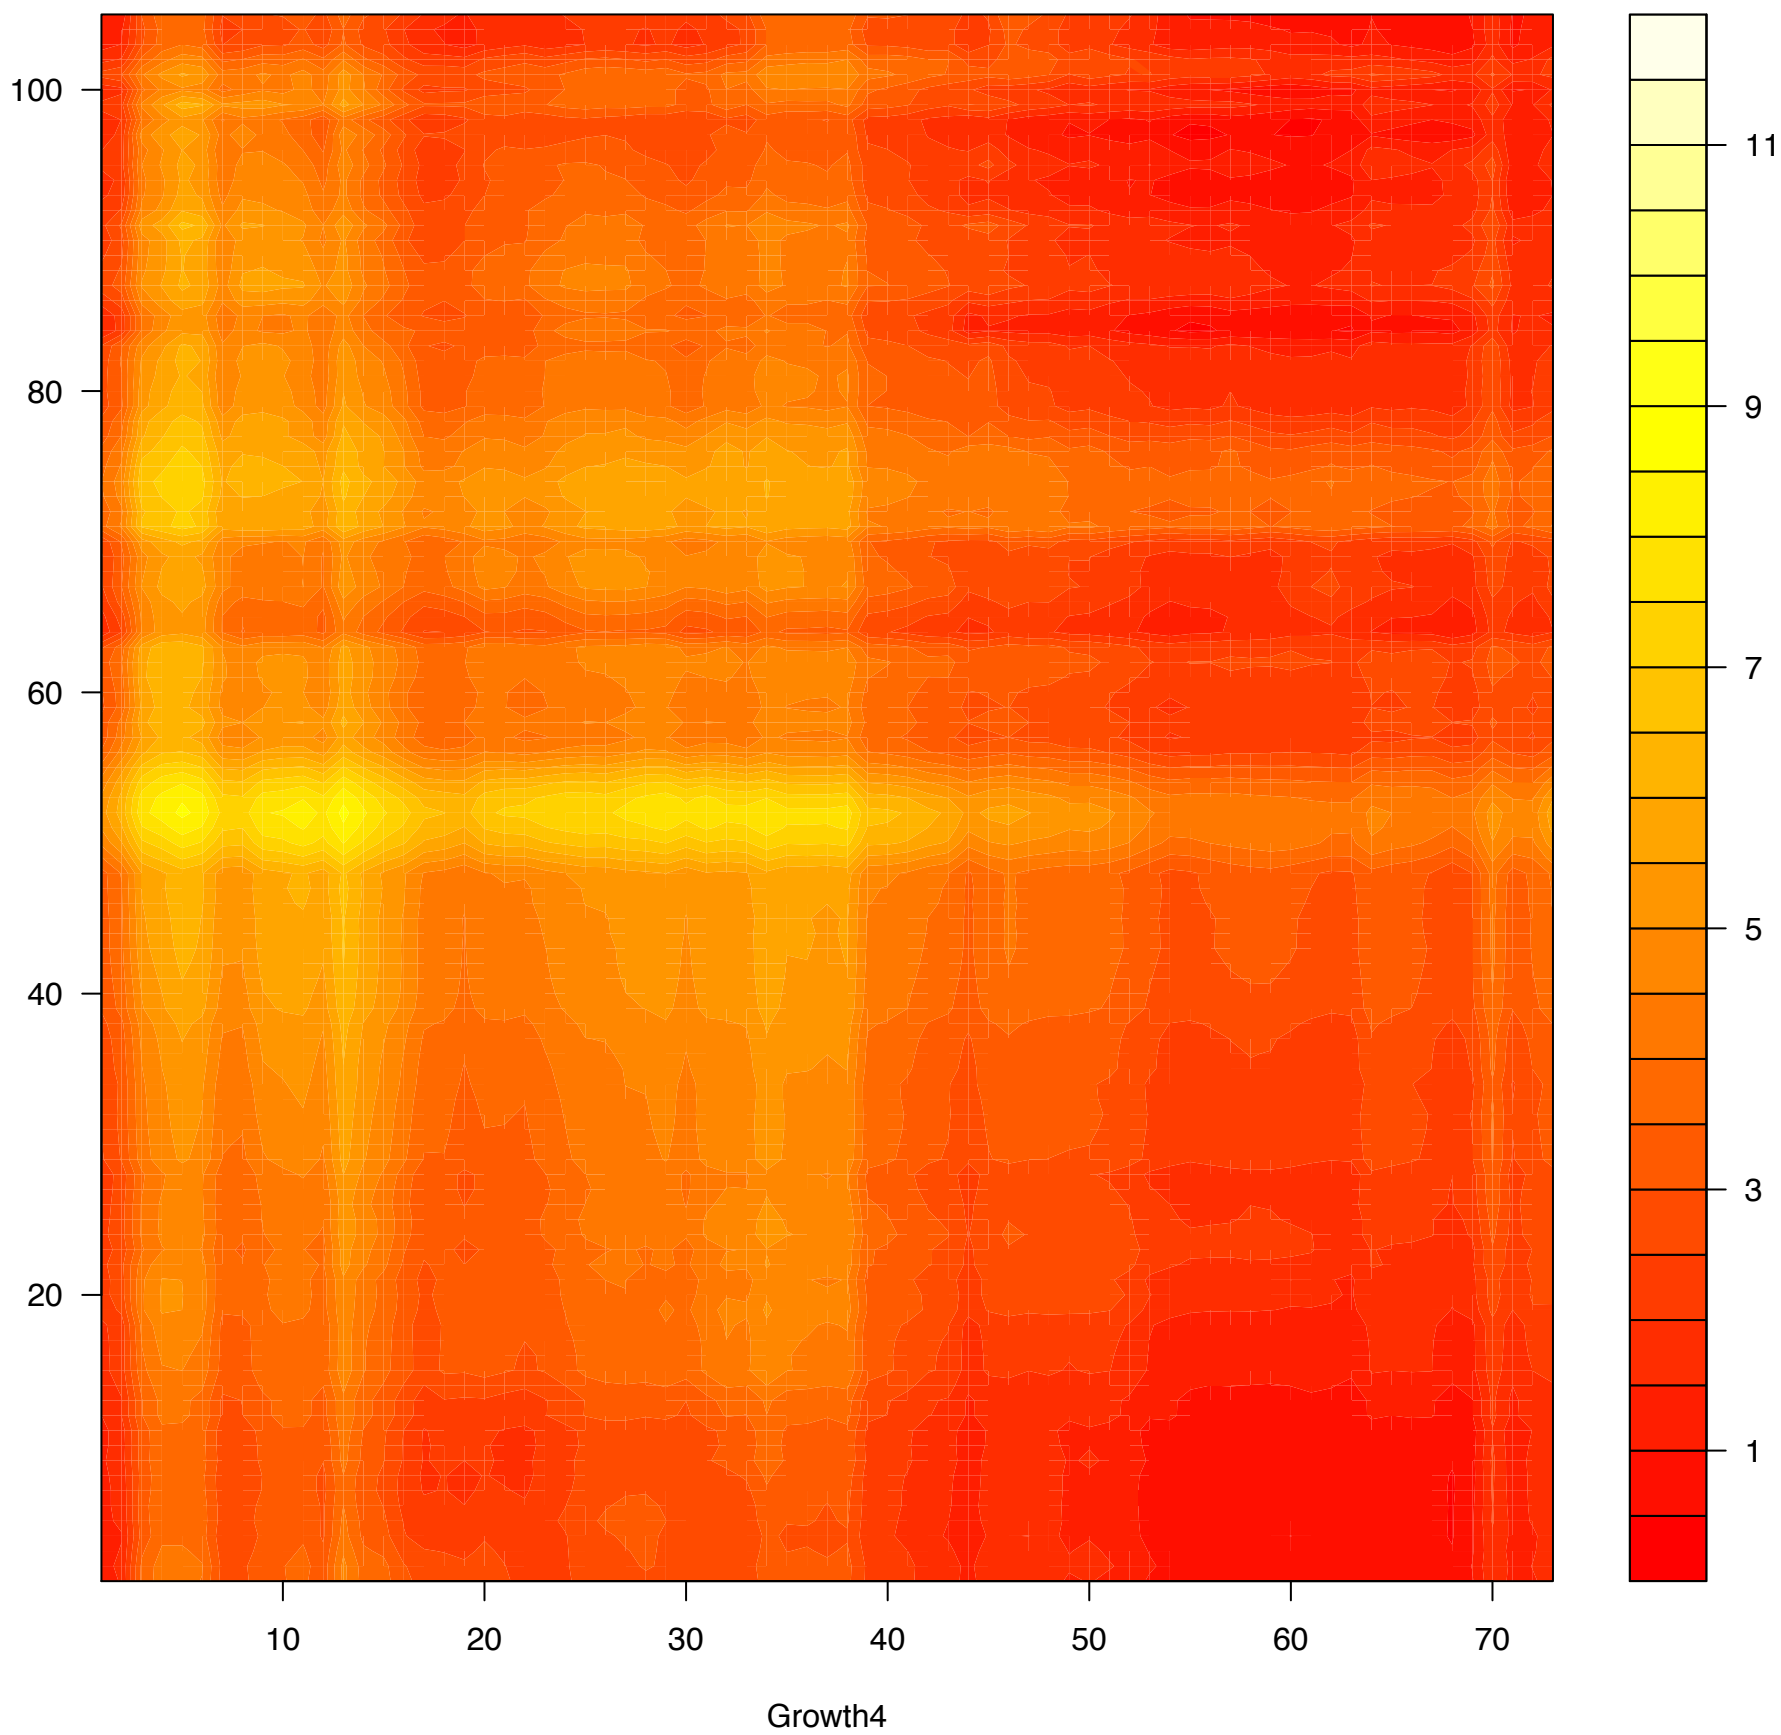

F values

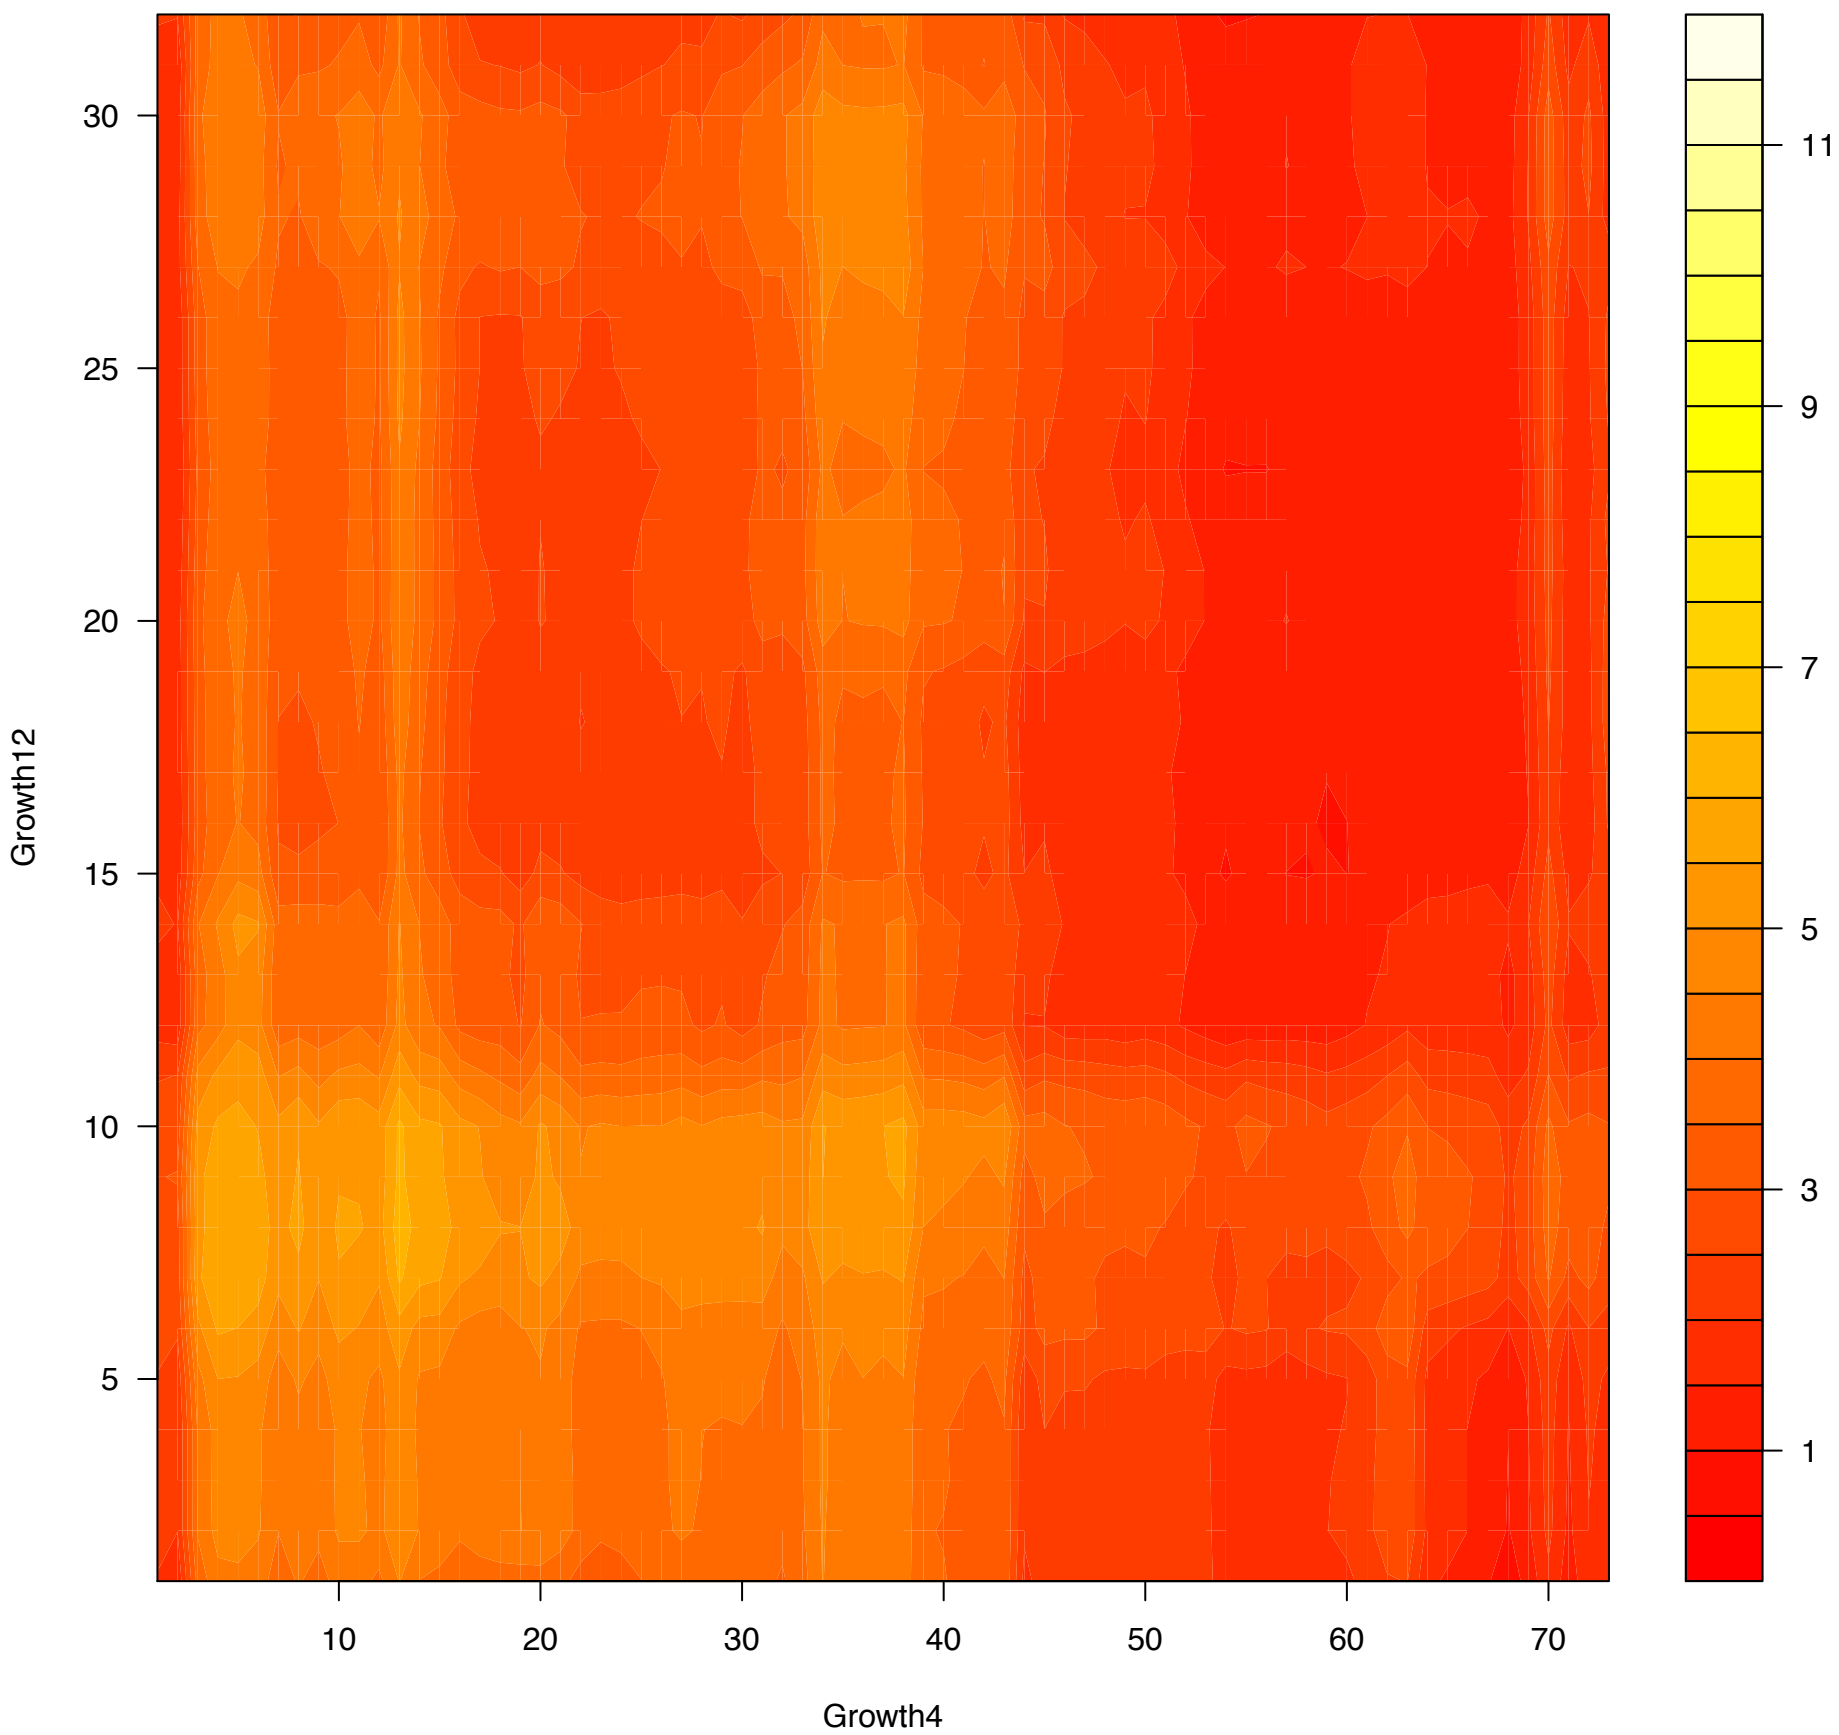

F values

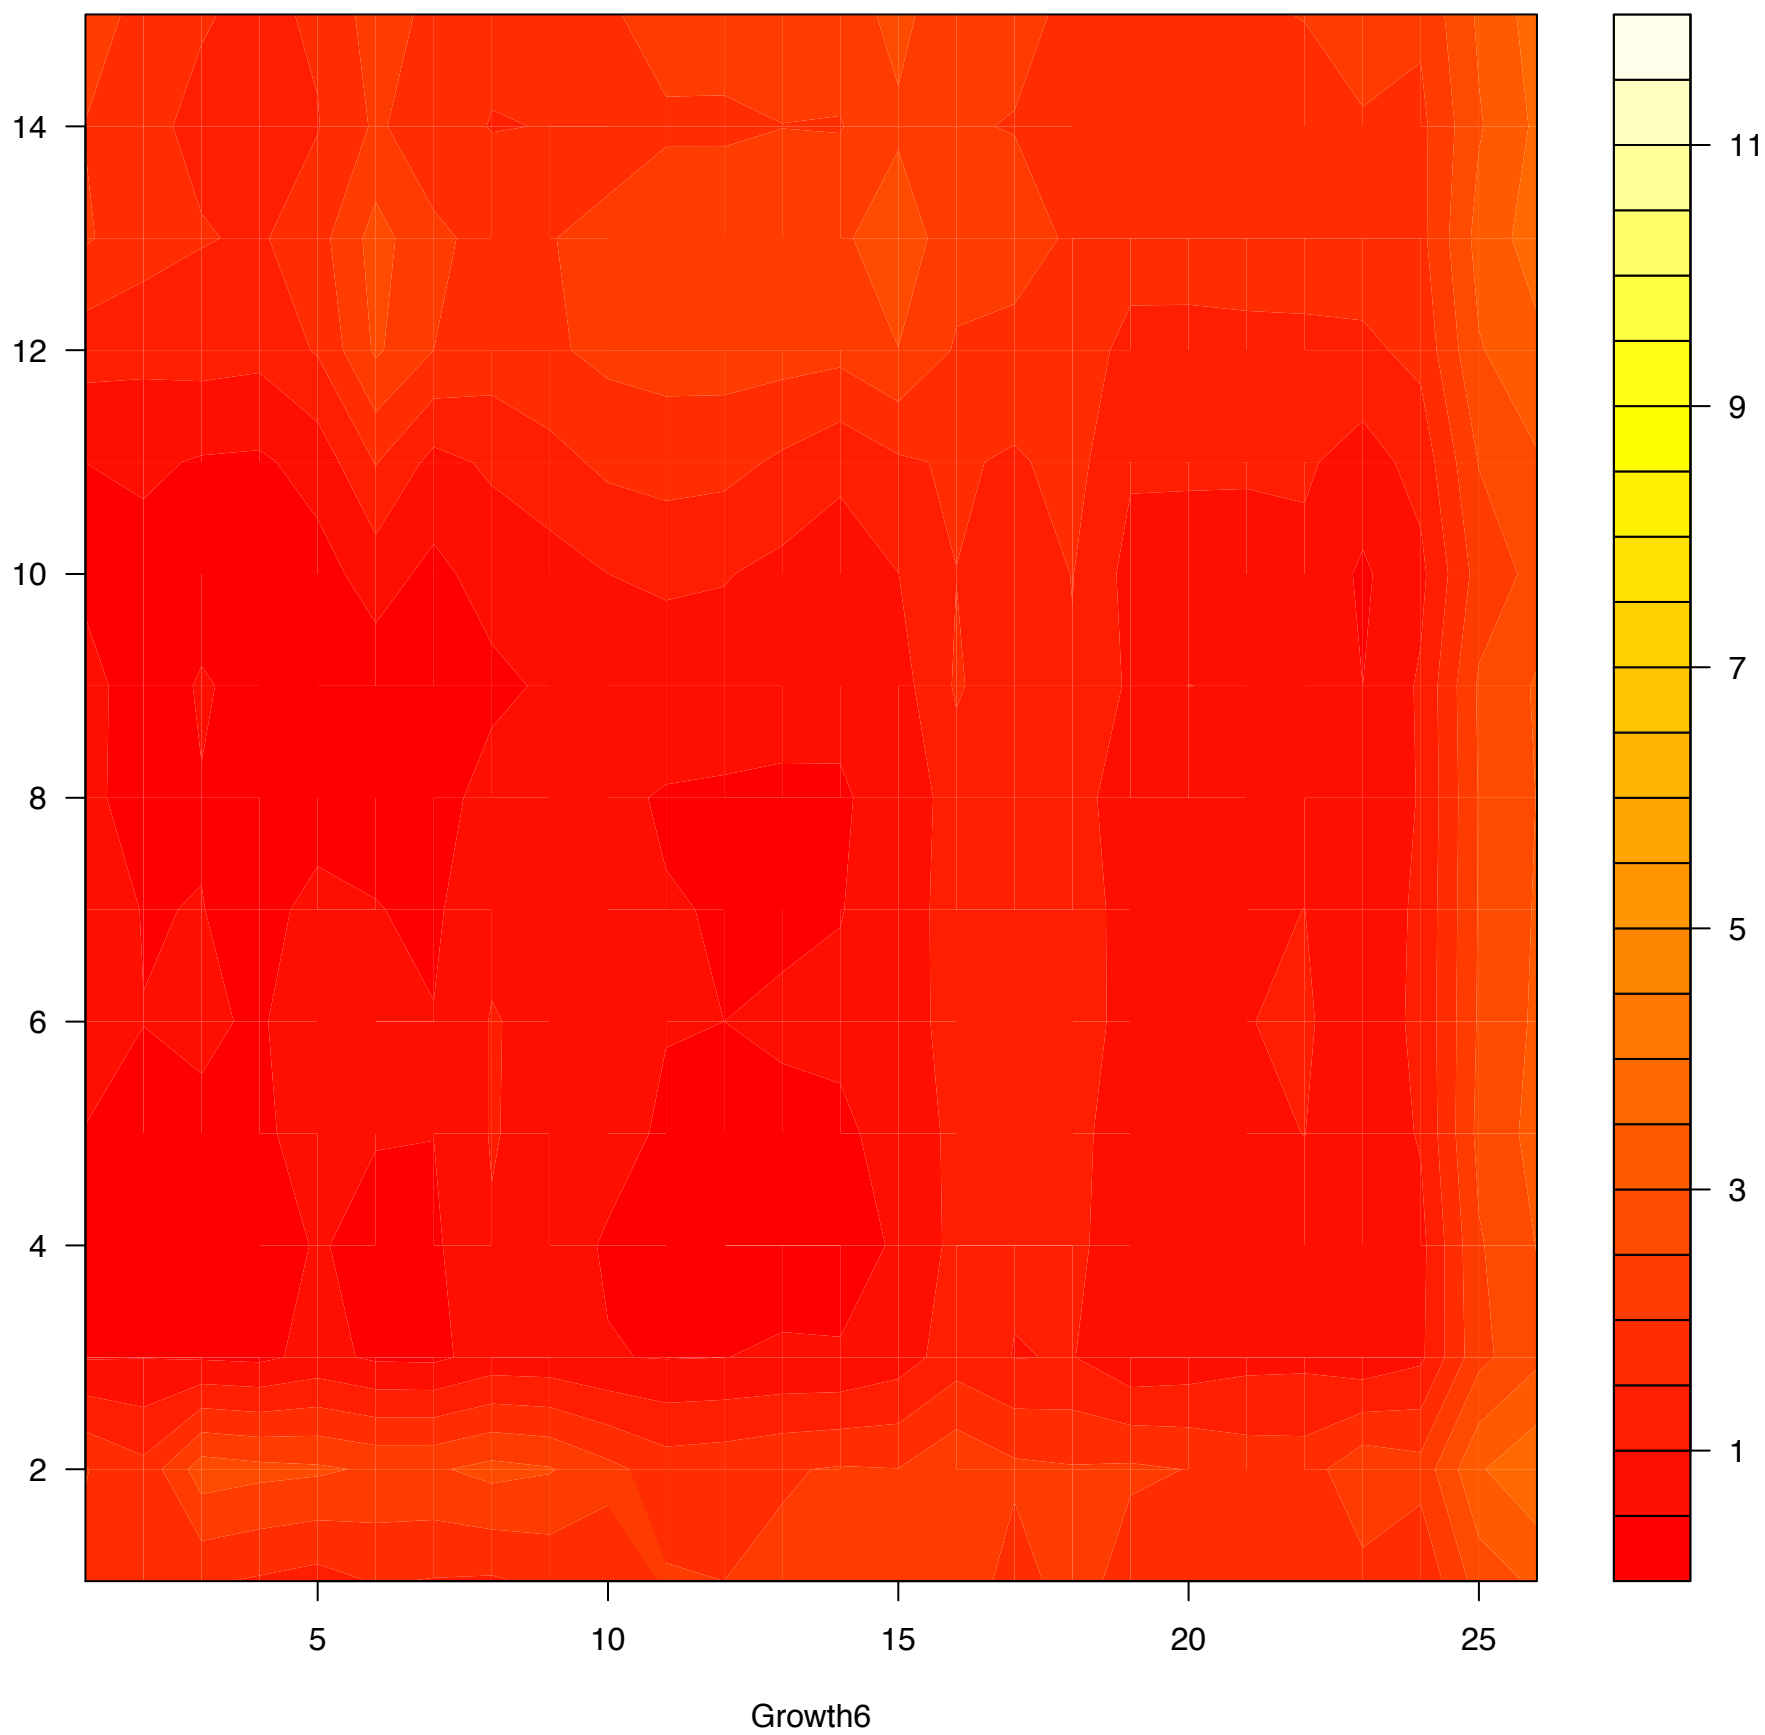

F values

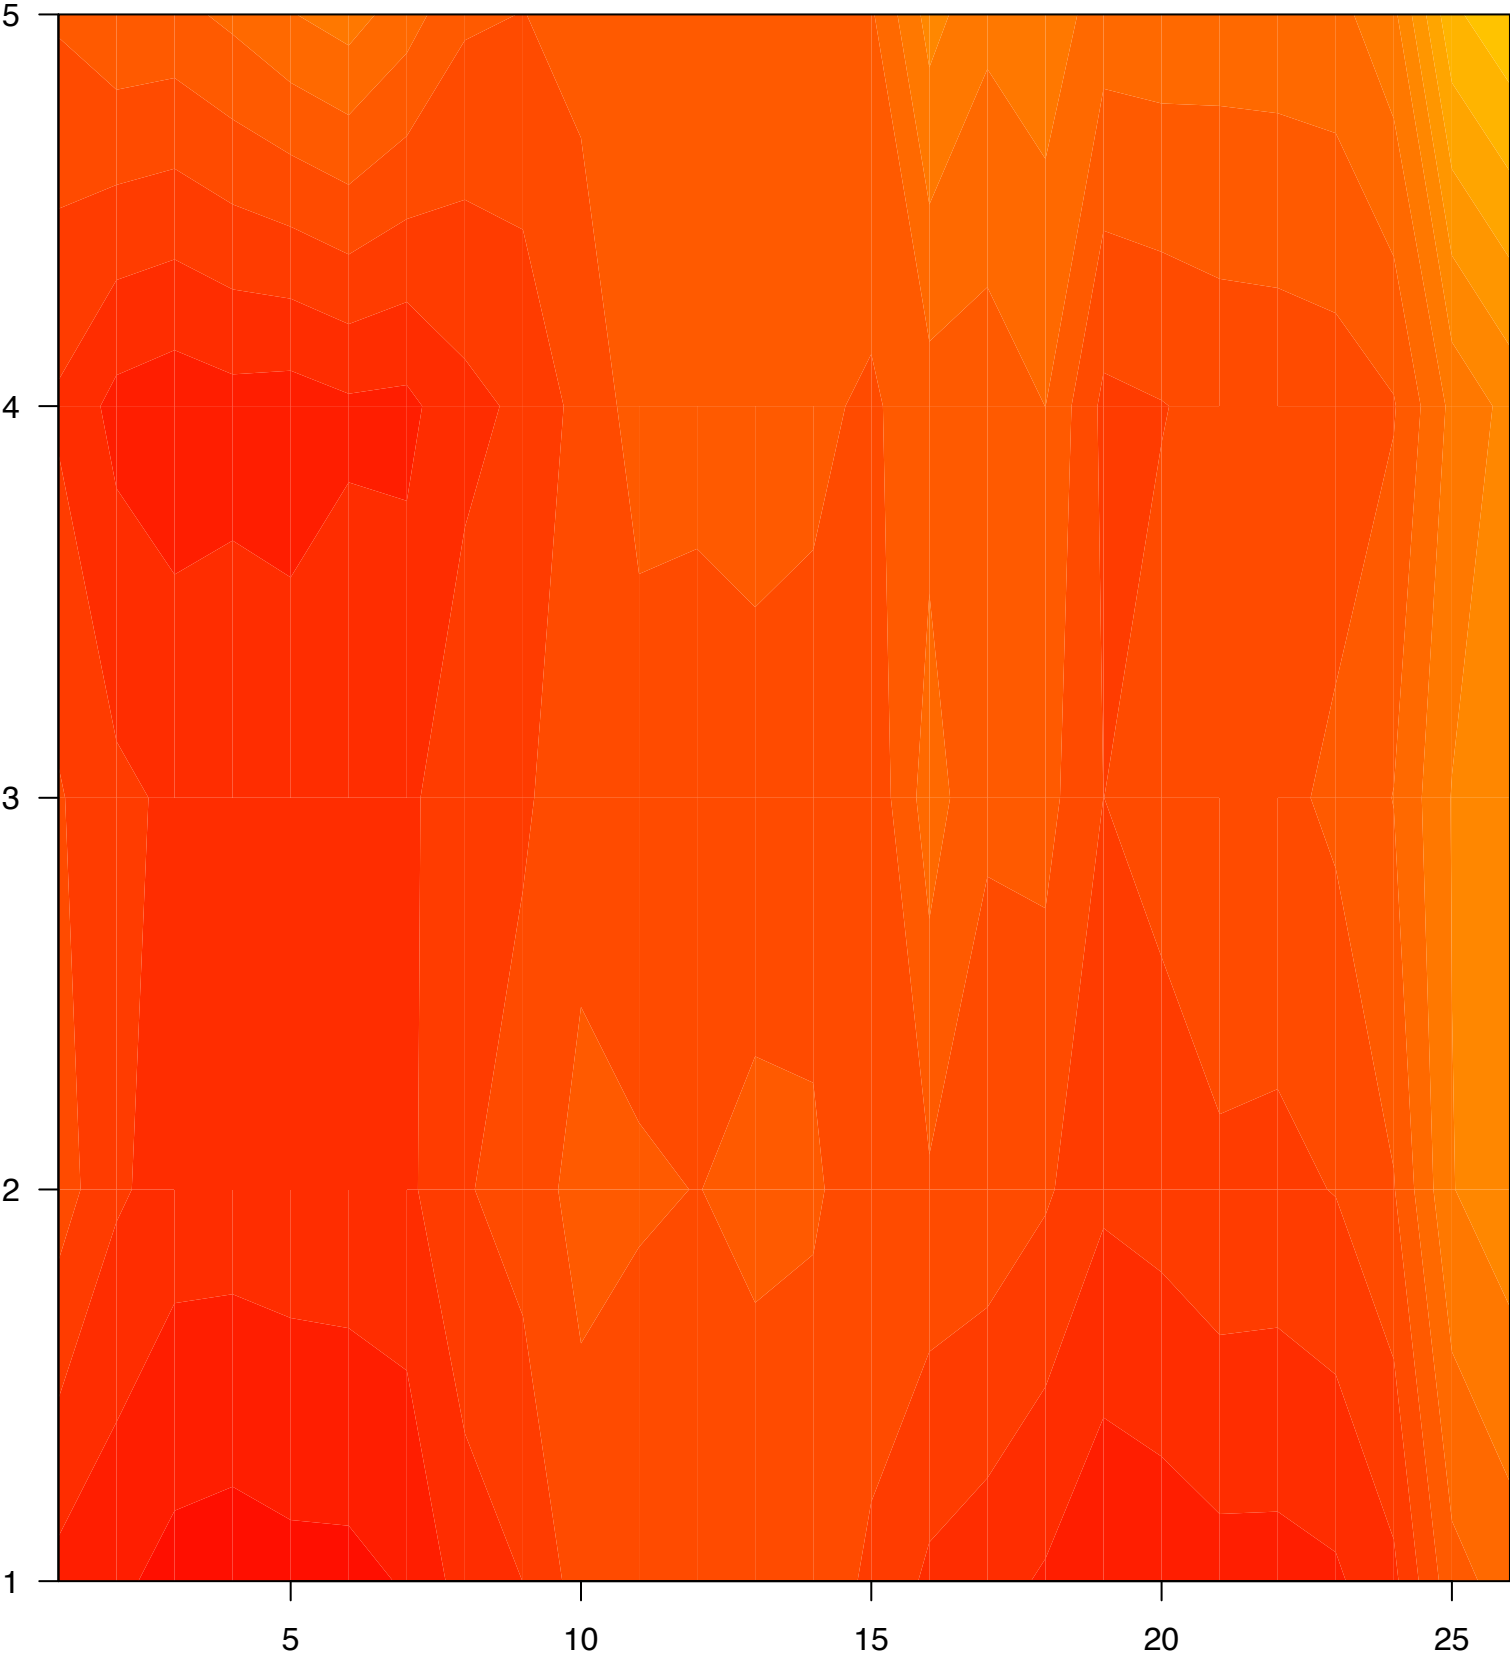

11

9

7

5

3

1

5

4

3

2

1

5

10

15

20

25

Growth6

Growth8

**F values**

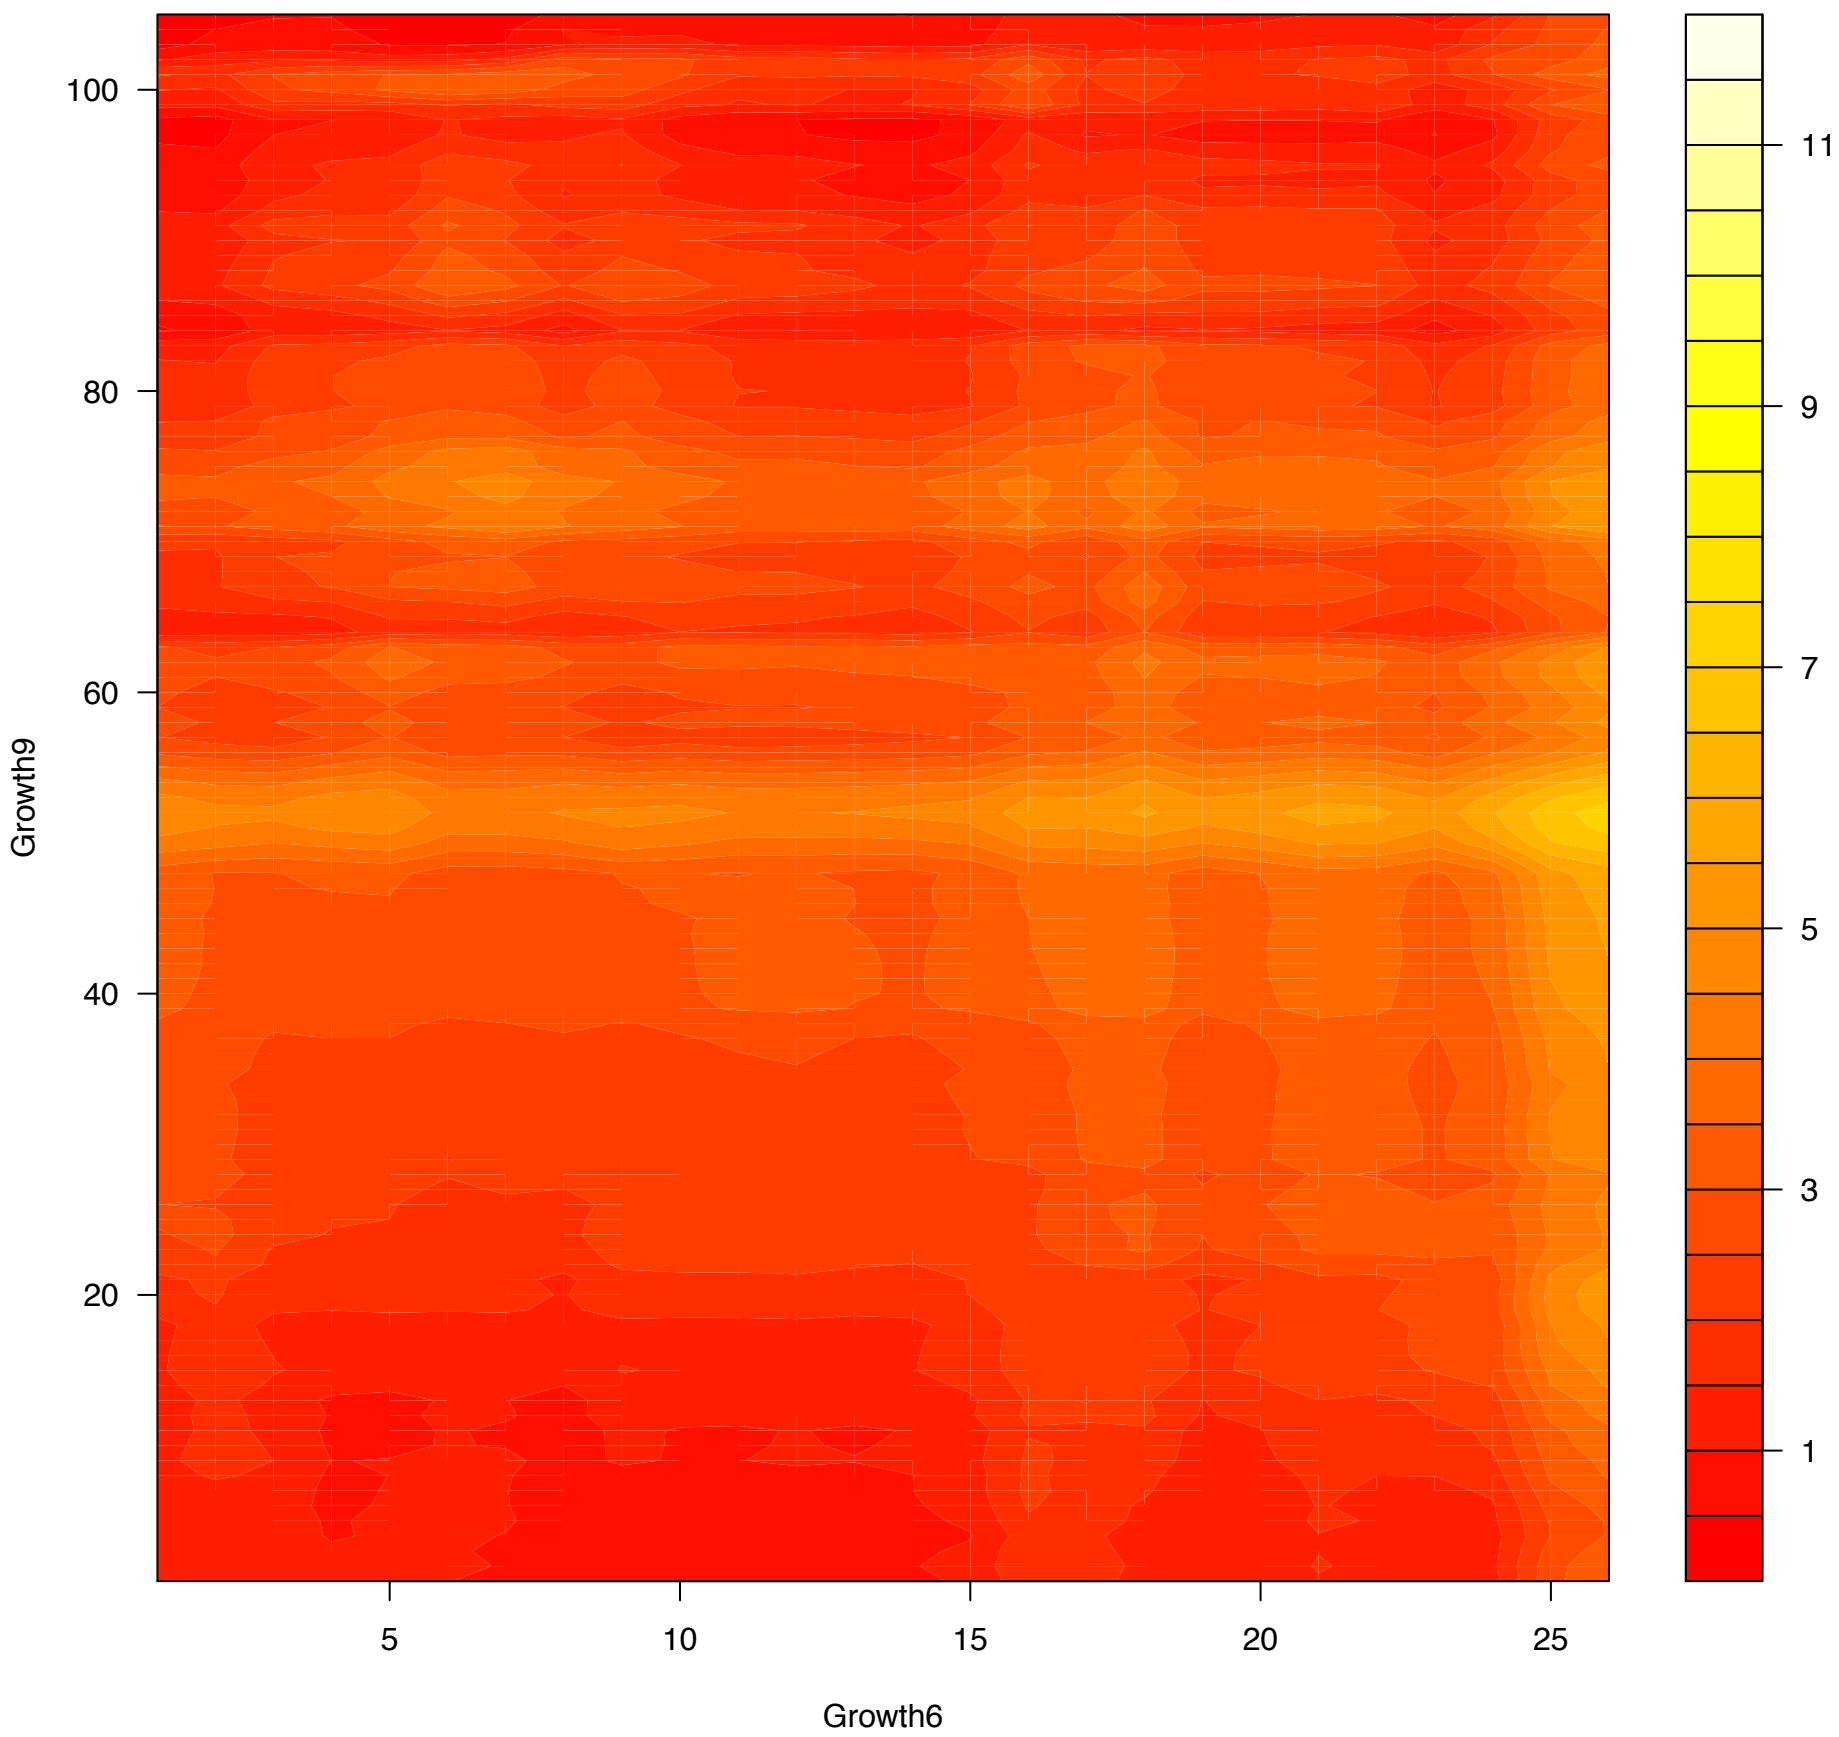

**F values**

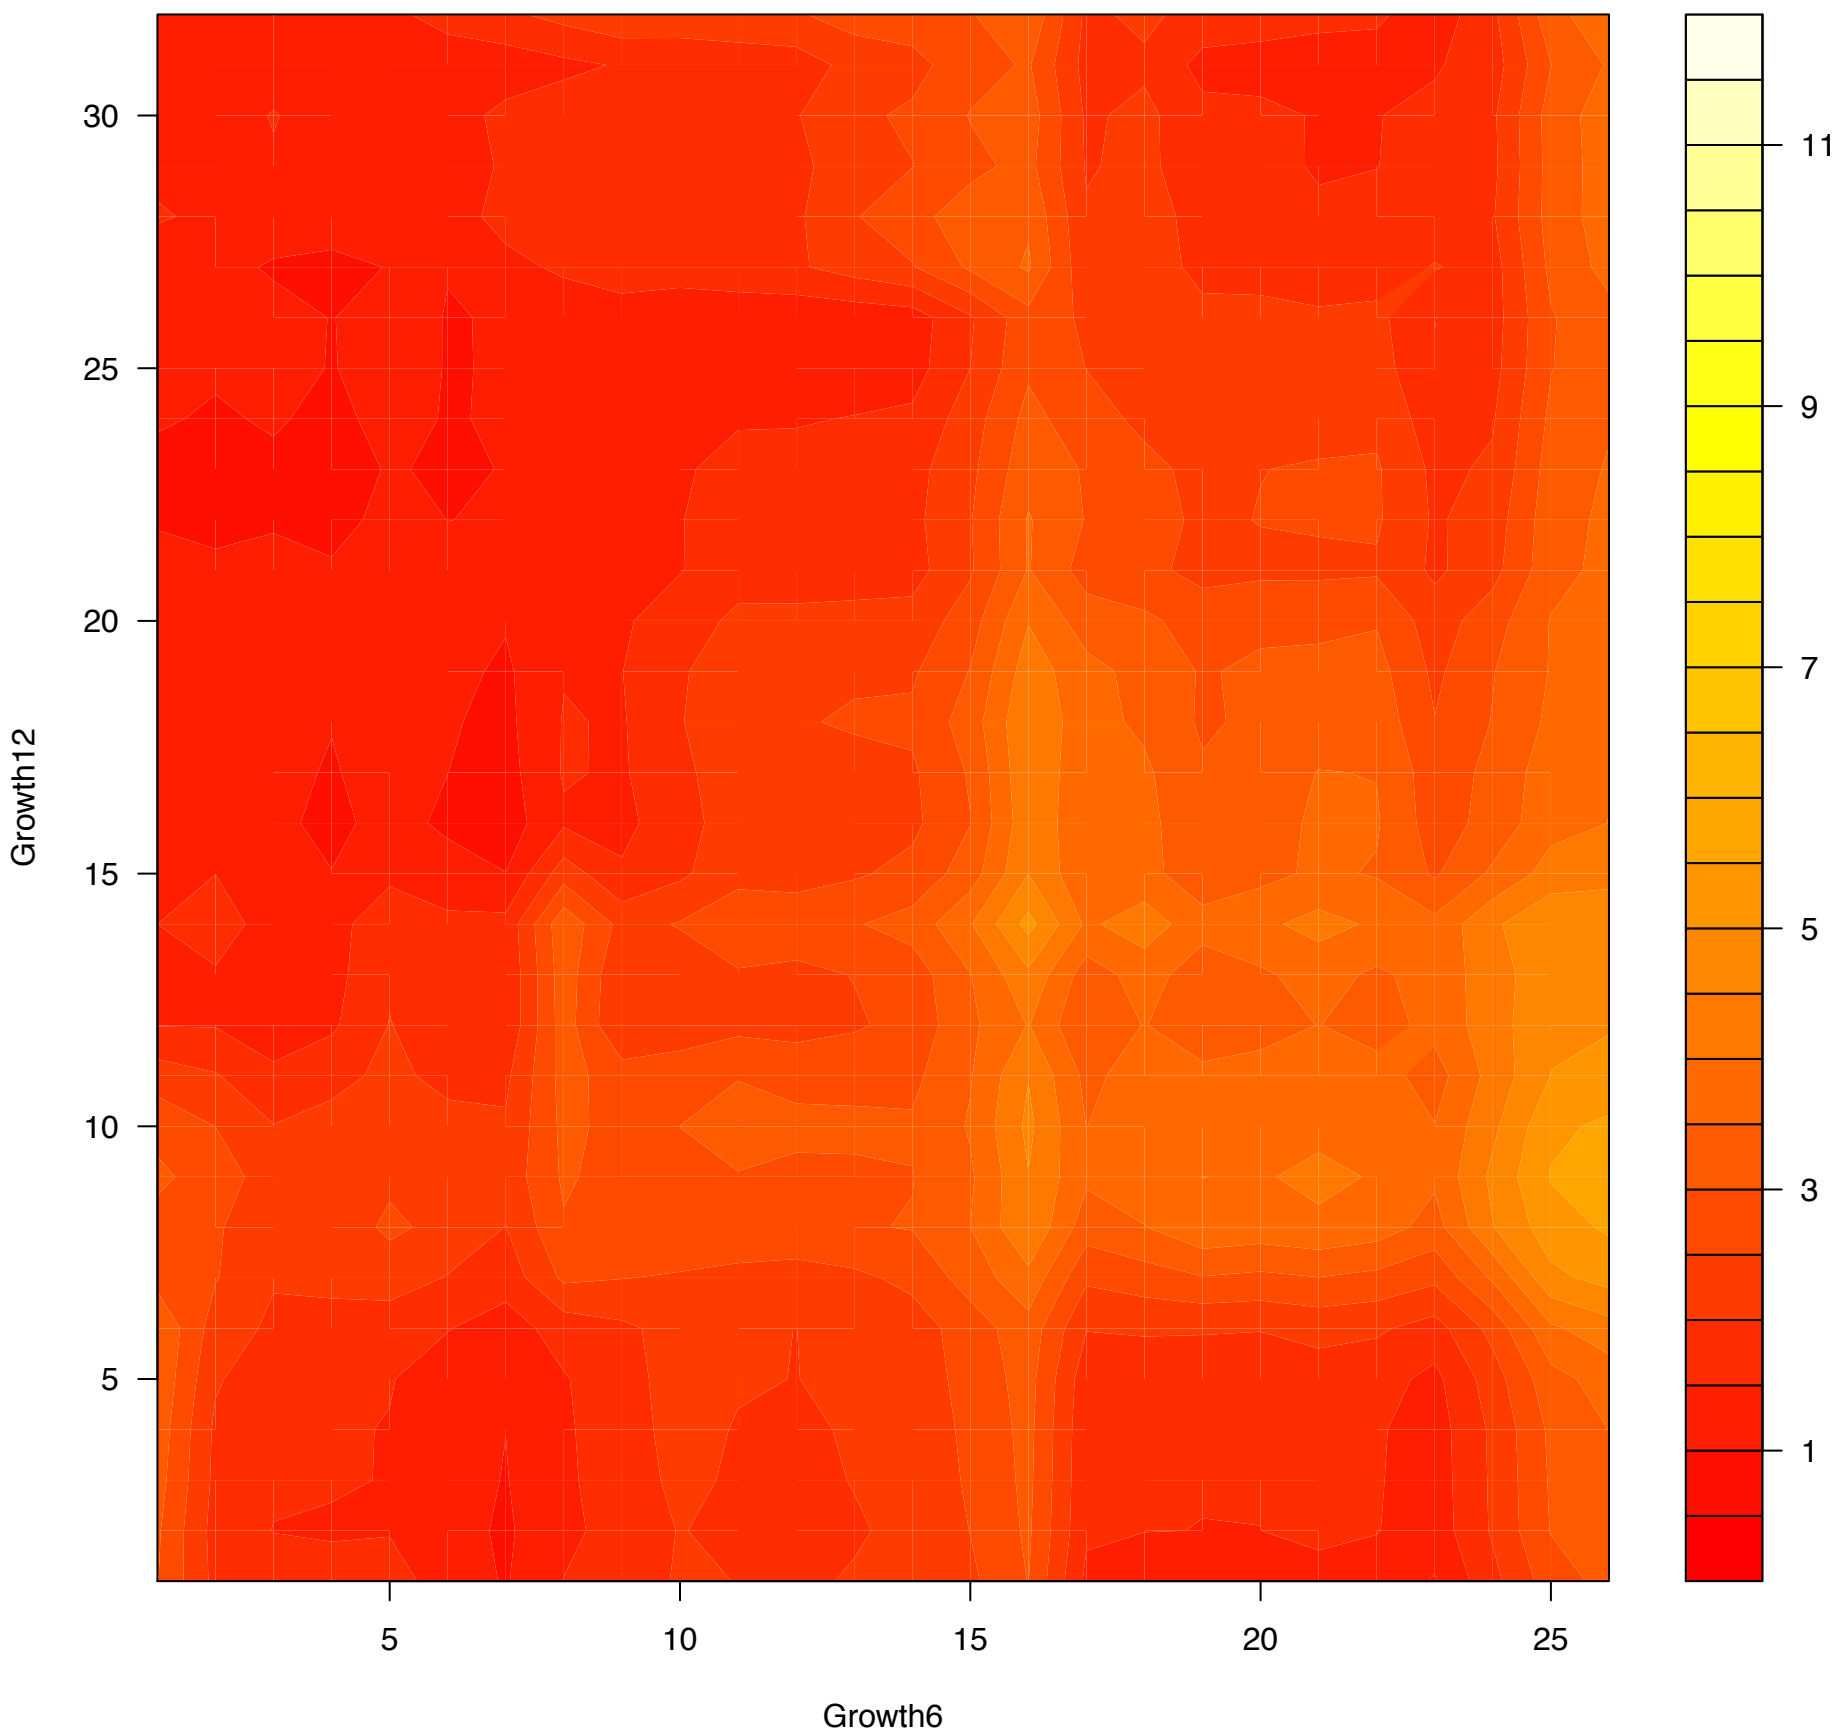

F values

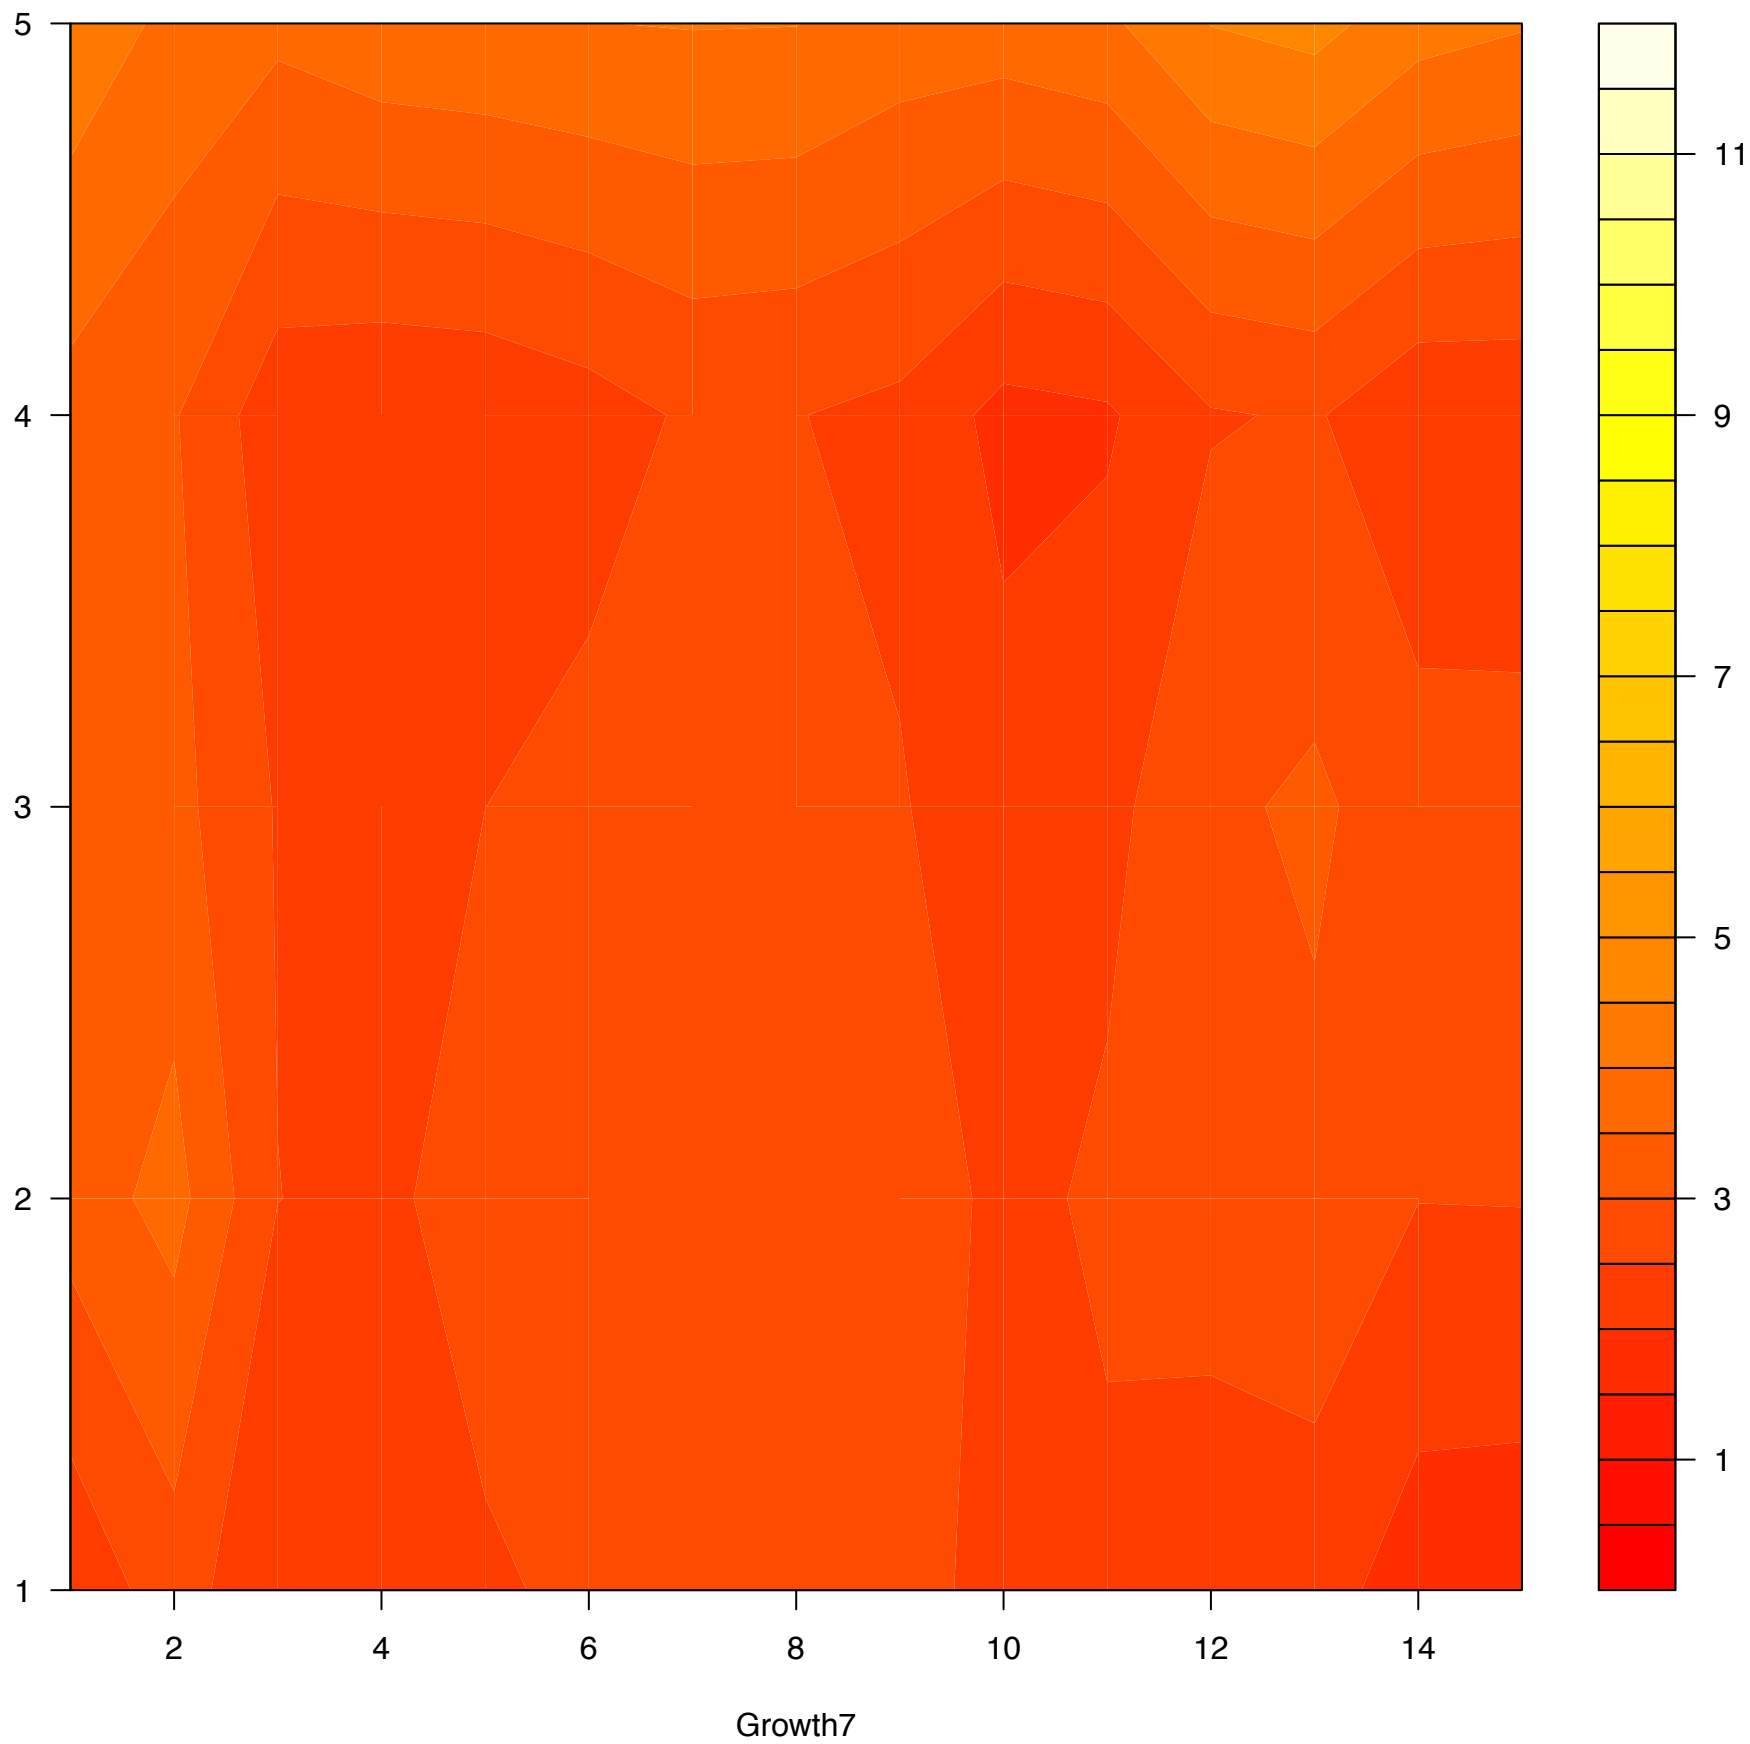

**F values**

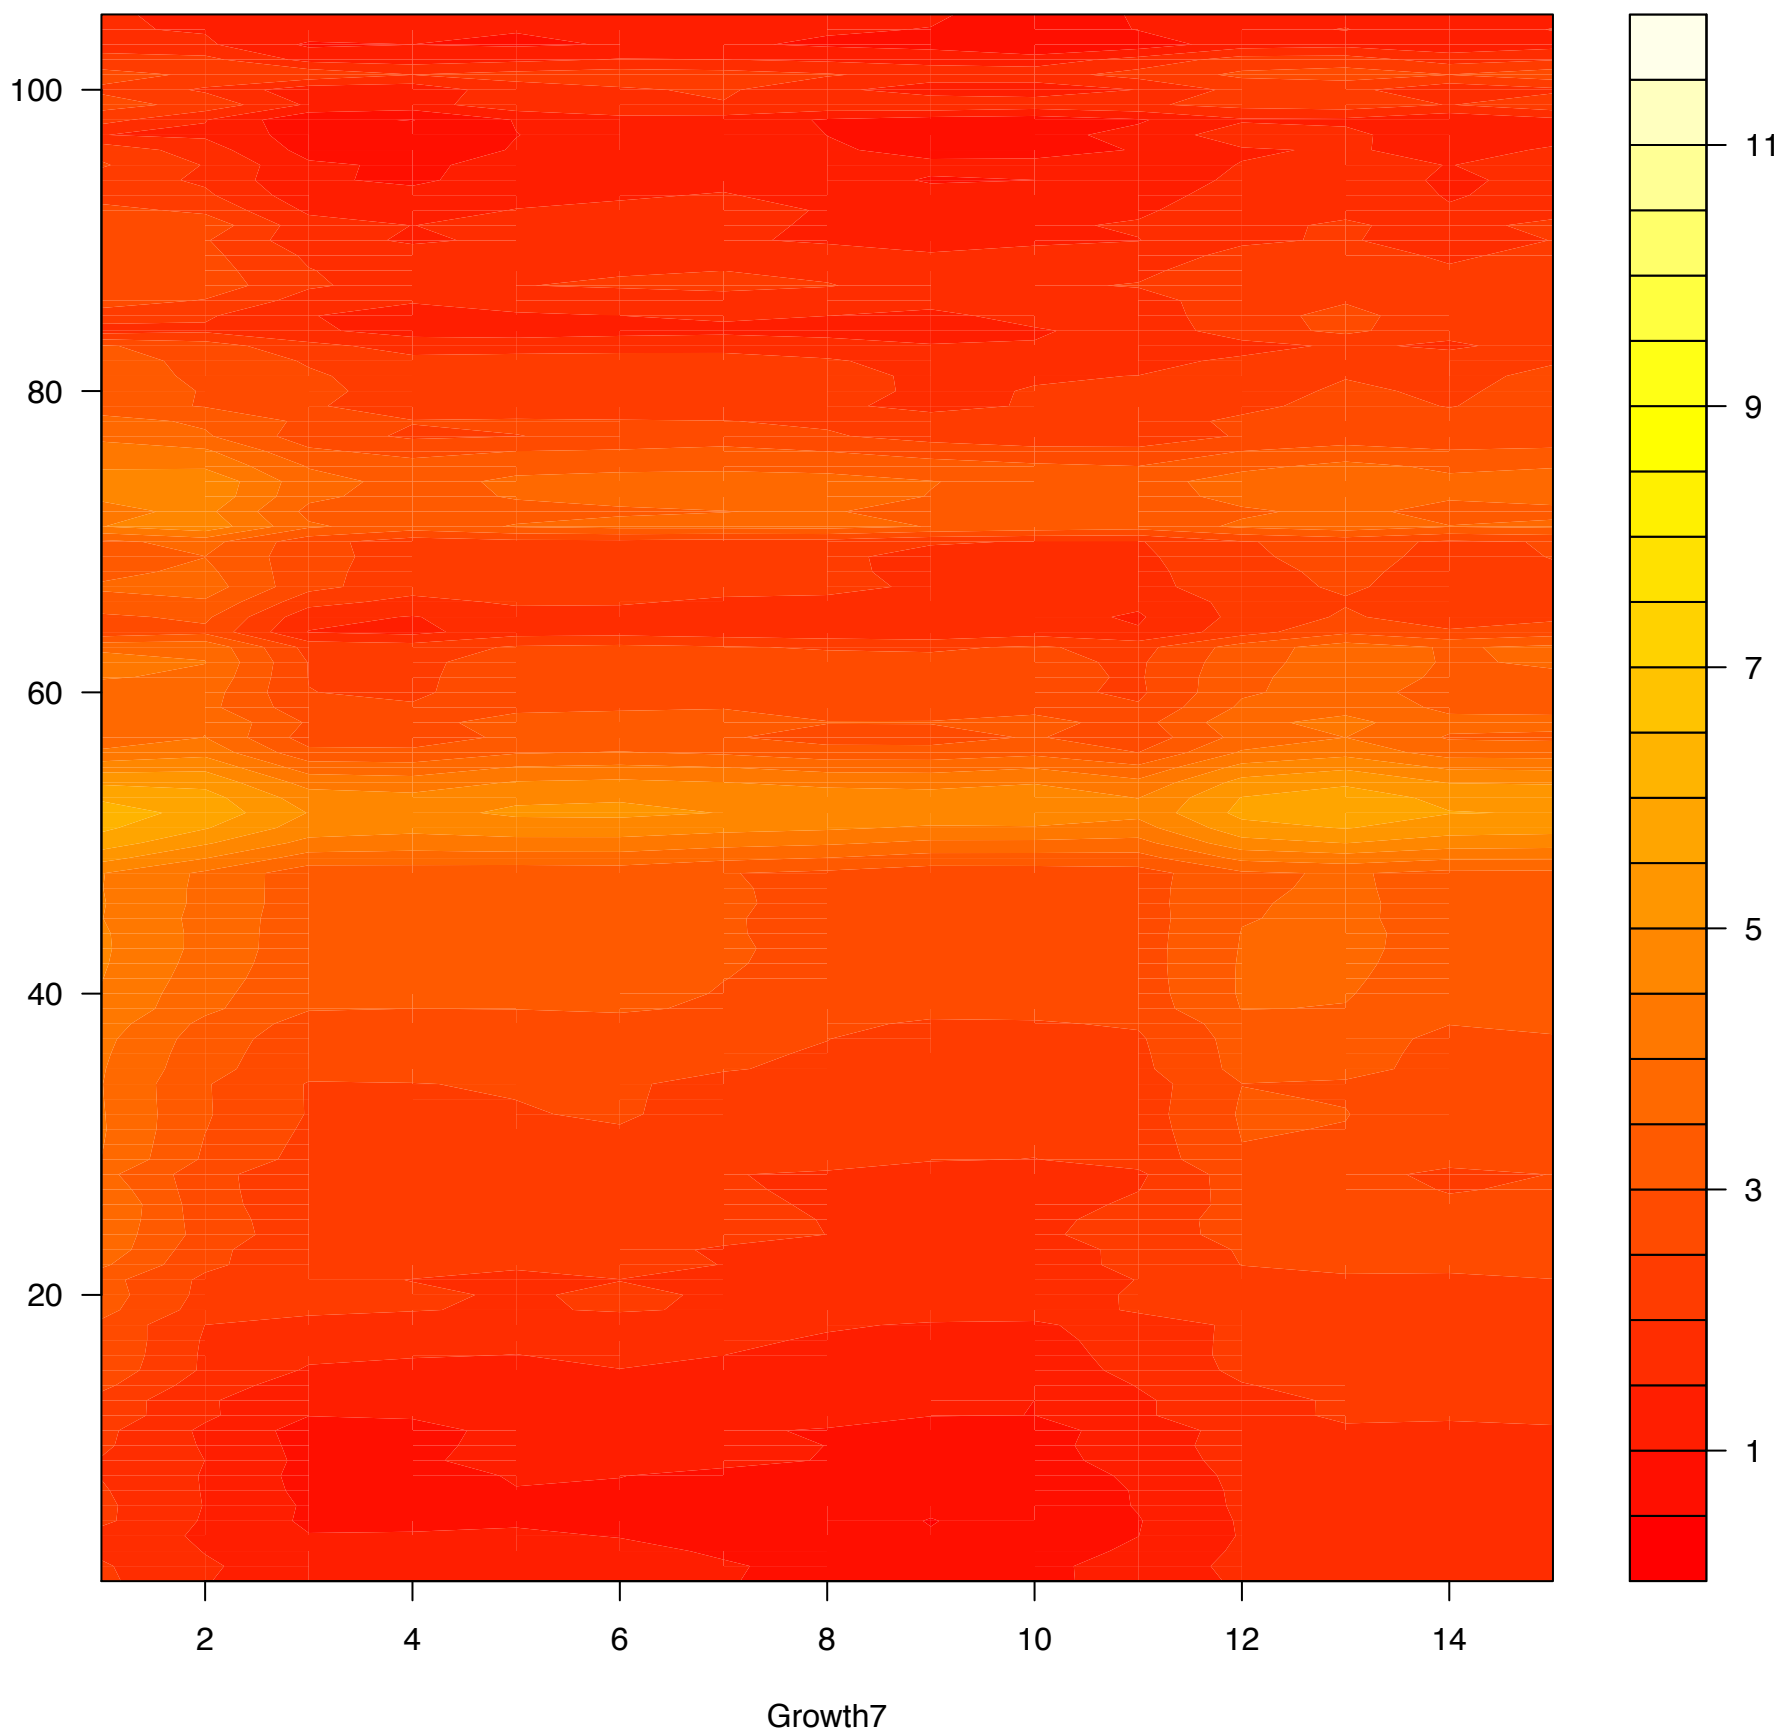



**F values**

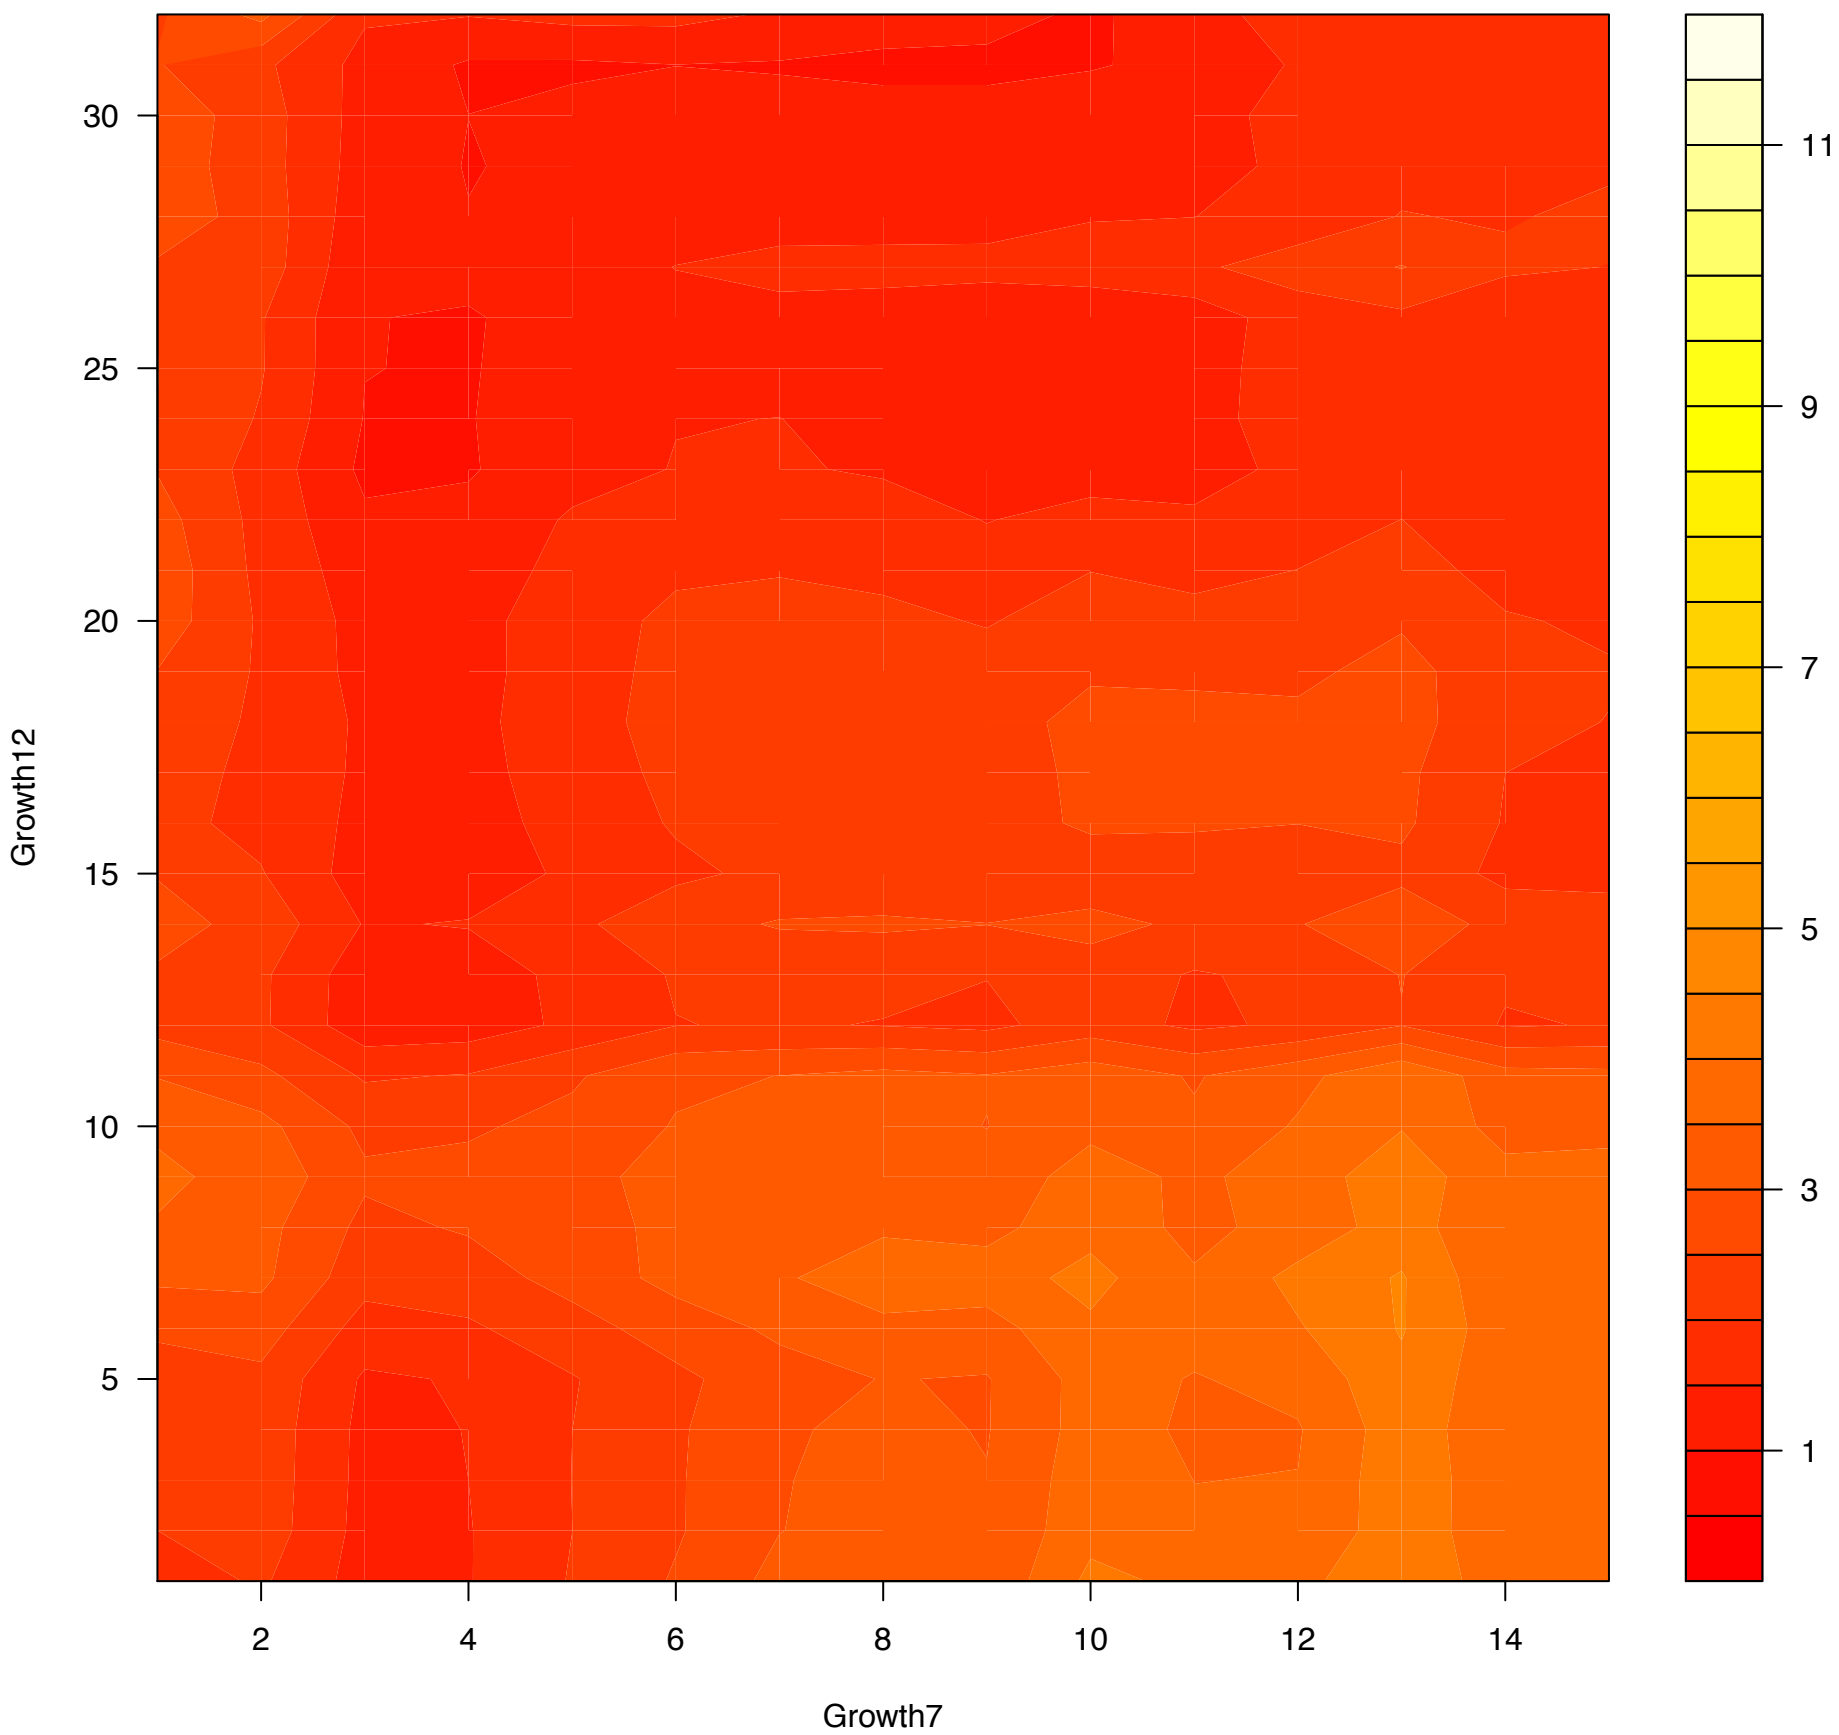

**F values**

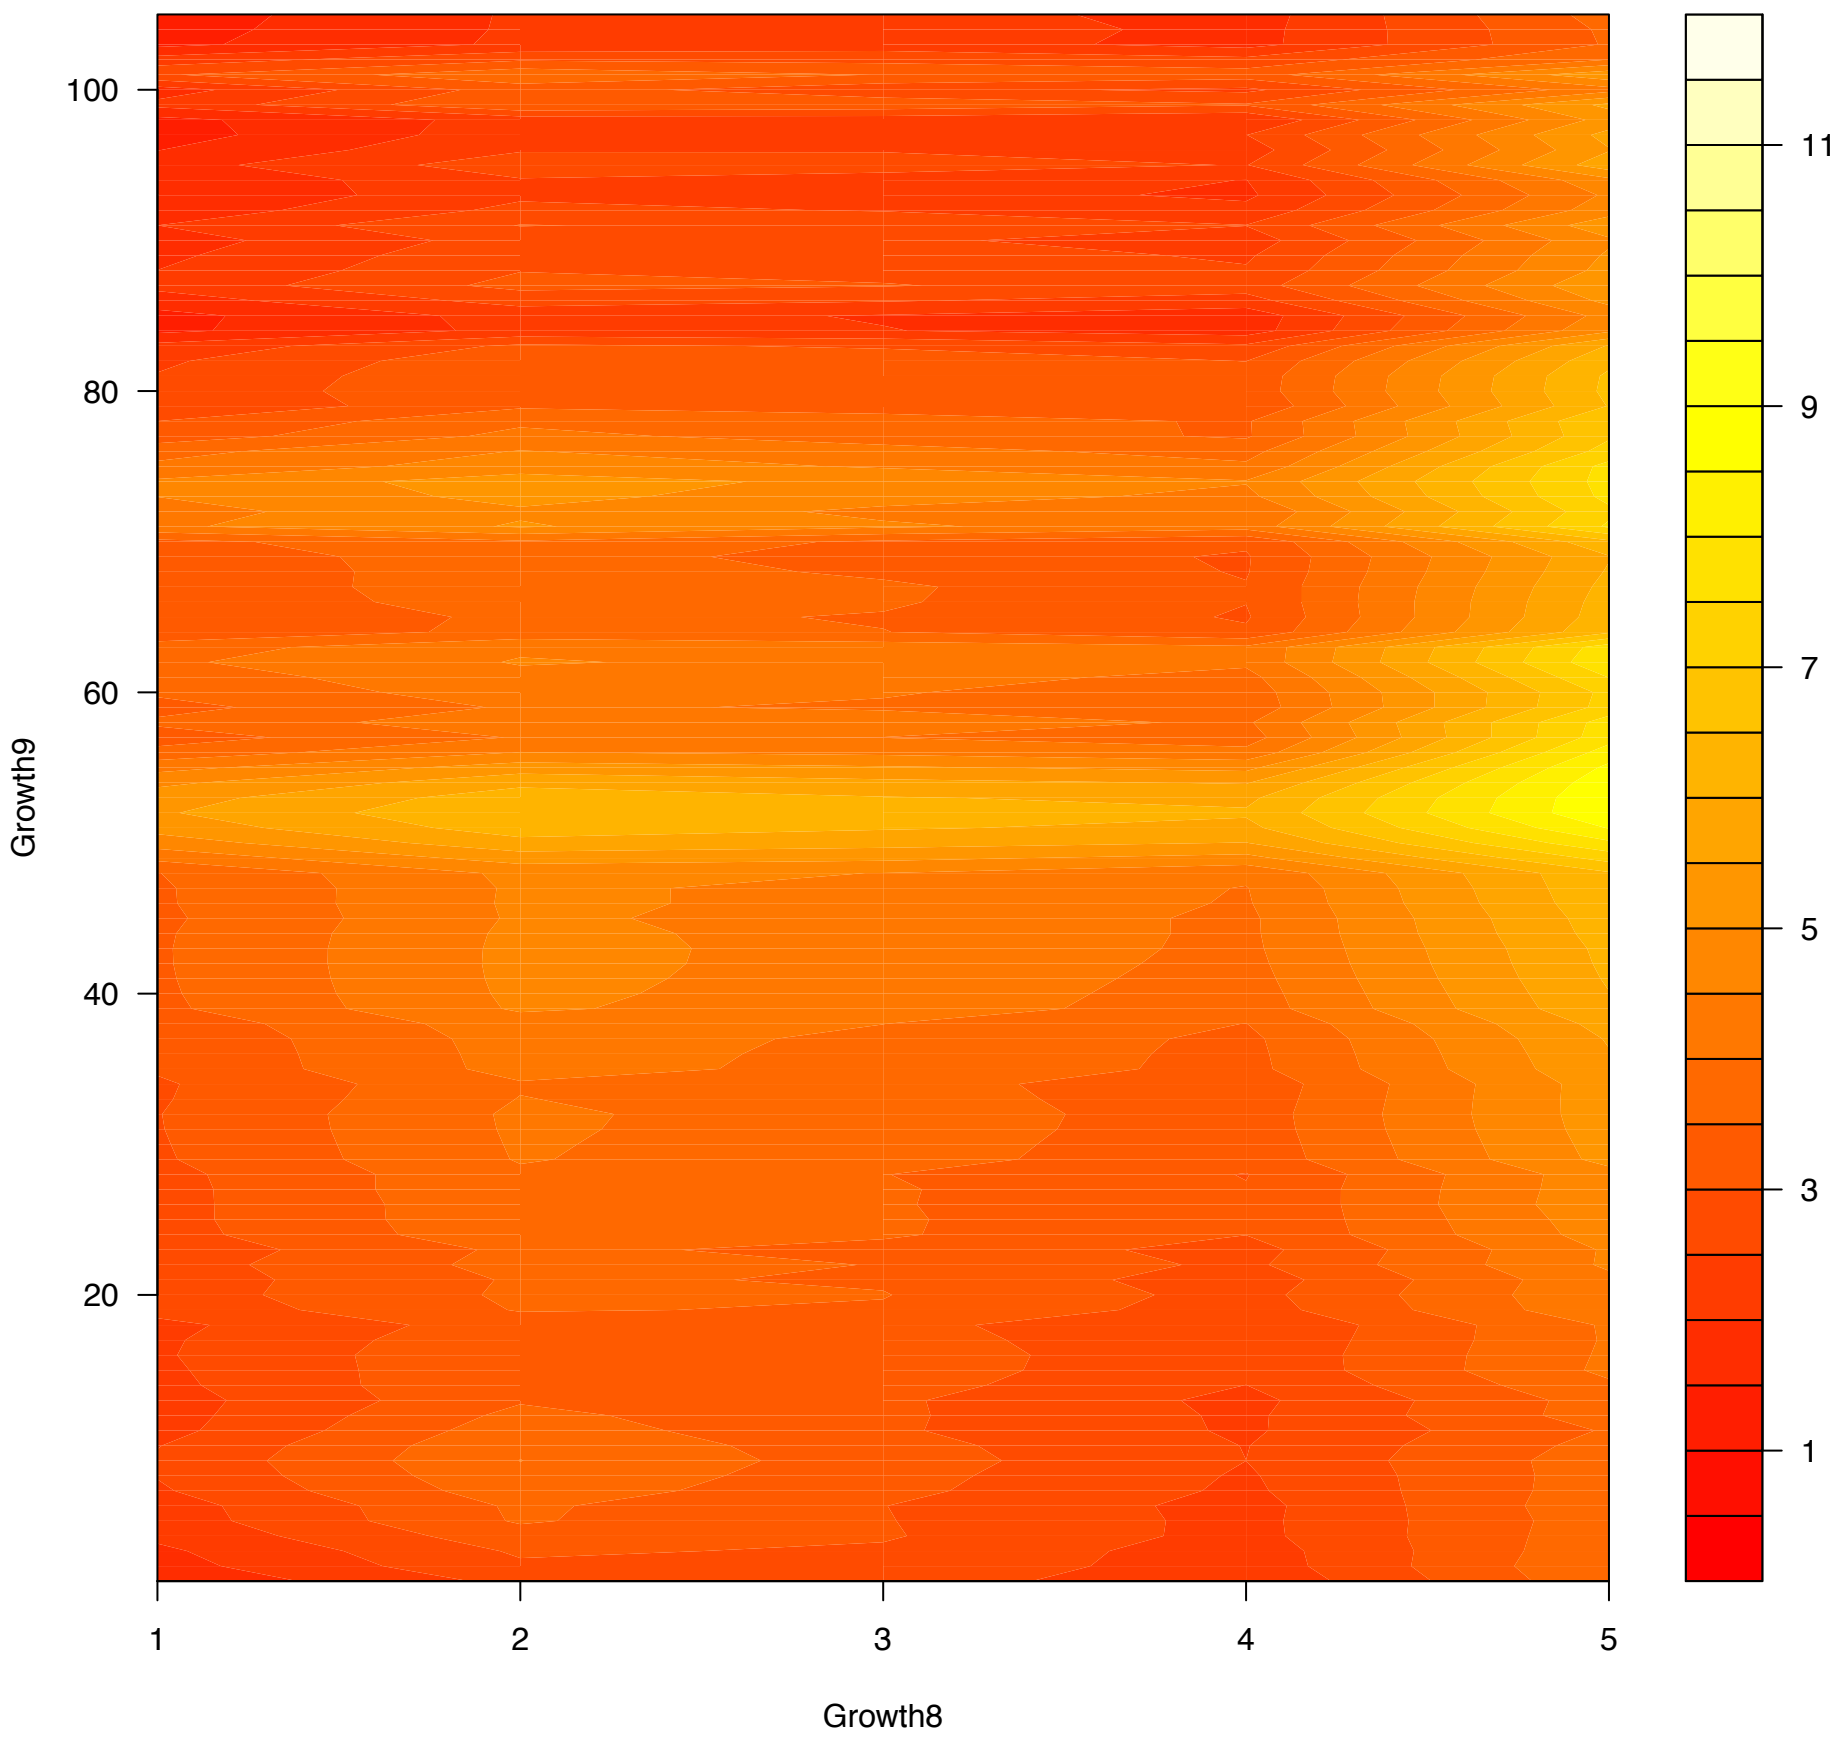

F values

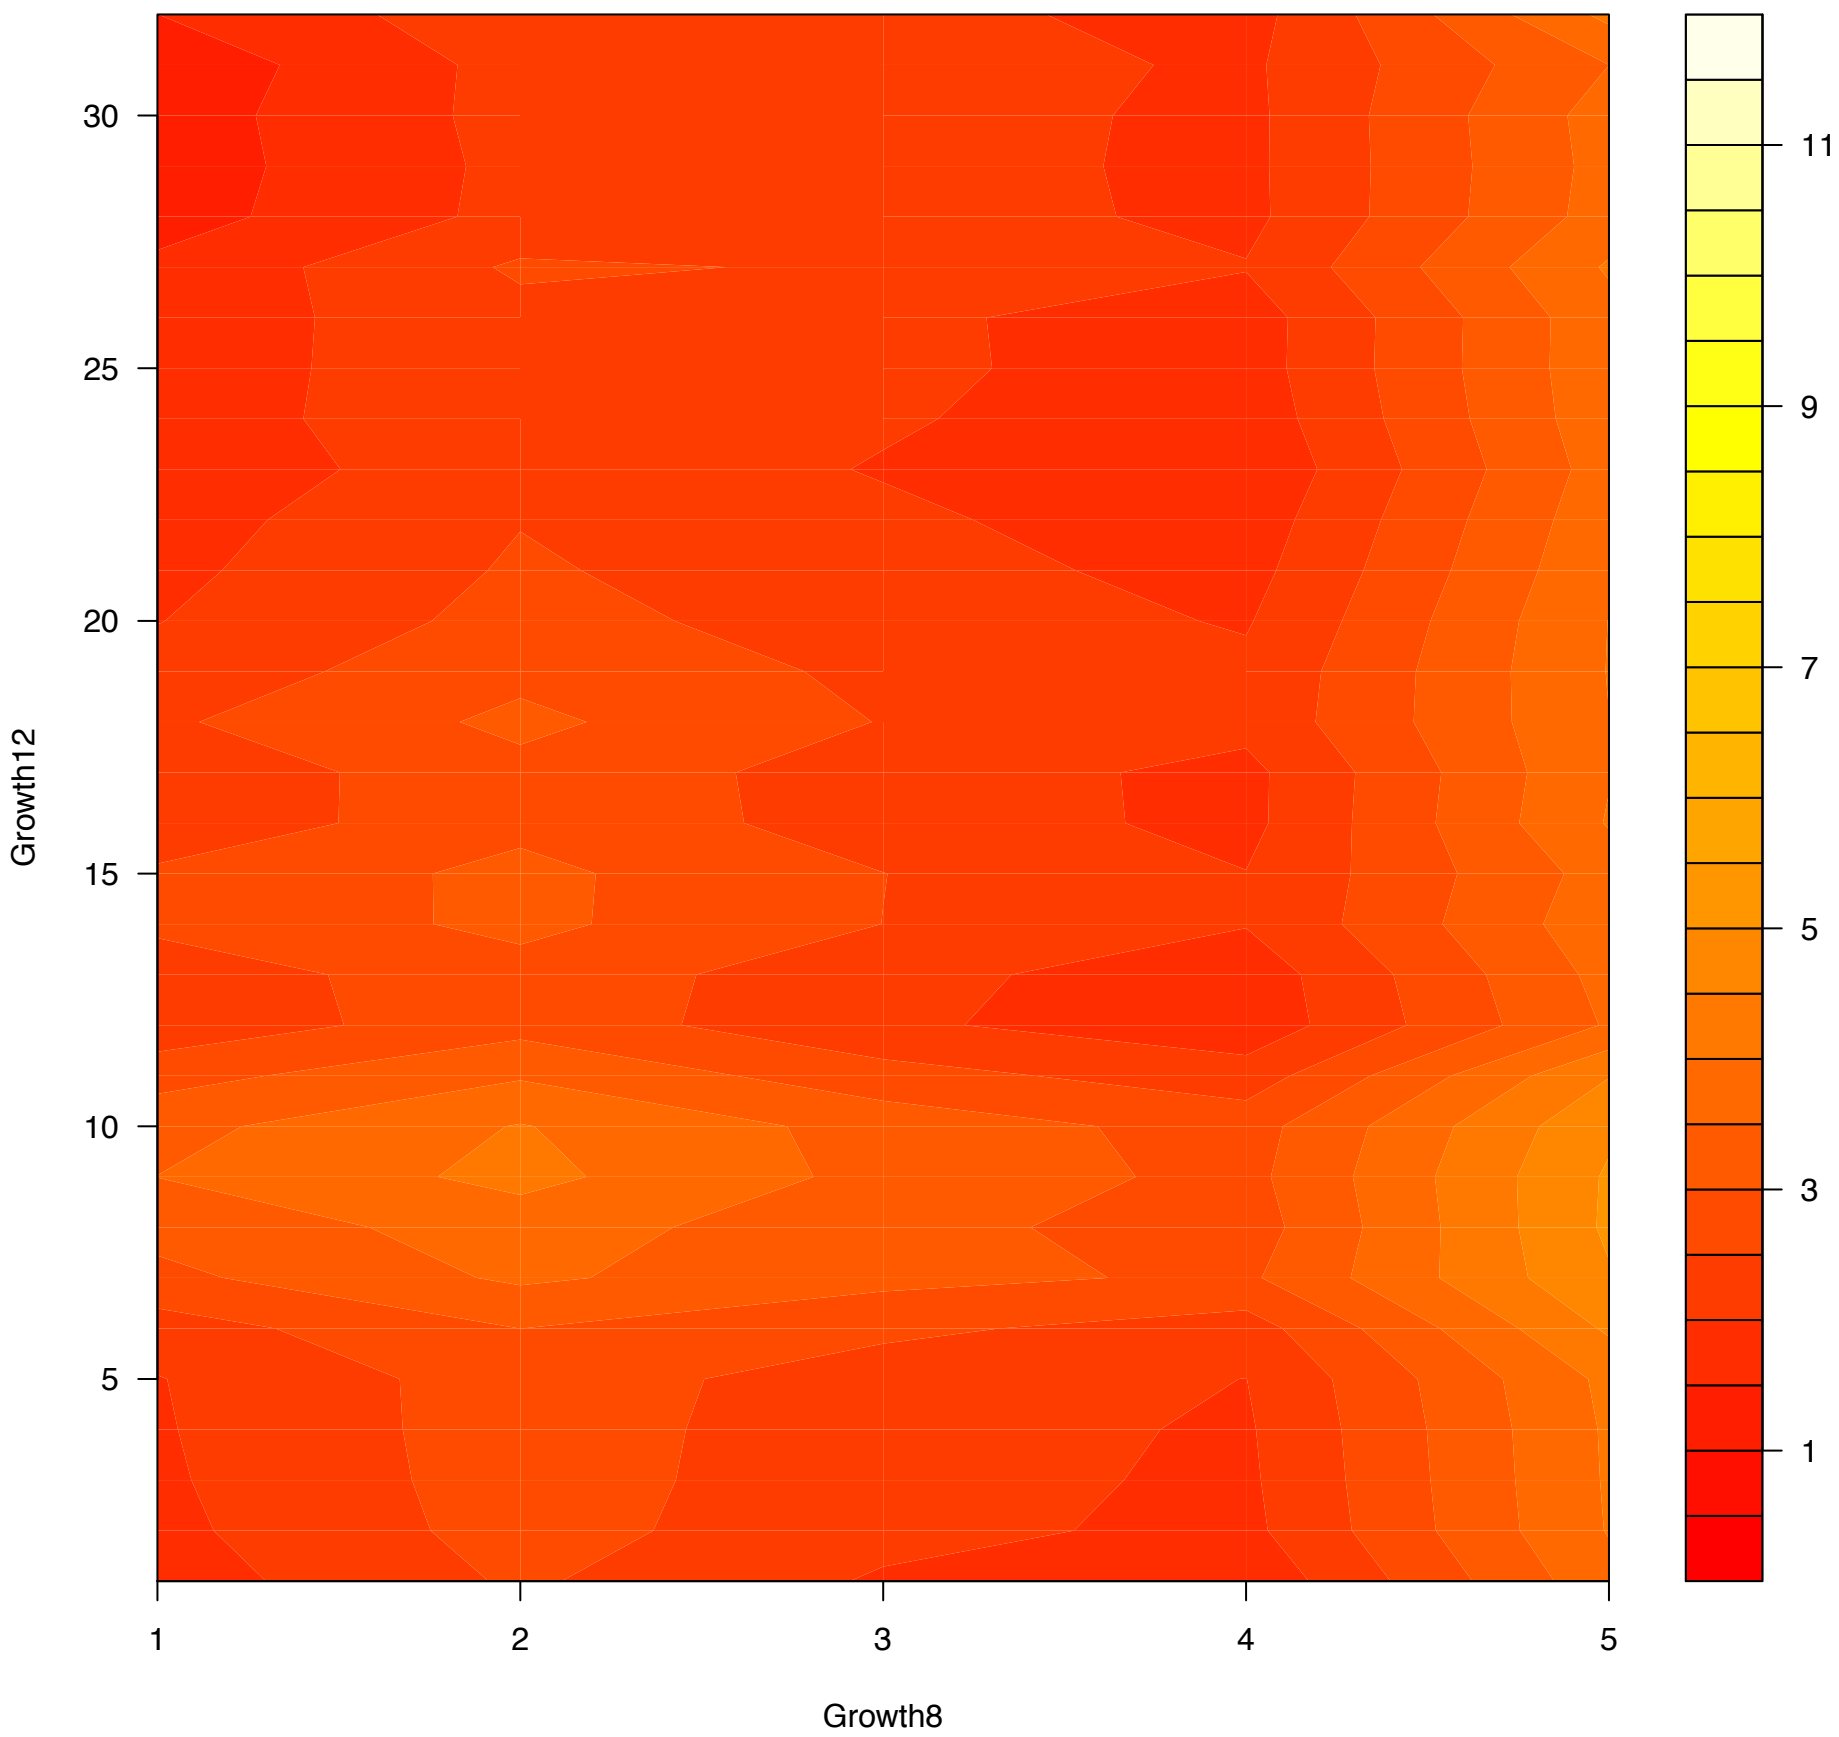

**F values**

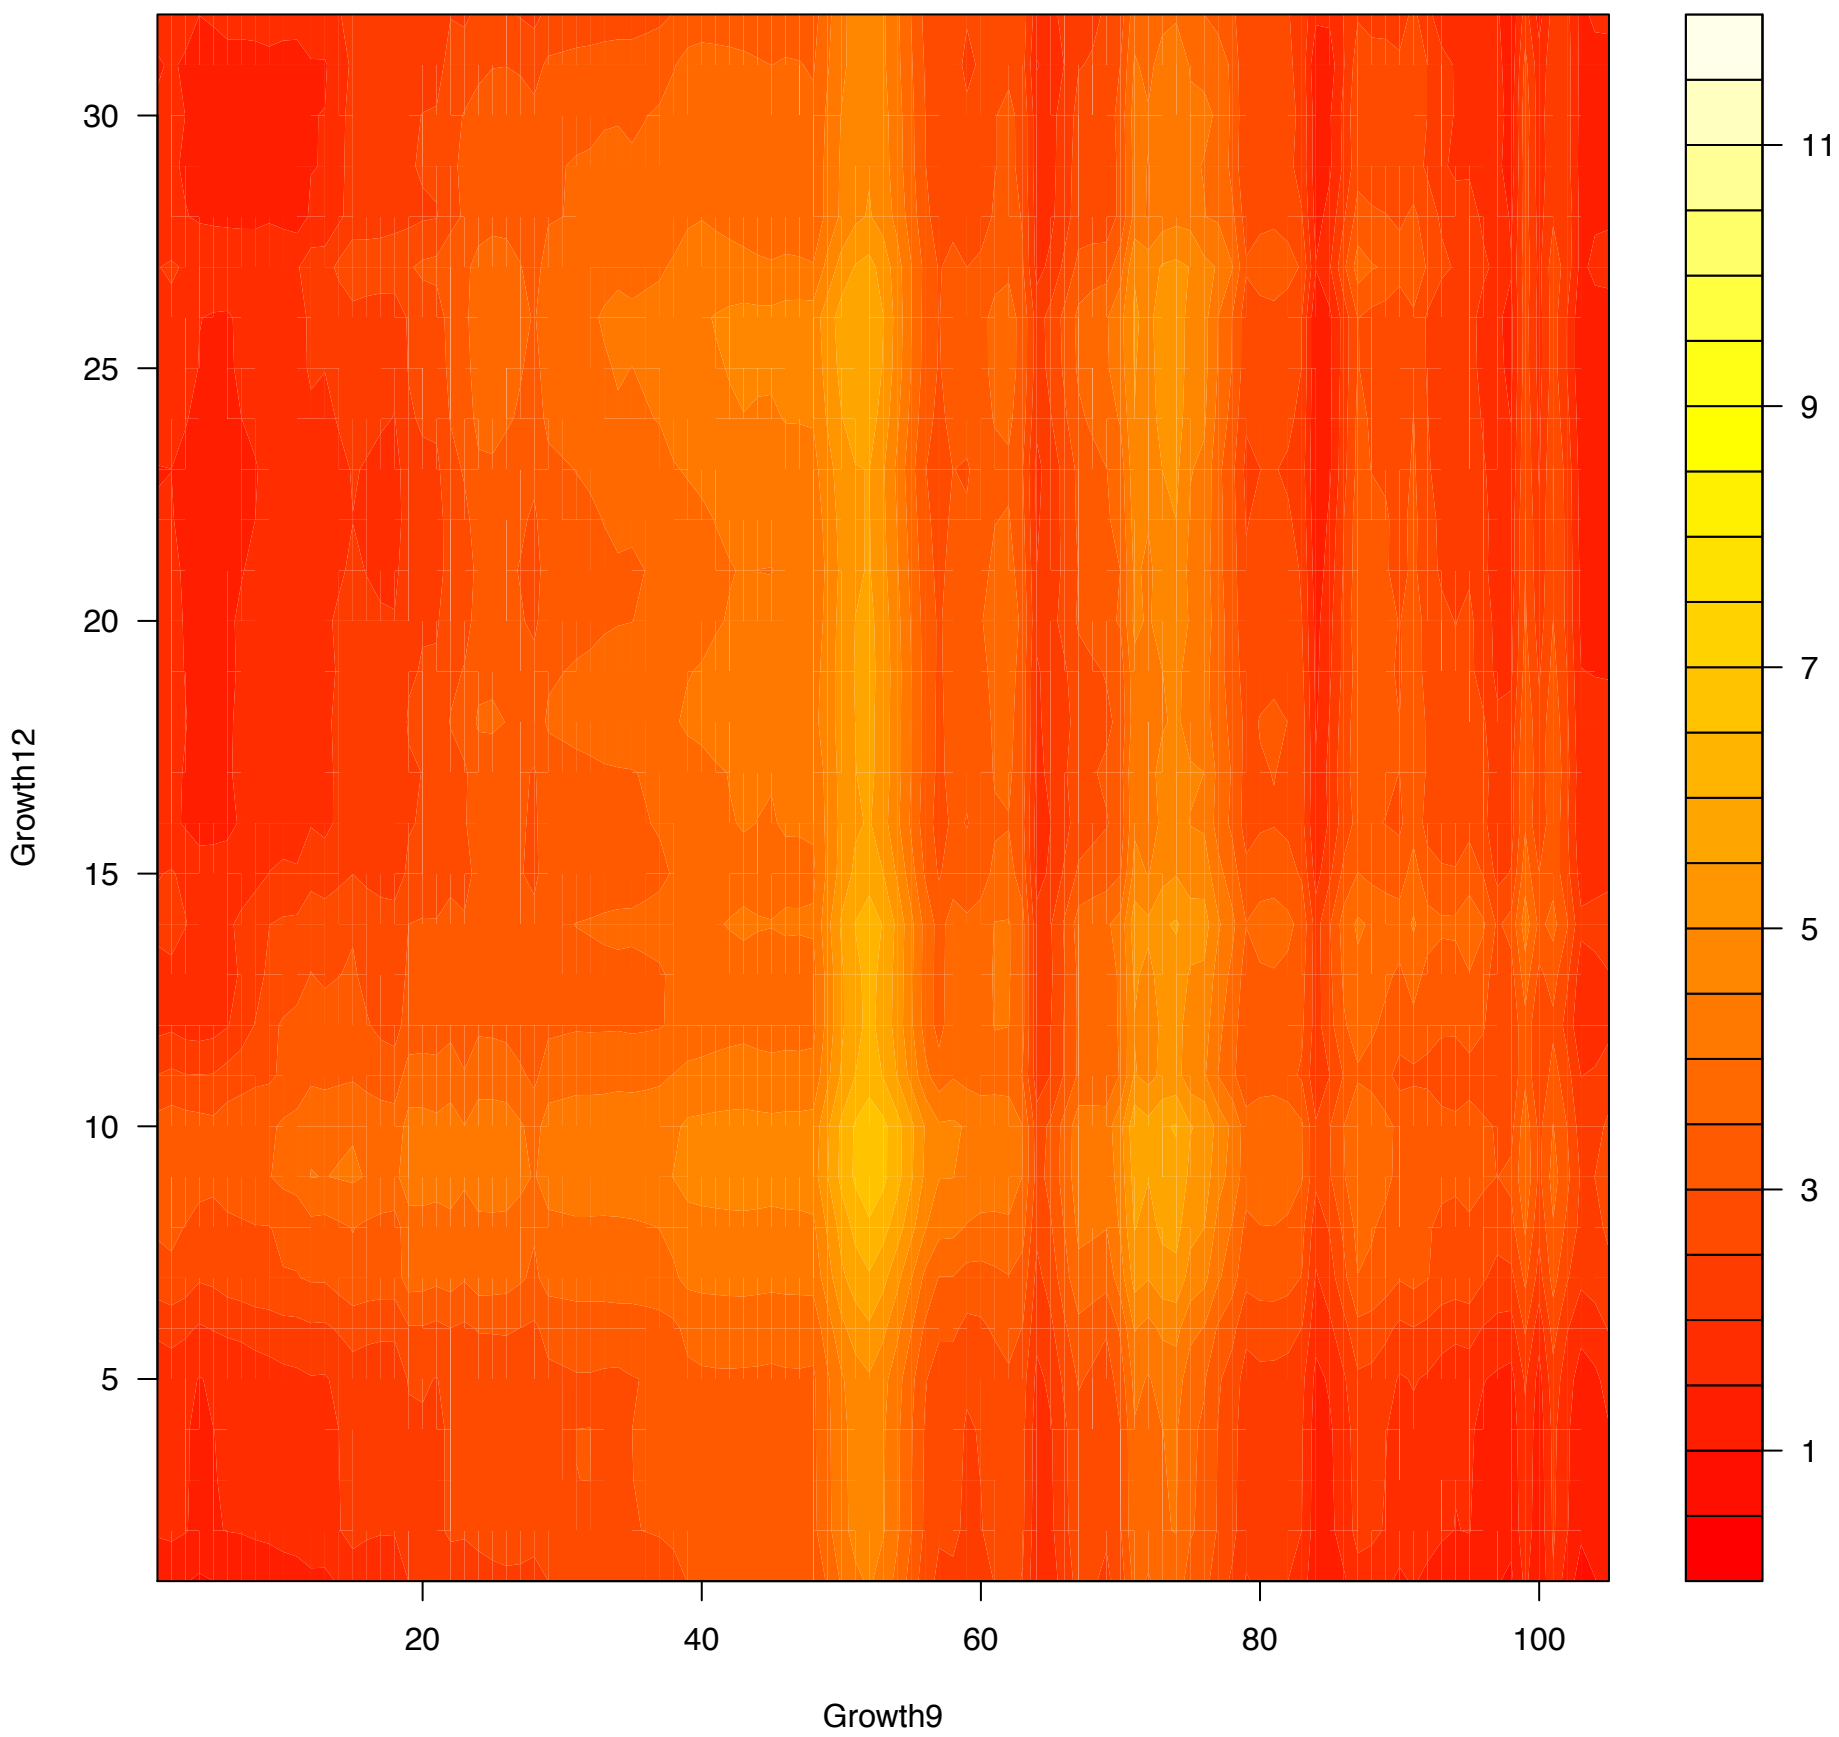

Supplement: pgen.1002180.s001.pdf [file pgen.1002180.s001.pdf]
